# Supplementary material
Source: PubMed Central journal article supplement (PMC5435457)

# Supporting Information

## 1,3-Oxazin-6-one Derivatives and Bohemamine-Type Pyrrolizidine

### Alkaloids from a Marine-Derived *Streptomyces spinoverrucosus*

Peng Fu, Scott La, and John B. MacMillan\*

Department of Biochemistry, University of Texas Southwestern Medical Center at Dallas, Dallas, Texas 75390, United States

#### List of Supporting Information

---

|                                                                                                                                    |     |
|------------------------------------------------------------------------------------------------------------------------------------|-----|
| <b>Bioassay Protocols</b> .....                                                                                                    | S3  |
| <b>Theory and Calculation Details</b> .....                                                                                        | S3  |
| <b>Figure S1.</b> DFT optimized geometries of the four lowest-energy conformers of (4 <i>S</i> , 5 <i>S</i> )- <b>1</b> .....      | S4  |
| <b>Table S1.</b> The calculated <sup>13</sup> C NMR Data for <b>1</b> and <b>1a</b> .....                                          | S5  |
| <b>Figure S2.</b> <sup>13</sup> C and 2D NMR of <b>3a</b> (These data were from HMBC and HSQC spectra).....                        | S5  |
| <b>Figure S3.</b> HRESIMS spectrum of spinoxazine A ( <b>1</b> ).....                                                              | S6  |
| <b>Figure S4.</b> <sup>1</sup> H-NMR spectrum of spinoxazine A ( <b>1</b> ) in DMSO- <i>d</i> <sub>6</sub> .....                   | S7  |
| <b>Figure S5.</b> <sup>13</sup> C-NMR spectrum of spinoxazine A ( <b>1</b> ) in DMSO- <i>d</i> <sub>6</sub> .....                  | S8  |
| <b>Figure S6.</b> HSQC spectrum of spinoxazine A ( <b>1</b> ) in DMSO- <i>d</i> <sub>6</sub> .....                                 | S9  |
| <b>Figure S7.</b> <sup>1</sup> H- <sup>1</sup> H COSY spectrum of spinoxazine A ( <b>1</b> ) in DMSO- <i>d</i> <sub>6</sub> .....  | S10 |
| <b>Figure S8.</b> HMBC spectrum of spinoxazine A ( <b>1</b> ) in DMSO- <i>d</i> <sub>6</sub> .....                                 | S11 |
| <b>Figure S9.</b> NOESY spectrum of spinoxazine A ( <b>1</b> ) in DMSO- <i>d</i> <sub>6</sub> .....                                | S12 |
| <b>Figure S10.</b> HRESIMS spectrum of spinoxazine B ( <b>2</b> ).....                                                             | S13 |
| <b>Figure S11.</b> <sup>1</sup> H-NMR spectrum of spinoxazine B ( <b>2</b> ) in DMSO- <i>d</i> <sub>6</sub> .....                  | S14 |
| <b>Figure S12.</b> <sup>13</sup> C-NMR spectrum of spinoxazine B ( <b>2</b> ) in DMSO- <i>d</i> <sub>6</sub> .....                 | S15 |
| <b>Figure S13.</b> HSQC spectrum of spinoxazine B ( <b>2</b> ) in DMSO- <i>d</i> <sub>6</sub> .....                                | S16 |
| <b>Figure S14.</b> <sup>1</sup> H- <sup>1</sup> H COSY spectrum of spinoxazine B ( <b>2</b> ) in DMSO- <i>d</i> <sub>6</sub> ..... | S17 |
| <b>Figure S15.</b> HMBC spectrum of spinoxazine B ( <b>2</b> ) in DMSO- <i>d</i> <sub>6</sub> .....                                | S18 |
| <b>Figure S16.</b> HRESIMS spectrum of bohemamine D ( <b>3</b> ).....                                                              | S19 |
| <b>Figure S17.</b> <sup>1</sup> H-NMR spectrum of bohemamine D ( <b>3</b> ) in DMSO- <i>d</i> <sub>6</sub> .....                   | S20 |
| <b>Figure S18.</b> <sup>13</sup> C-NMR spectrum of bohemamine D ( <b>3</b> ) in DMSO- <i>d</i> <sub>6</sub> .....                  | S21 |

|                                                                                                                                   |     |
|-----------------------------------------------------------------------------------------------------------------------------------|-----|
| <b>Figure S19.</b> HSQC spectrum of bohemamine D ( <b>3</b> ) in DMSO- <i>d</i> <sub>6</sub> .....                                | S22 |
| <b>Figure S20.</b> <sup>1</sup> H- <sup>1</sup> H COSY spectrum of bohemamine D ( <b>3</b> ) in DMSO- <i>d</i> <sub>6</sub> ..... | S23 |
| <b>Figure S21.</b> HMBC spectrum of bohemamine D ( <b>3</b> ) in DMSO- <i>d</i> <sub>6</sub> .....                                | S24 |
| <b>Figure S22.</b> HRESIMS spectrum of compound <b>3a</b> .....                                                                   | S25 |
| <b>Figure S23.</b> <sup>1</sup> H-NMR spectrum of compound <b>3a</b> in CDCl <sub>3</sub> .....                                   | S26 |
| <b>Figure S24.</b> HSQC spectrum of compound <b>3a</b> in CDCl <sub>3</sub> .....                                                 | S27 |
| <b>Figure S25.</b> HMBC spectrum of compound <b>3a</b> in CDCl <sub>3</sub> .....                                                 | S28 |
| <b>Figure S26.</b> NOESY spectrum of compound <b>3a</b> in CDCl <sub>3</sub> .....                                                | S29 |
| <b>Figure S27.</b> HRESIMS spectrum of bohemamine E ( <b>4</b> ) .....                                                            | S30 |
| <b>Figure S28.</b> <sup>1</sup> H-NMR spectrum of bohemamine E ( <b>4</b> ) in DMSO- <i>d</i> <sub>6</sub> .....                  | S31 |
| <b>Figure S29.</b> <sup>13</sup> C-NMR spectrum of bohemamine E ( <b>4</b> ) in DMSO- <i>d</i> <sub>6</sub> .....                 | S32 |
| <b>Figure S30.</b> <sup>1</sup> H- <sup>1</sup> H COSY spectrum of bohemamine E ( <b>4</b> ) in DMSO- <i>d</i> <sub>6</sub> ..... | S33 |
| <b>Figure S31.</b> HSQC spectrum of bohemamine E ( <b>4</b> ) in DMSO- <i>d</i> <sub>6</sub> .....                                | S34 |
| <b>Figure S32.</b> HMBC spectrum of bohemamine E ( <b>4</b> ) in DMSO- <i>d</i> <sub>6</sub> .....                                | S35 |
| <b>Figure S33.</b> NOESY spectrum of bohemamine E ( <b>4</b> ) in DMSO- <i>d</i> <sub>6</sub> .....                               | S36 |
| <b>Figure S34.</b> HRESIMS spectrum of bohemamine F ( <b>5</b> ) .....                                                            | S37 |
| <b>Figure S35.</b> <sup>1</sup> H-NMR spectrum of bohemamine F ( <b>5</b> ) in DMSO- <i>d</i> <sub>6</sub> .....                  | S38 |
| <b>Figure S36.</b> <sup>13</sup> C-NMR spectrum of bohemamine F ( <b>5</b> ) in DMSO- <i>d</i> <sub>6</sub> .....                 | S39 |
| <b>Figure S37.</b> <sup>1</sup> H- <sup>1</sup> H COSY spectrum of bohemamine F ( <b>5</b> ) in DMSO- <i>d</i> <sub>6</sub> ..... | S40 |
| <b>Figure S38.</b> HSQC spectrum of bohemamine F ( <b>5</b> ) in DMSO- <i>d</i> <sub>6</sub> .....                                | S41 |
| <b>Figure S39.</b> HMBC spectrum of bohemamine F ( <b>5</b> ) in DMSO- <i>d</i> <sub>6</sub> .....                                | S42 |
| <b>Figure S40.</b> NOESY spectrum of bohemamine F ( <b>5</b> ) in DMSO- <i>d</i> <sub>6</sub> .....                               | S43 |
| <b>Figure S41.</b> HRESIMS spectrum of bohemamine G ( <b>6</b> ) .....                                                            | S44 |
| <b>Figure S42.</b> <sup>1</sup> H-NMR spectrum of bohemamine G ( <b>6</b> ) in DMSO- <i>d</i> <sub>6</sub> .....                  | S45 |
| <b>Figure S43.</b> <sup>13</sup> C-NMR spectrum of bohemamine G ( <b>6</b> ) in DMSO- <i>d</i> <sub>6</sub> .....                 | S46 |
| <b>Figure S44.</b> <sup>1</sup> H- <sup>1</sup> H COSY spectrum of bohemamine G ( <b>6</b> ) in DMSO- <i>d</i> <sub>6</sub> ..... | S47 |
| <b>Figure S45.</b> HSQC spectrum of bohemamine G ( <b>6</b> ) in DMSO- <i>d</i> <sub>6</sub> .....                                | S48 |
| <b>Figure S46.</b> HMBC spectrum of bohemamine G ( <b>6</b> ) in DMSO- <i>d</i> <sub>6</sub> .....                                | S49 |
| <b>Figure S47.</b> NOESY spectrum of bohemamine G ( <b>6</b> ) in DMSO- <i>d</i> <sub>6</sub> .....                               | S50 |
| <b>Figure S48.</b> HRESIMS spectrum of bohemamine H ( <b>7</b> ) .....                                                            | S51 |
| <b>Figure S49.</b> <sup>1</sup> H-NMR spectrum of bohemamine H ( <b>7</b> ) in DMSO- <i>d</i> <sub>6</sub> .....                  | S52 |
| <b>Figure S50.</b> <sup>13</sup> C-NMR spectrum of bohemamine H ( <b>7</b> ) in DMSO- <i>d</i> <sub>6</sub> .....                 | S53 |
| <b>Figure S51.</b> <sup>1</sup> H- <sup>1</sup> H COSY spectrum of bohemamine H ( <b>7</b> ) in DMSO- <i>d</i> <sub>6</sub> ..... | S54 |
| <b>Figure S52.</b> HSQC spectrum of bohemamine H ( <b>7</b> ) in DMSO- <i>d</i> <sub>6</sub> .....                                | S55 |
| <b>Figure S53.</b> HMBC spectrum of bohemamine H ( <b>7</b> ) in DMSO- <i>d</i> <sub>6</sub> .....                                | S56 |
| <b>Figure S54.</b> NOESY spectrum of bohemamine H ( <b>7</b> ) in DMSO- <i>d</i> <sub>6</sub> .....                               | S57 |

|                                                                                                                                   |     |
|-----------------------------------------------------------------------------------------------------------------------------------|-----|
| <b>Figure S55.</b> HRESIMS spectrum of bohemamine I ( <b>8</b> ) .....                                                            | S58 |
| <b>Figure S56.</b> <sup>1</sup> H-NMR spectrum of bohemamine I ( <b>8</b> ) in DMSO- <i>d</i> <sub>6</sub> .....                  | S59 |
| <b>Figure S57.</b> <sup>13</sup> C-NMR spectrum of bohemamine I ( <b>8</b> ) in DMSO- <i>d</i> <sub>6</sub> .....                 | S60 |
| <b>Figure S58.</b> <sup>1</sup> H- <sup>1</sup> H COSY spectrum of bohemamine I ( <b>8</b> ) in DMSO- <i>d</i> <sub>6</sub> ..... | S61 |
| <b>Figure S59.</b> HSQC spectrum of bohemamine I ( <b>8</b> ) in DMSO- <i>d</i> <sub>6</sub> .....                                | S62 |
| <b>Figure S60.</b> HMBC spectrum of bohemamine I ( <b>8</b> ) in DMSO- <i>d</i> <sub>6</sub> .....                                | S63 |
| <b>Figure S61.</b> NOESY spectrum of bohemamine I ( <b>8</b> ) in DMSO- <i>d</i> <sub>6</sub> .....                               | S64 |

---

## Bioassay Protocols

**Antibiotic assays.** The antibiotic activities against *Pseudomonas aeruginosa* and *Bacillus subtilis* were evaluated by an agar dilution method. The tested strains were cultivated in LB agar plates at 37 °C. Compounds **1–9**, and positive control (erythromycin) were dissolved in MeOH at different concentrations from 100 to 0.1 μg/mL by the continuous 10-fold dilution methods. A 10 μL quantity of test solution was absorbed by a paper disk (5 mm diameter) and placed on the assay plates. After 24 h incubation, zones of inhibition (mm in diameter) were recorded.

**Cytotoxicity assays.** Cell lines were cultivated in 10 cm dishes (Corning, Inc.) in NSCLC cell-culture medium: RPMI/L-glutamine medium (Invitrogen, Inc.), 1000 U/mL penicillin (Invitrogen, Inc.), 1 mg/mL streptomycin (Invitrogen, Inc.), and 5% fetal bovine serum (Atlanta Biologicals, Inc.). Cell lines were grown in a humidified environment in the presence of 5% CO<sub>2</sub> at 37 °C. For cell viability assays, HCC366, A549, HCC44 and HCC1171 cells (60 μL) were plated individually at a density of 1200, 750 and 500 cells/well, respectively, in 384-well microtiter assay plates (Bio-one; Greiner, Inc.). After incubating the assay plates overnight under the growth conditions described above, purified compounds were dissolved and diluted in DMSO and subsequently added to each plate with final compound concentrations ranging from 50 μM to 1 nM and a final DMSO concentration of 0.5%. After an incubation of 96 h under growth conditions, Cell Titer Glo reagent (Promega, Inc.) was added to each well (10 mL of a 1:2 dilution in NSCLC culture medium) and mixed. Plates were incubated for 10 min at room temperature, and luminescence was determined for each well using an Envision multimodal plate reader (Perkin-Elmer, Inc.). Relative luminescence units were normalized to the untreated control wells (cells plus DMSO only). Data were analyzed using the Assay Analyzer and Condoseo modules of the Screener Software Suite (GeneData, Inc.) as described previously.<sup>S1</sup>

**Theory and Calculation Details.** The calculations were performed by using the density functional theory (DFT) as carried out in the Gaussian 03.<sup>S2</sup> The preliminary conformational distributions search was performed by HyperChem 7.5 software. All ground-state geometries were optimized at the B3LYP/6-31G(d) level. Solvent effects of methanol solution were evaluated at the same DFT level by using the SCRF/PCM method.<sup>S3</sup> TDDFT<sup>S4</sup> at B3LYP/6-31G(d) was employed to calculate the electronic excitation energies and rotational strengths in methanol. The stable conformations obtained at the B3LYP/6-31G(d) level were further used in magnetic shielding constants at the B3LYP/6-311++G(2d,p) level.

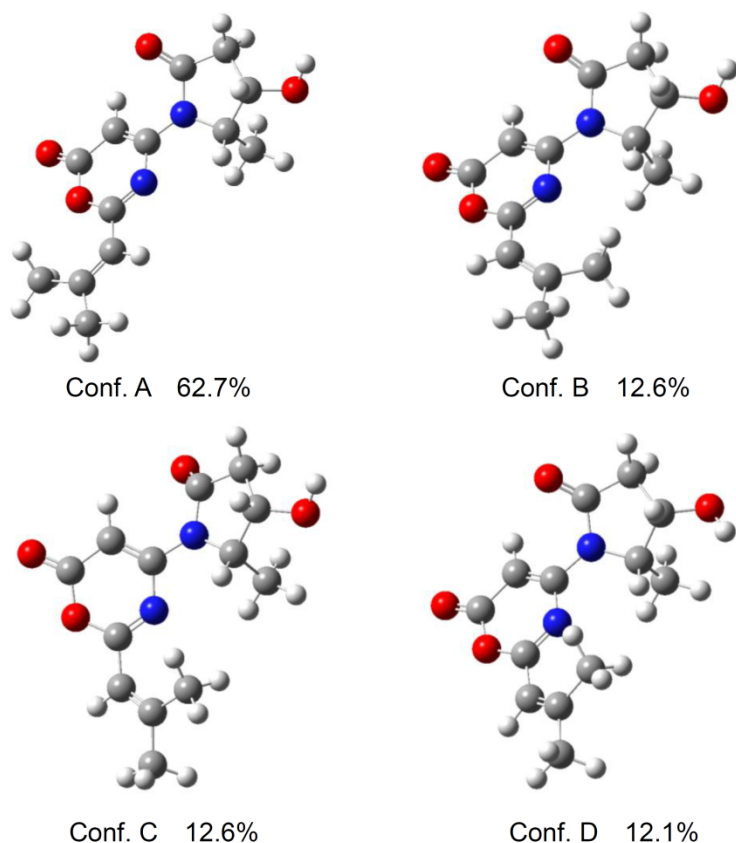

**Figure S1.** DFT optimized geometries of the four lowest-energy conformers of (4*S*, 5*S*)-1

(S1) Kim, H. S.; Mendiratta, S.; Kim, J.; Pecot, C. V.; Larsen, J. E.; Zubovych, I.; Seo, B. Y.; Kim, J.; Eskiocak, B.; Chung, H.; McMillan, E.; Wu, S.; De Brabander J.; Komurov, K.; Toombs, J. E.; Wei, S.; Peyton, M.; Williams, N.; Gazdar, A. F.; Posner, B. A.; Brekken, R. A.; Sood, A. K.; Deberardinis, R. J.; Roth, M. G.; Minna, J. D.; White, M. A. *Cell* **2013**, *155*, 552–566.

(S2) Gaussian 03, Revision E.01, M. J. Frisch, G. W. Trucks, H. B. Schlegel, G. E. Scuseria, M. A. Robb, J. R. Cheeseman, J. A. Montgomery, Jr., T. Vreven, K. N. Kudin, J. C. Burant, J. M. Millam, S. S. Iyengar, J. Tomasi, V. Barone, B. Mennucci, M. Cossi, G. Scalmani, N. Rega, G. A. Petersson, H. Nakatsuji, M. Hada, M. Ehara, K. Toyota, R. Fukuda, J. Hasegawa, M. Ishida, T. Nakajima, Y. Honda, O. Kitao, H. Nakai, M. Klene, X. Li, J. E. Knox, H. P. Hratchian, J. B. Cross, V. Bakken, C. Adamo, J. Jaramillo, R. Gomperts, R. E. Stratmann, O. Yazyev, A. J. Austin, R. Cammi, C. Pomelli, J. W. Ochterski, P. Y. Ayala, K. Morokuma, G. A. Voth, P. Salvador, J. J. Dannenberg, V. G. Zakrzewski, S. Dapprich, A. D. Daniels, M. C. Strain, O. Farkas, D. K. Malick, A. D. Rabuck, K. Raghavachari, J. B. Foresman, J. V. Ortiz, Q. Cui, A. G. Baboul, S. Clifford, J. Cioslowski, B. B. Stefanov, G. Liu, A. Liashenko, P. Piskorz, I. Komaromi, R. L. Martin, D. J. Fox, T. Keith, M. A. Al-Laham, C. Y. Peng, A. Nanayakkara, M. Challacombe, P. M. W. Gill, B. Johnson, W. Chen, M. W. Wong, C. Gonzalez, and J. A. Pople, Gaussian, Inc., Wallingford CT, 2004.

(S3) (a) Miertus, S.; Tomasi, J. *Chem. Phys.* **1982**, *65*, 239–245. (b) Tomasi, J.; Persico, M. *Chem. Rev.* **1994**, *94*, 2027–2094. (c) Cammi, R.; Tomasi, J. *J. Comp. Chem.* **1995**, *16*, 1449–1458.

(S4) (a) Casida, M. E. In *Recent Advances in Density Functional Methods*, part I; Chong, D. P., Eds.; World Scientific: Singapore, 1995; pp 155–192. (b) Gross, E. K. U.; Dobson, J. F.; Petersilka, M. *Top. Curr. Chem.* **1996**, *181*, 81–172. (c) Gross, E. K. U.; Kohn, W. *Adv. Quantum Chem.* **1990**, *21*, 255–291. (d) Runge, E.; Gross, E. K. U. *Phys. Rev. Lett.* **1984**, *52*, 997–1000.

**Table S1.** The calculated  $^{13}\text{C}$  NMR Data for **1** and **1a**

| position | measured <b>1</b> | Calcd. <b>1</b> | Corr. <b>1</b> | Error <b>1</b> | Calcd. <b>1a</b> | Corr. <b>1a</b> | Error <b>1a</b> |
|----------|-------------------|-----------------|----------------|----------------|------------------|-----------------|-----------------|
| 1        | 159.8             | 163.32          | 155.7235       | 4.076468       | 173.07           | 163.8759        | -4.07586        |
| 2        | 89                | 95.78           | 90.54068       | -1.54068       | 94.14            | 88.71082        | 0.289178        |
| 3        | 155.3             | 162.2           | 154.6426       | 0.65738        | 174.23           | 164.9805        | -9.68053        |
| 4        | 57.7              | 62.76           | 58.67308       | -0.97308       | 66.85            | 62.72256        | -5.02256        |
| 5        | 64.1              | 72.98           | 68.5364        | -4.4364        | 73.08            | 68.65538        | -4.55538        |
| 6        | 39.3              | 45.32           | 41.84173       | -2.54173       | 40.57            | 37.69611        | 1.603889        |
| 7        | 173.4             | 177.12          | 169.0419       | 4.358088       | 178.47           | 169.0183        | 4.381719        |
| 8        | 13.3              | 11.91           | 9.597741       | 3.702259       | 14.81            | 13.16486        | 0.135137        |
| 1'       | 163.7             | 173.55          | 165.5965       | -1.89651       | 173.9            | 164.6663        | -0.96627        |
| 2'       | 116.2             | 124.56          | 118.3163       | -2.11626       | 122.83           | 116.0323        | 0.167691        |
| 3'       | 158.7             | 169             | 161.2053       | -2.5053        | 170.71           | 161.6284        | -2.92843        |
| 4'       | 28                | 30.57           | 27.60651       | 0.393493       | 30.02            | 27.64935        | 0.350654        |
| 5'       | 21                | 20.84           | 18.21608       | 2.783916       | 20.5             | 18.58345        | 2.41655         |

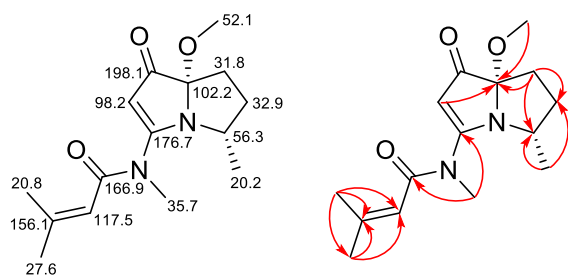**Figure S2.**  $^{13}\text{C}$  and 2D NMR of **3a** (These data were from HMBC and HSQC spectra).

**Figure S3.** HRESIMS spectrum of spinoxazine A (1)

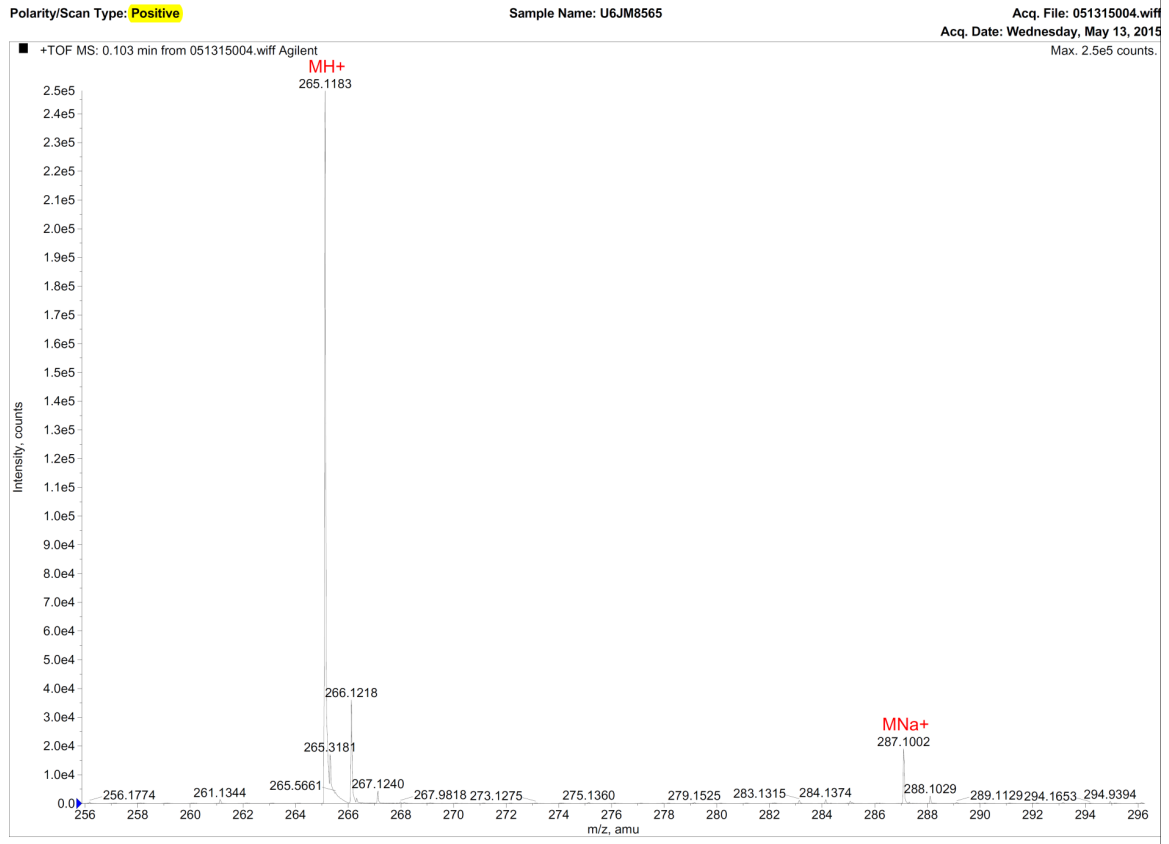

Figure S4. <sup>1</sup>H-NMR spectrum of spinoxazine A (1) in DMSO-d<sub>6</sub>

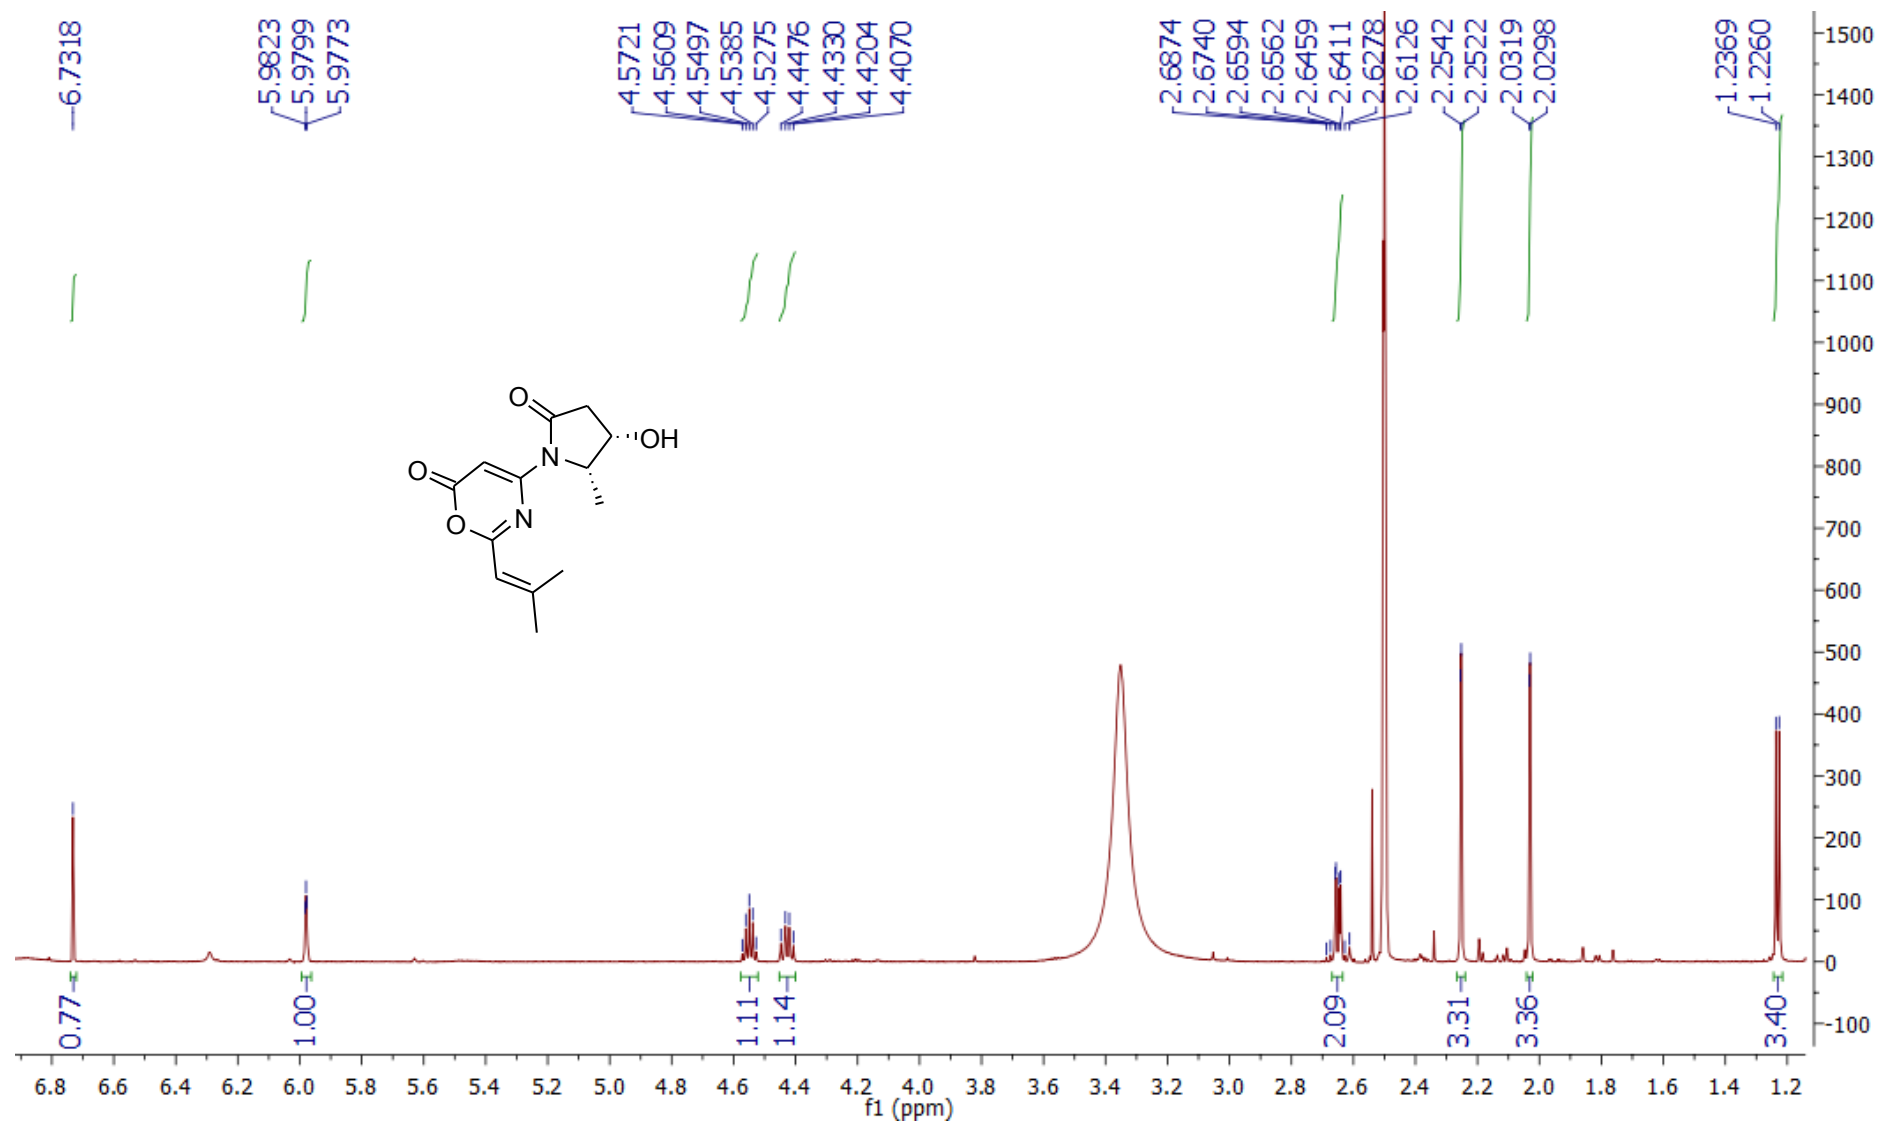

Figure S5.  $^{13}\text{C}$ -NMR spectrum of spinoxazine A (1) in  $\text{DMSO-}d_6$

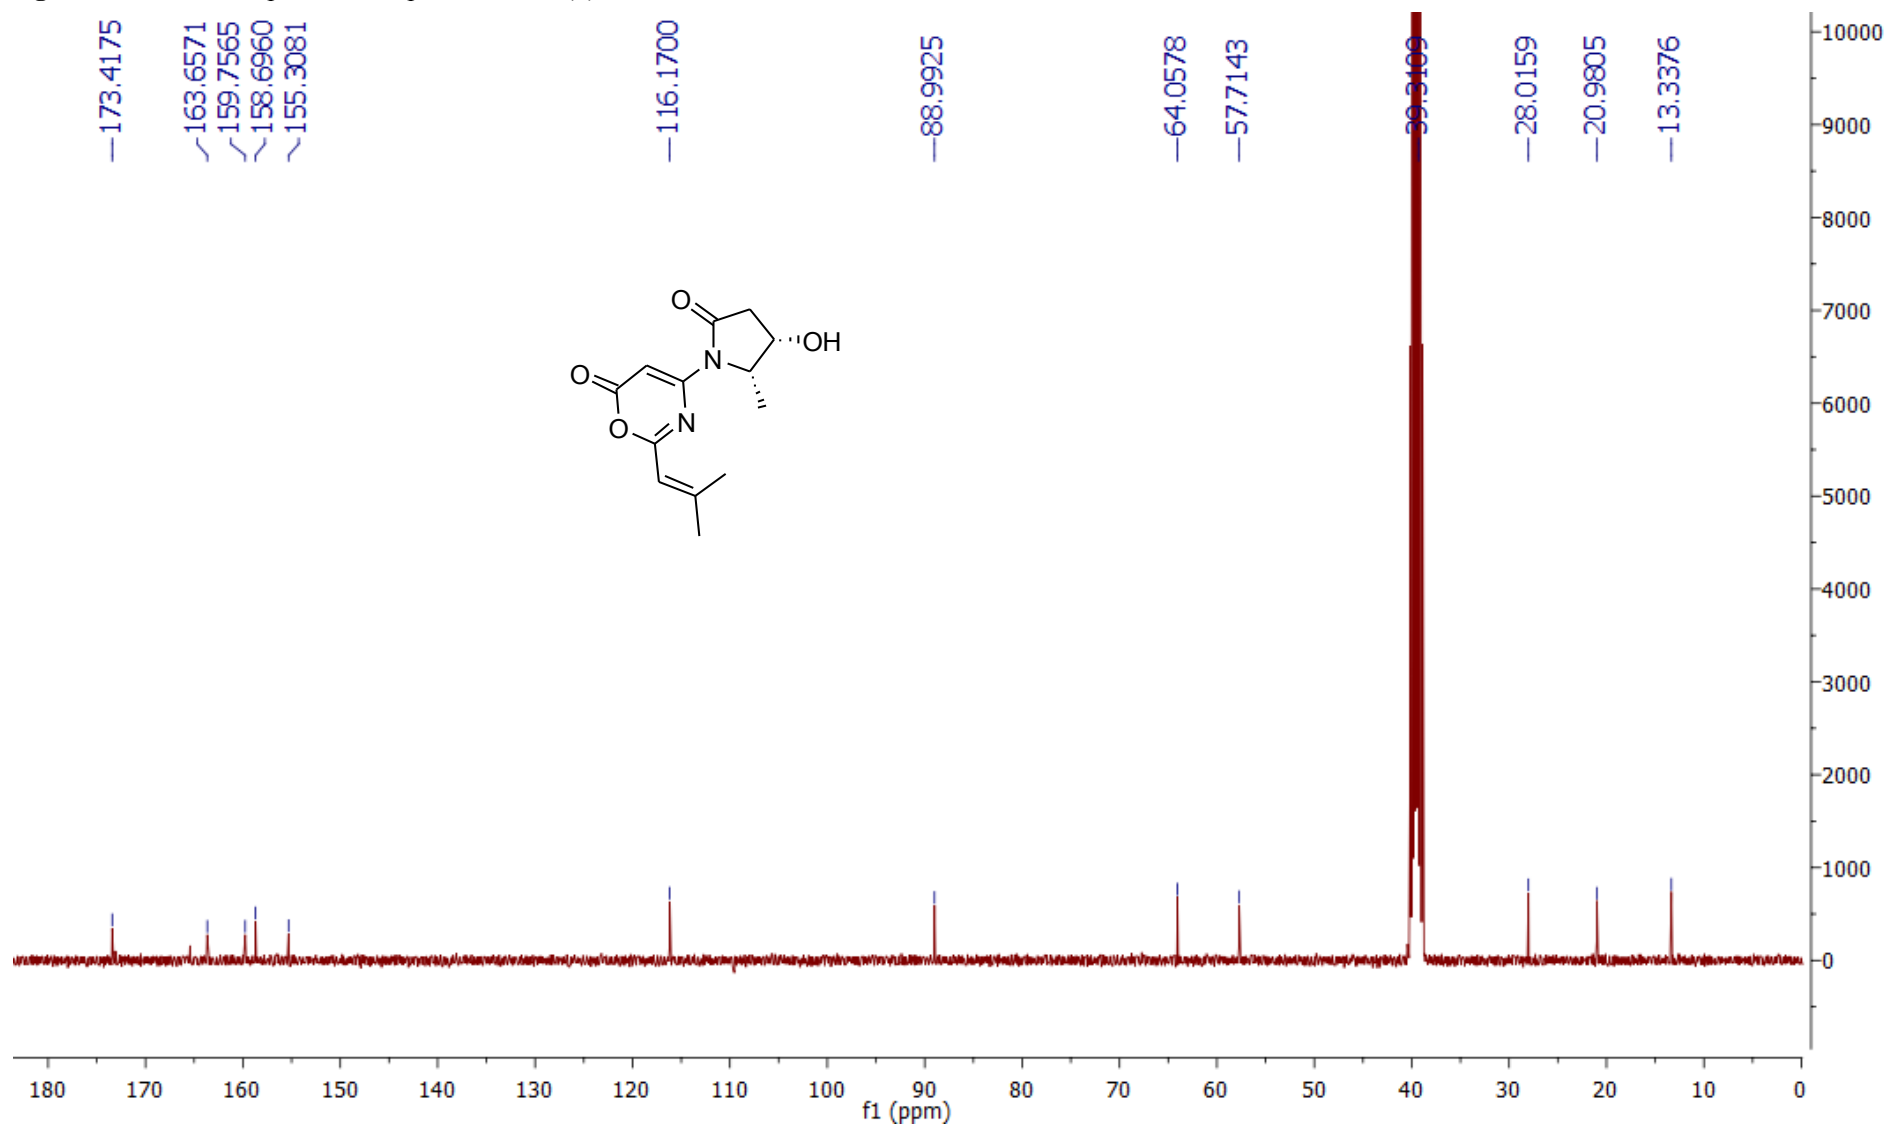



Figure S6. HSQC spectrum of spinoxazine A (1) in DMSO- $d_6$

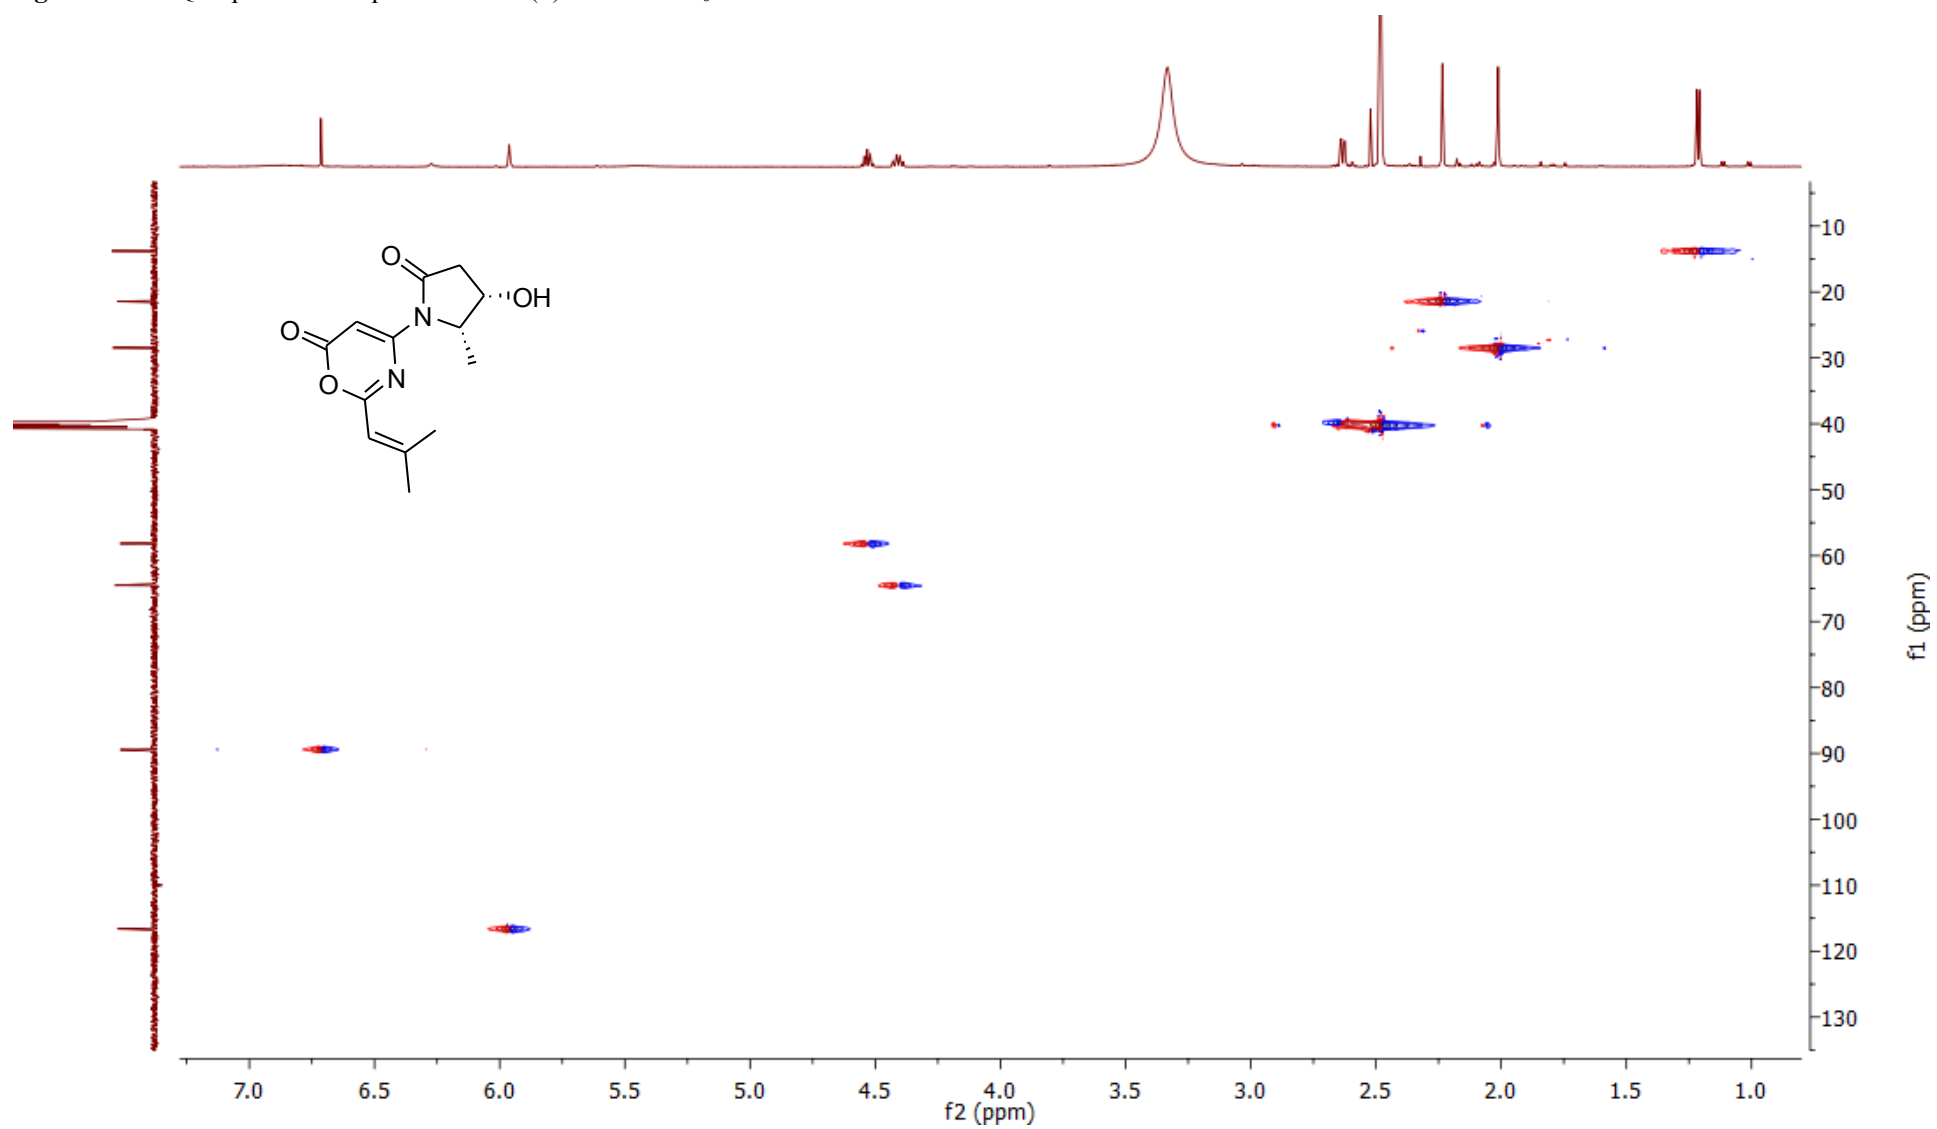

Figure S7.  $^1\text{H}$ - $^1\text{H}$  COSY spectrum of spinoxazine A (1) in  $\text{DMSO-}d_6$

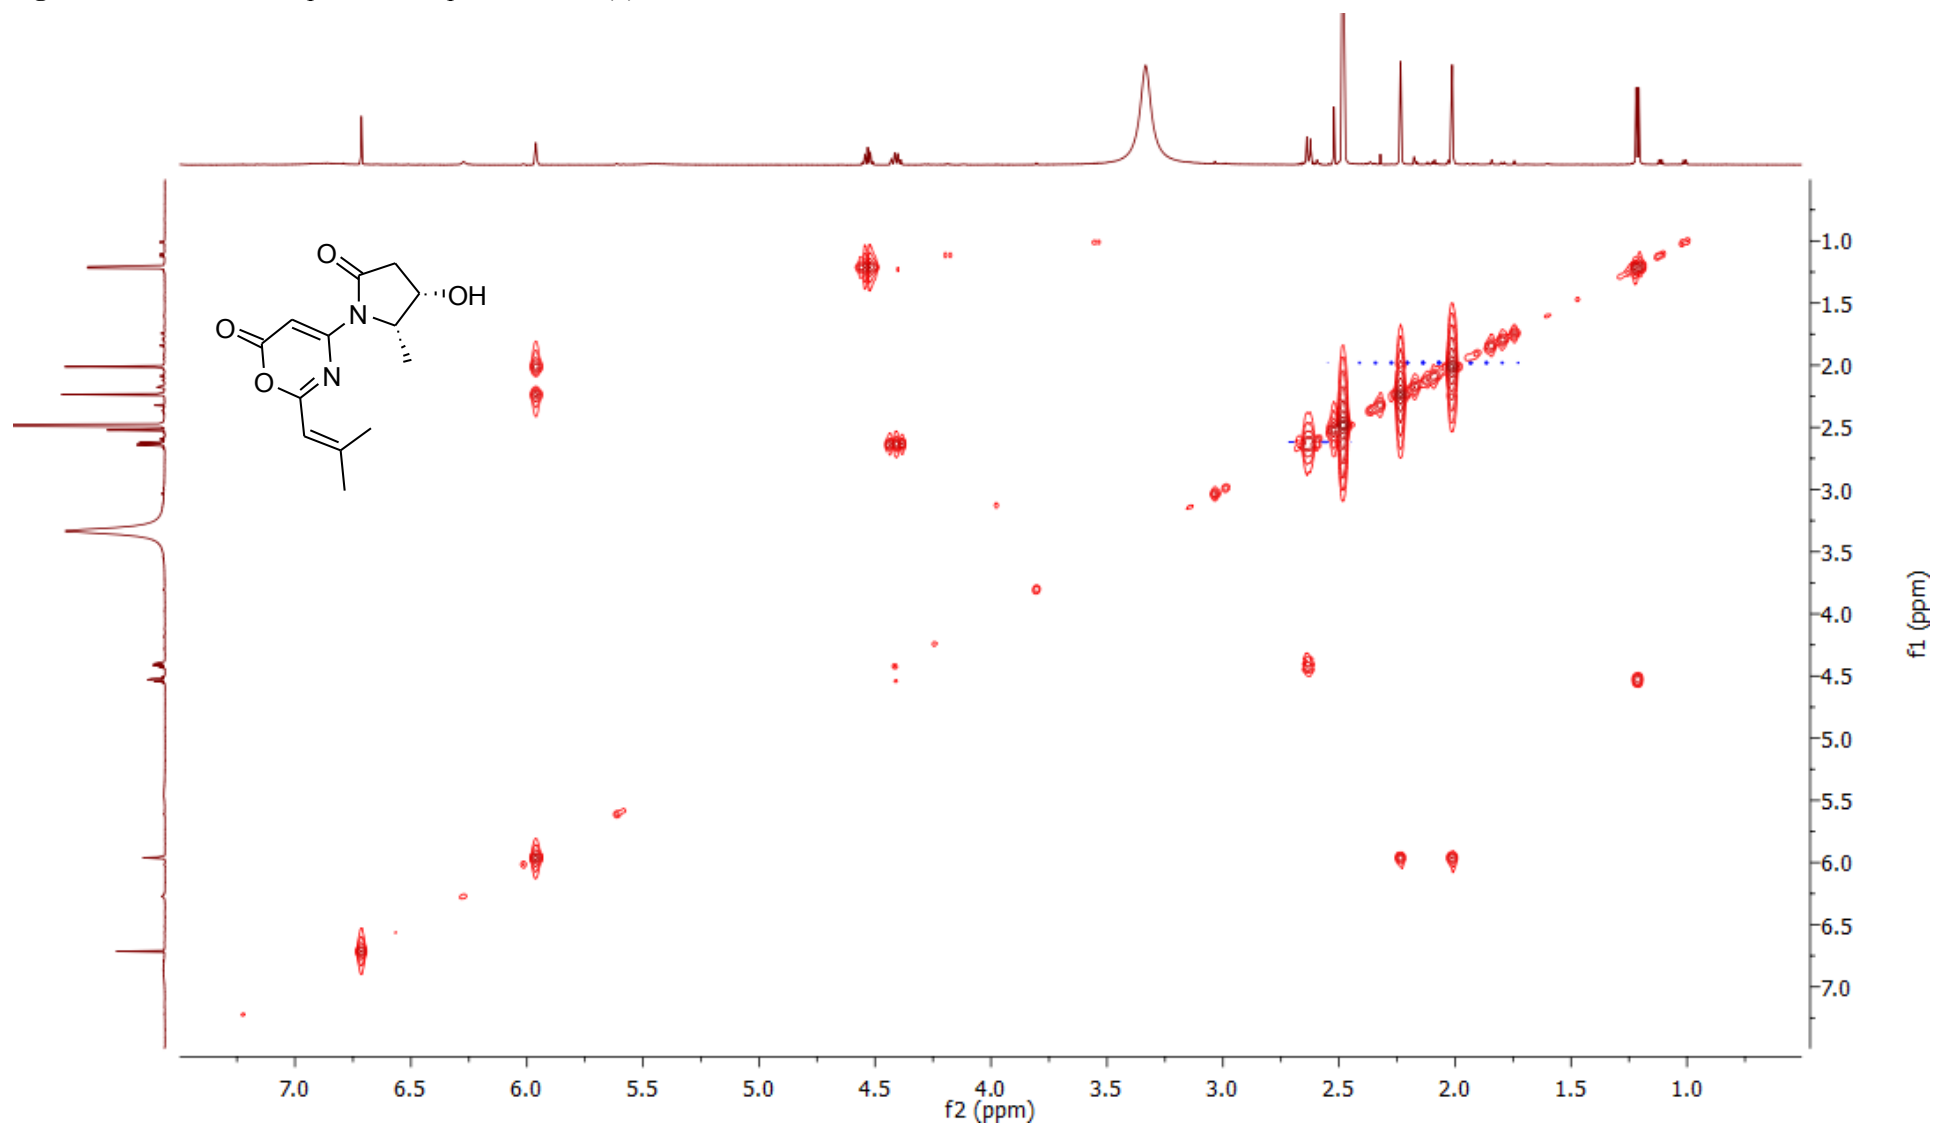

Figure S8. HMBC spectrum of spinoxazine A (1) in DMSO- $d_6$

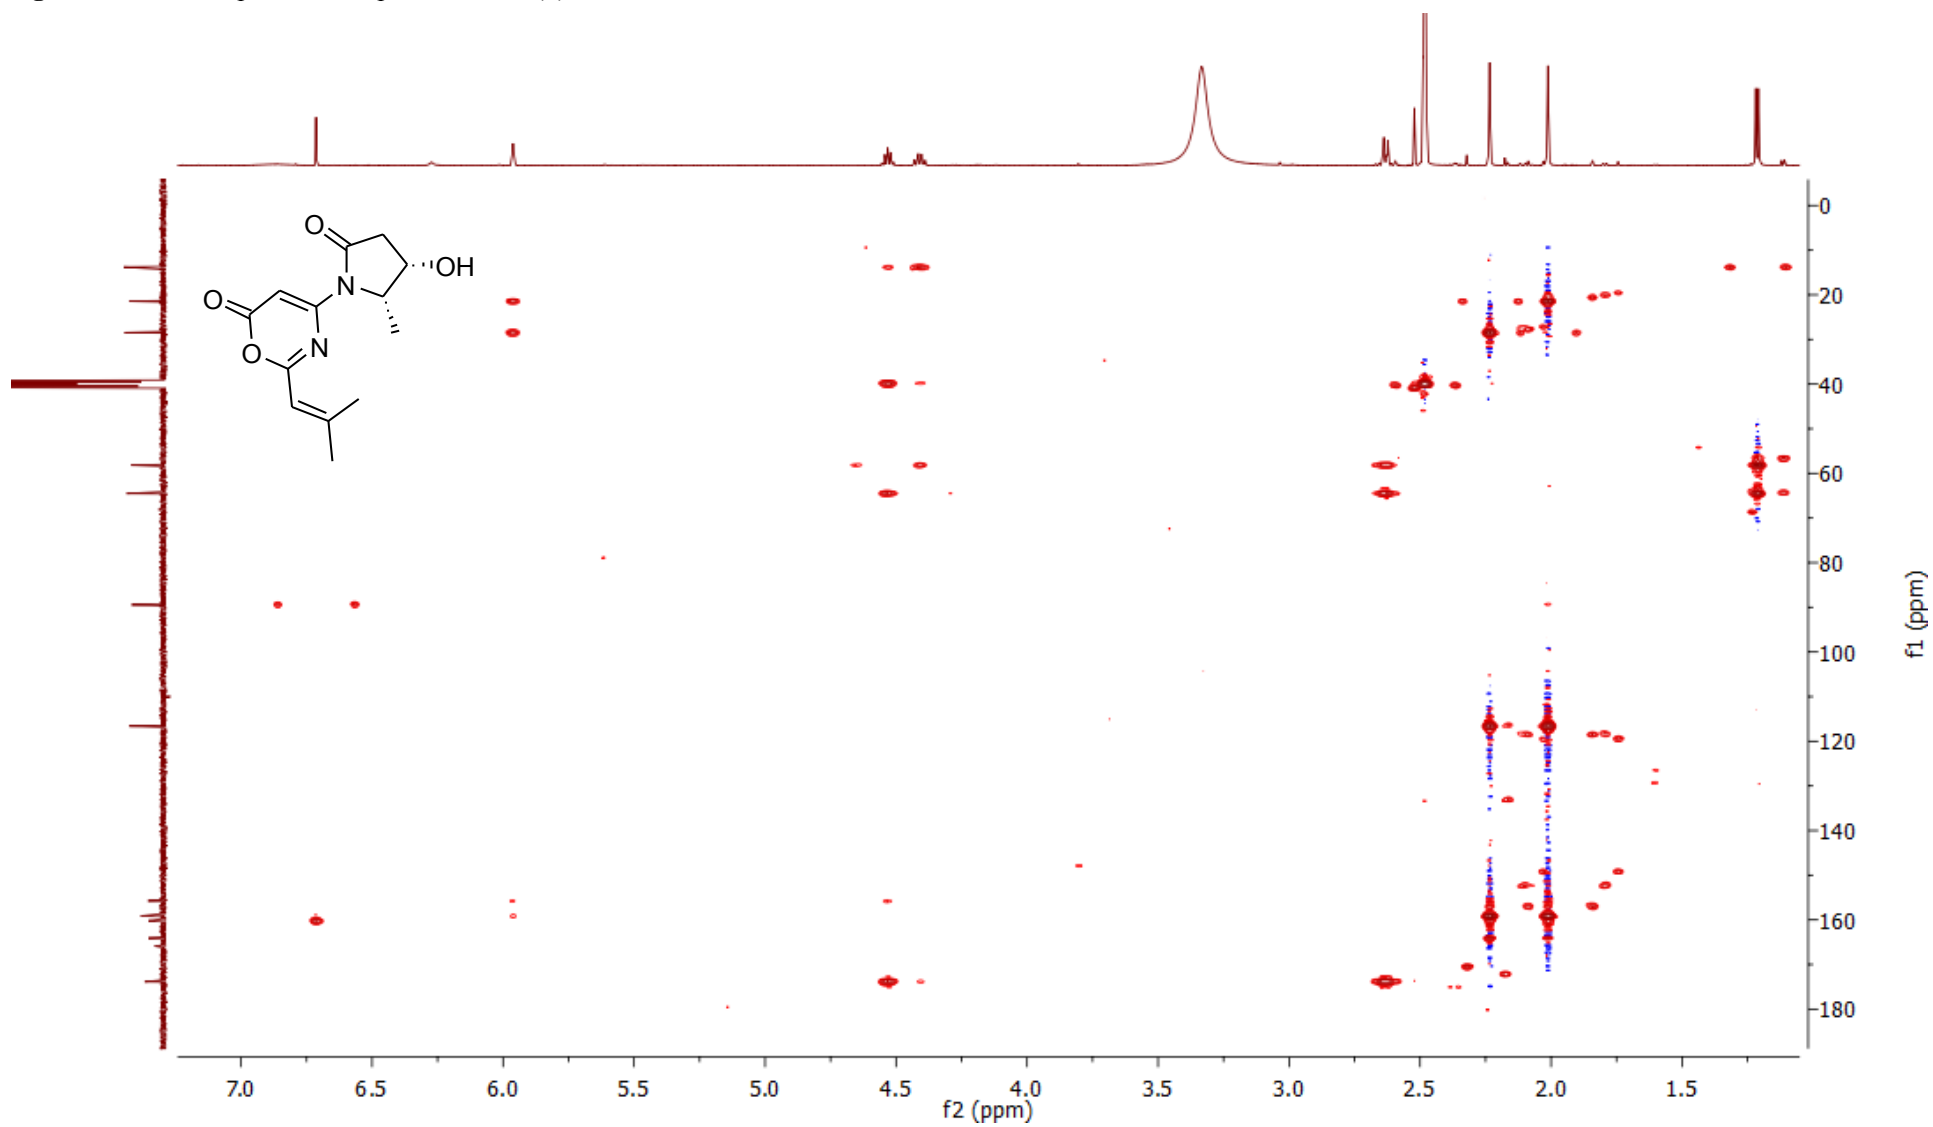

Figure S9. NOESY spectrum of spinoxazine A (1) in DMSO- $d_6$

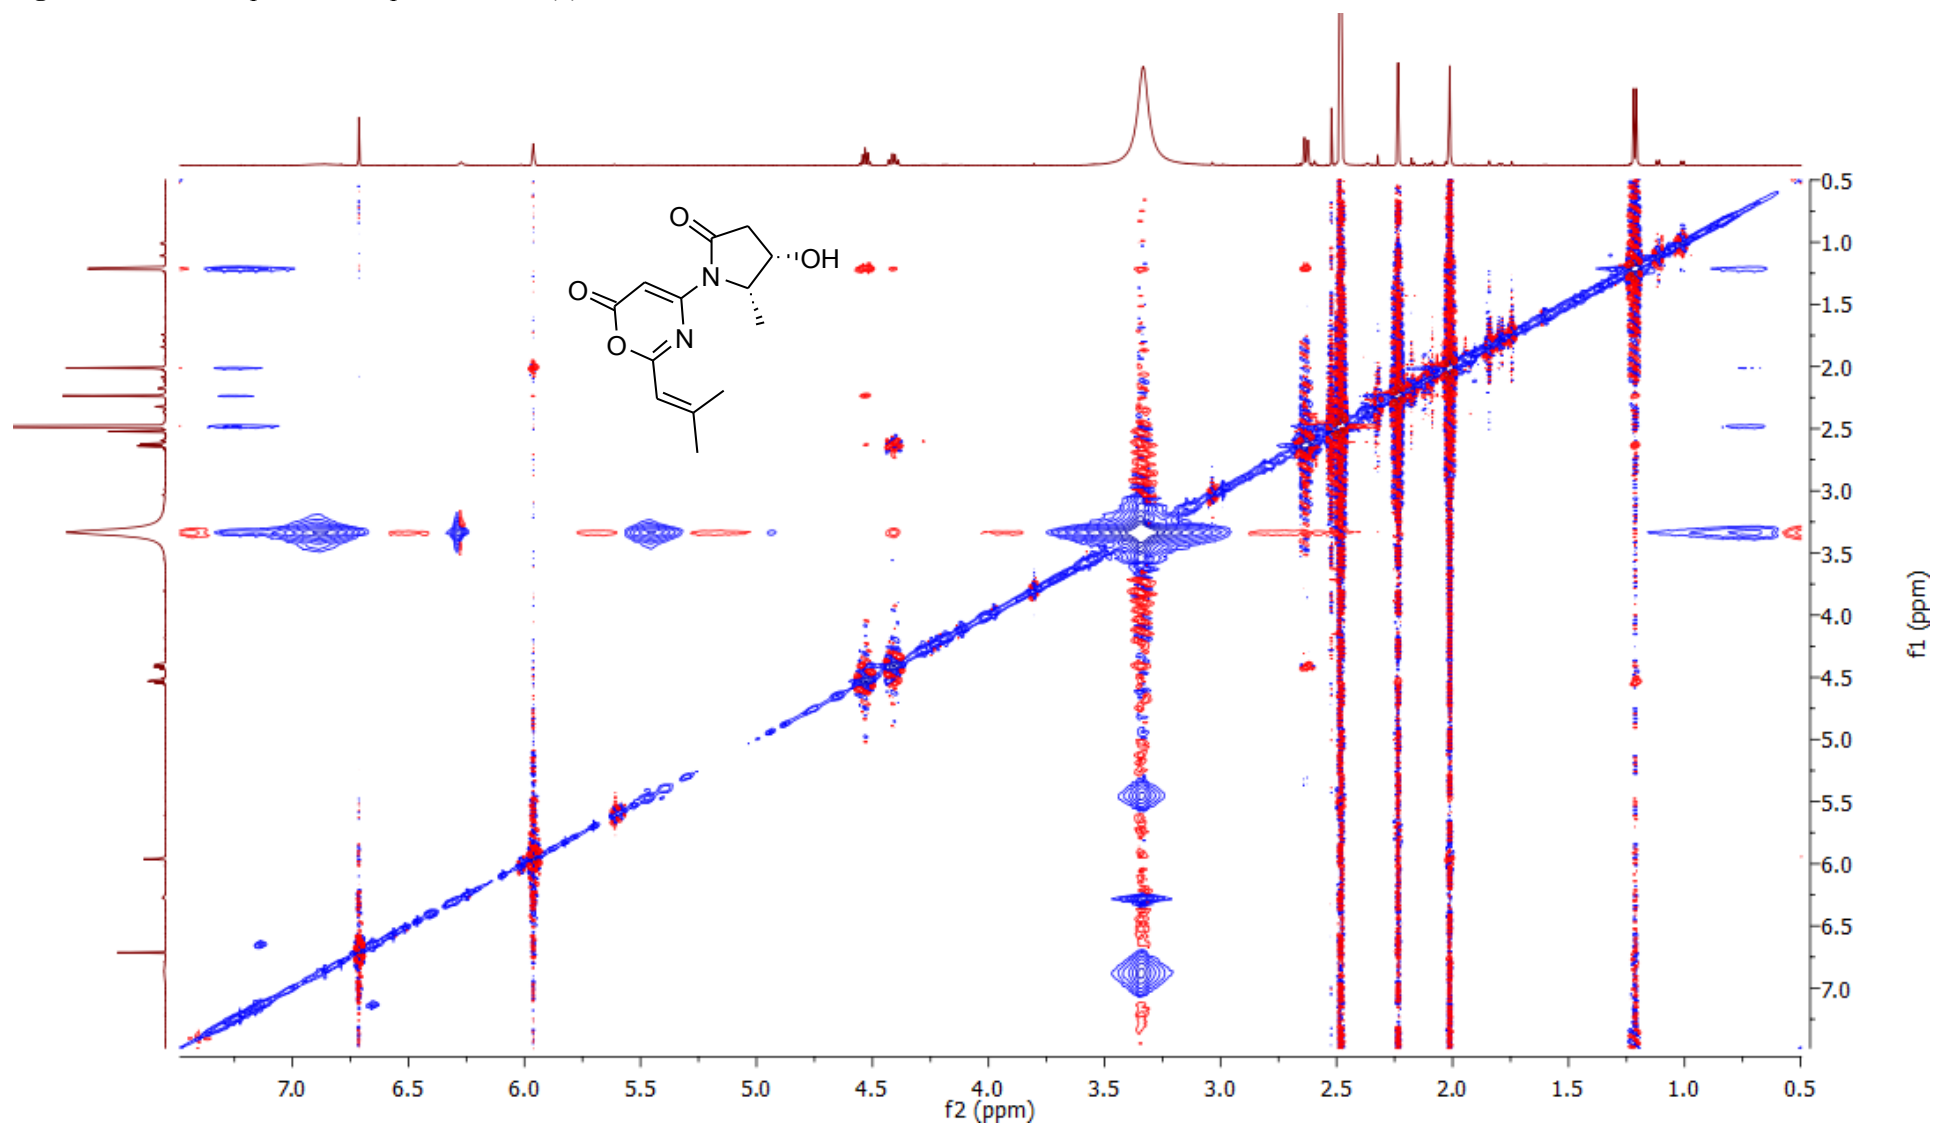

Figure S10. HRESIMS spectrum of spinoxazine B (2)

Polarity/Scan Type: **Positive**

Sample Name: U6JM8648

Acq. File: 052215\_A107.wiff  
Acq. Date: Friday, May 22, 2015

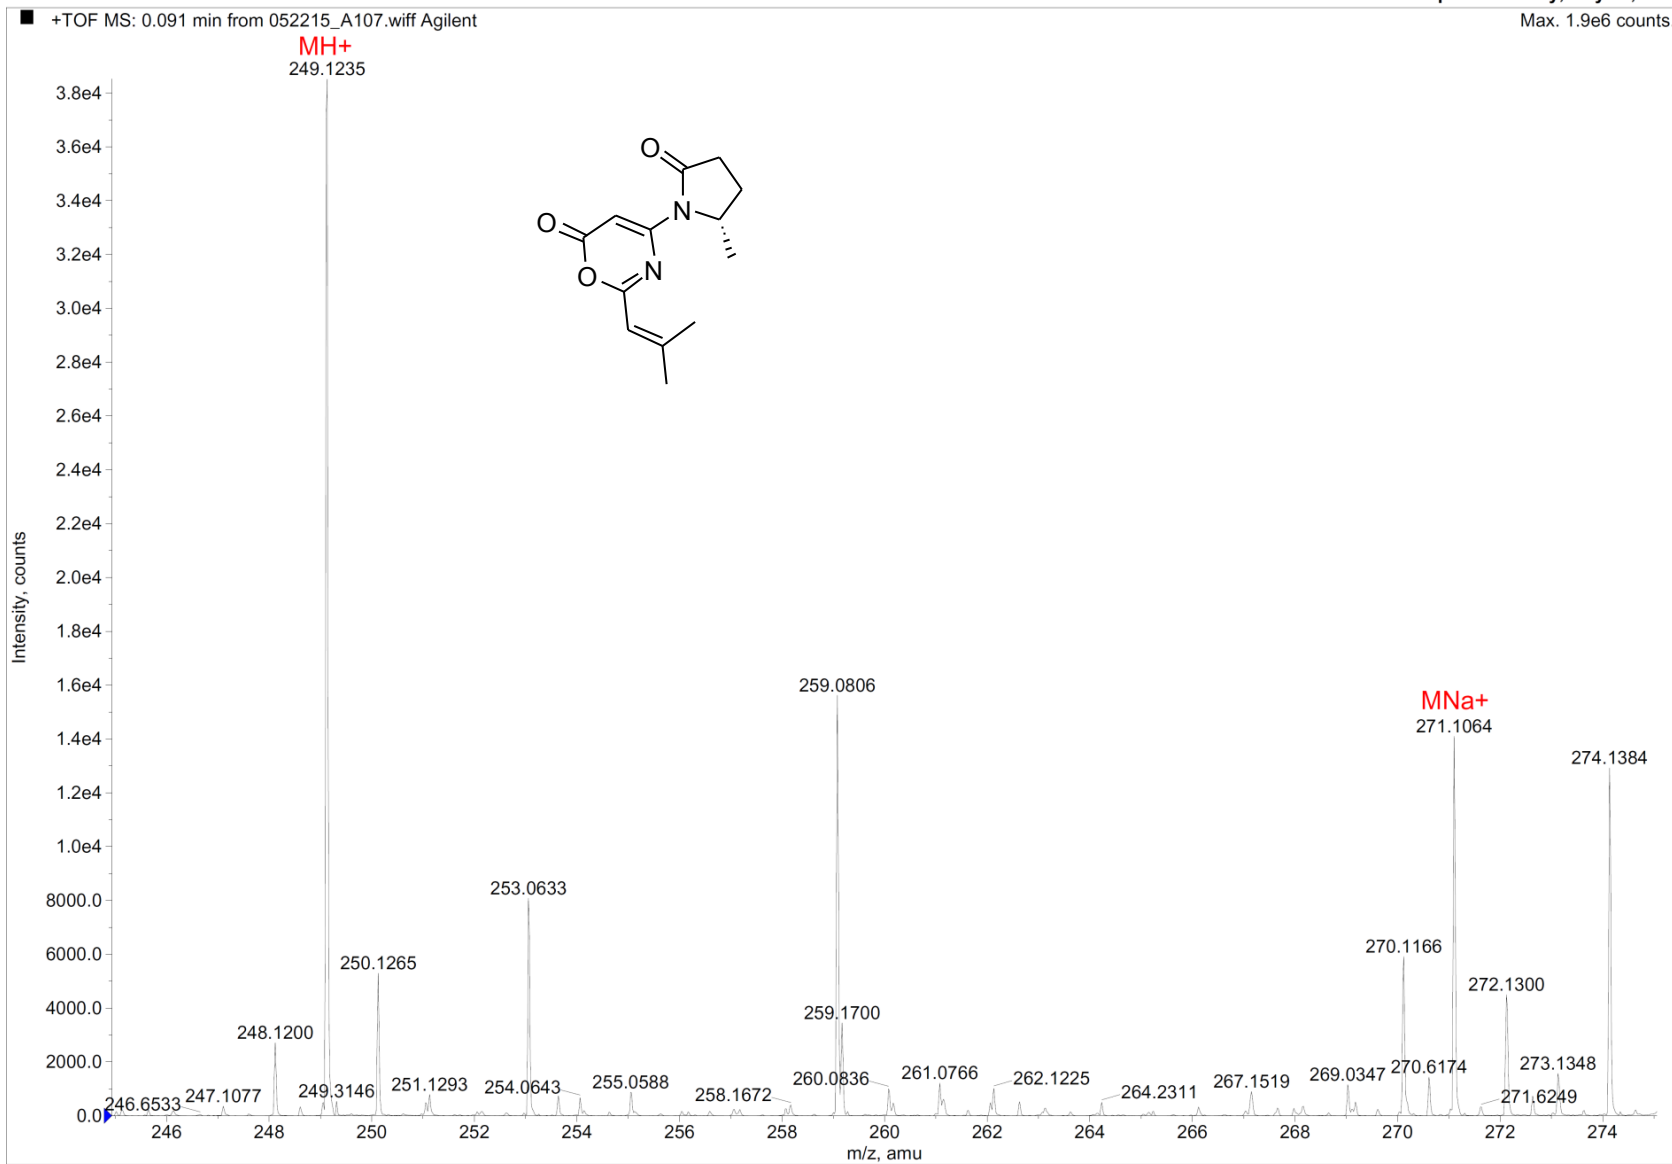

Figure S11. <sup>1</sup>H-NMR spectrum of spinoxazine B (2) in DMSO-*d*<sub>6</sub>

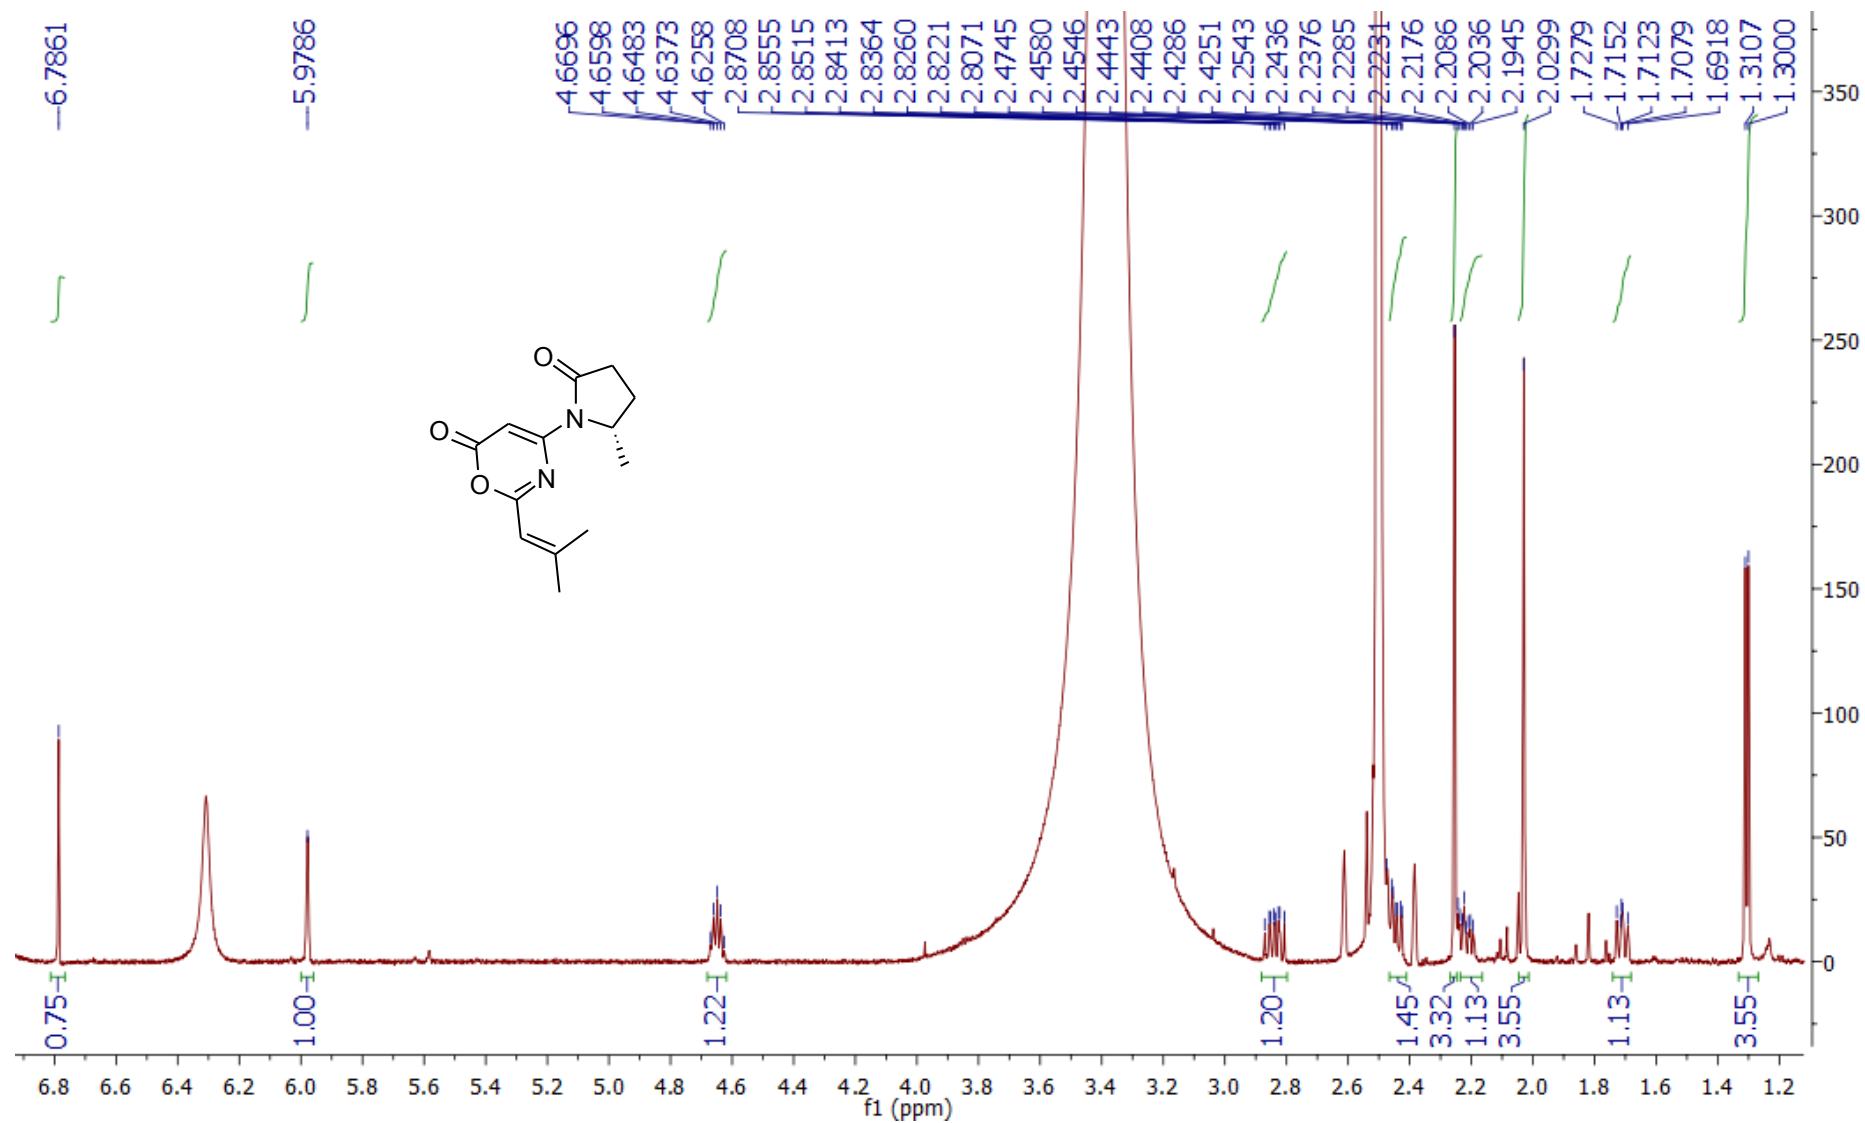

Figure S12.  $^{13}\text{C}$ -NMR spectrum of spinoxazine B (2) in  $\text{DMSO-}d_6$

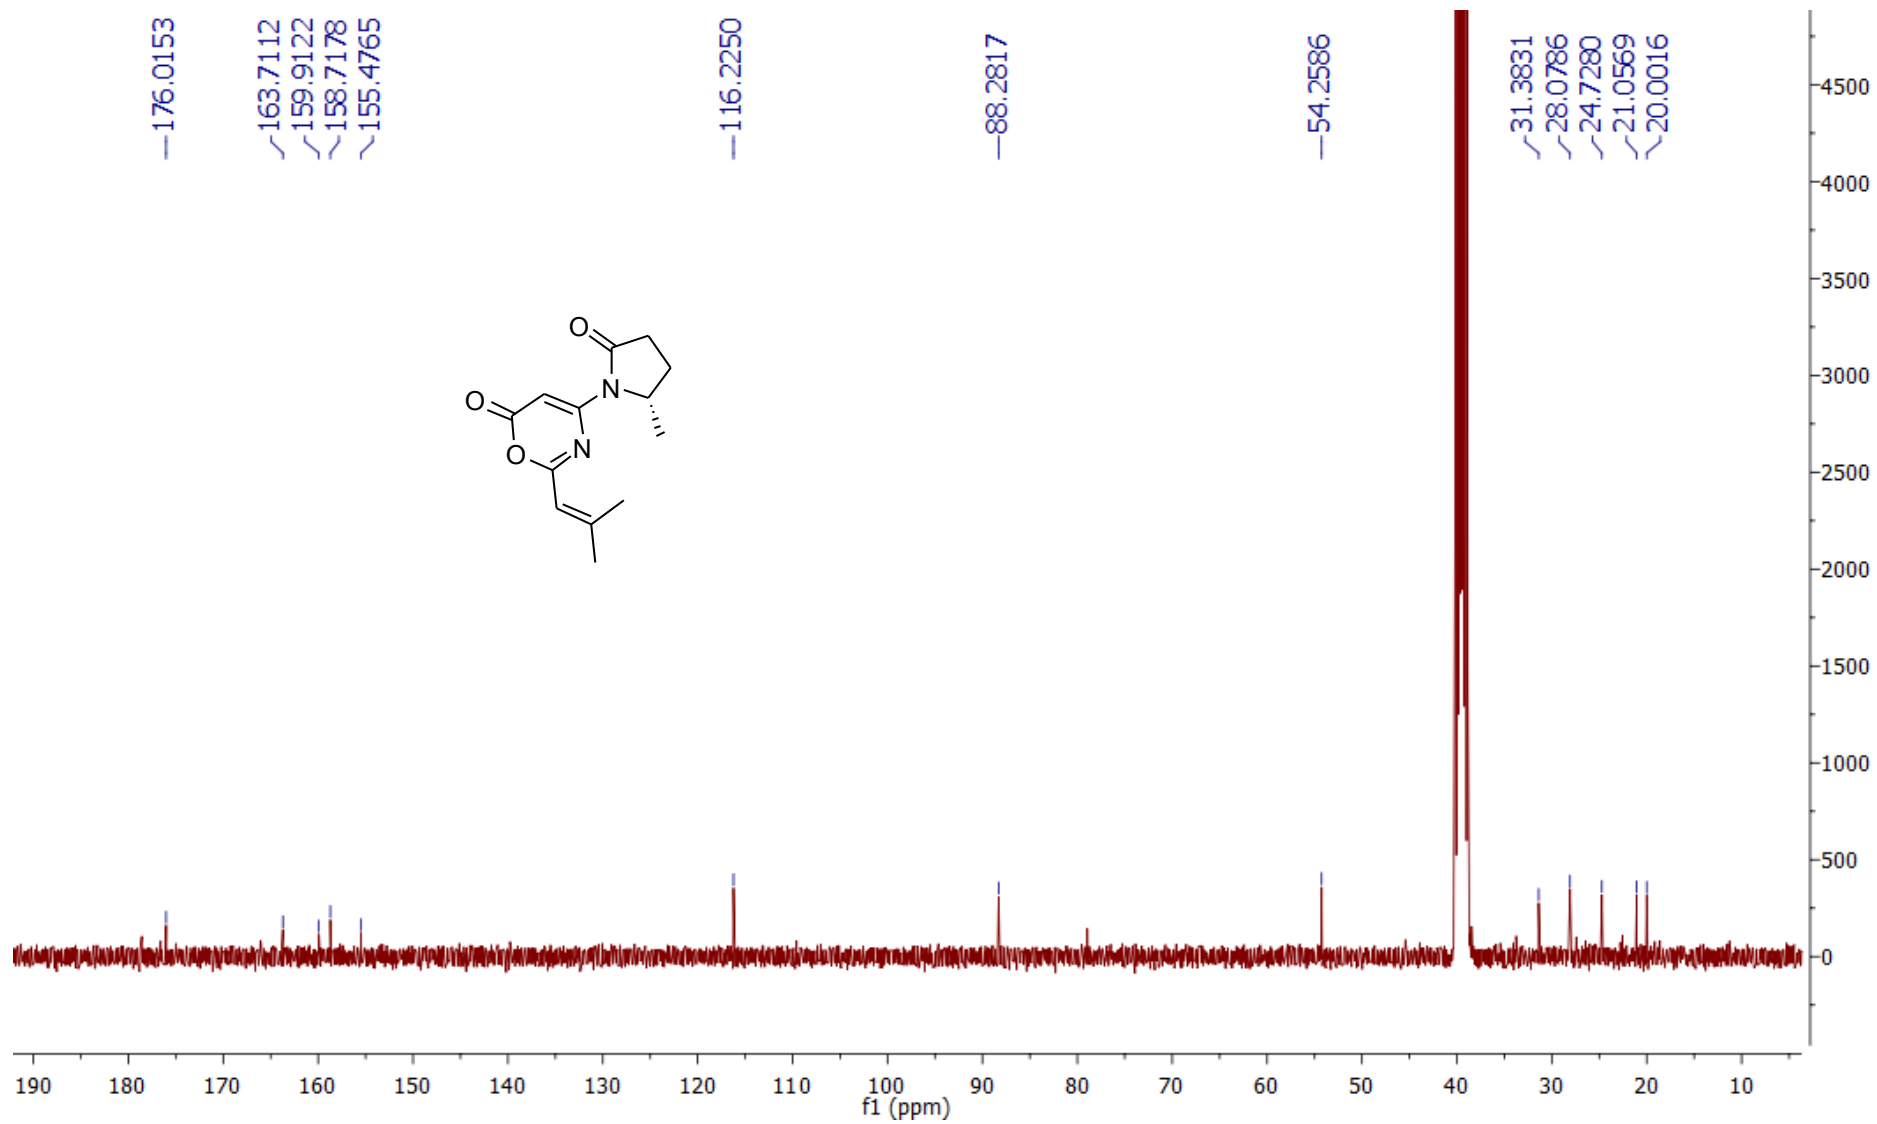

Figure S13. HSQC spectrum of spinoxazine B (2) in DMSO- $d_6$

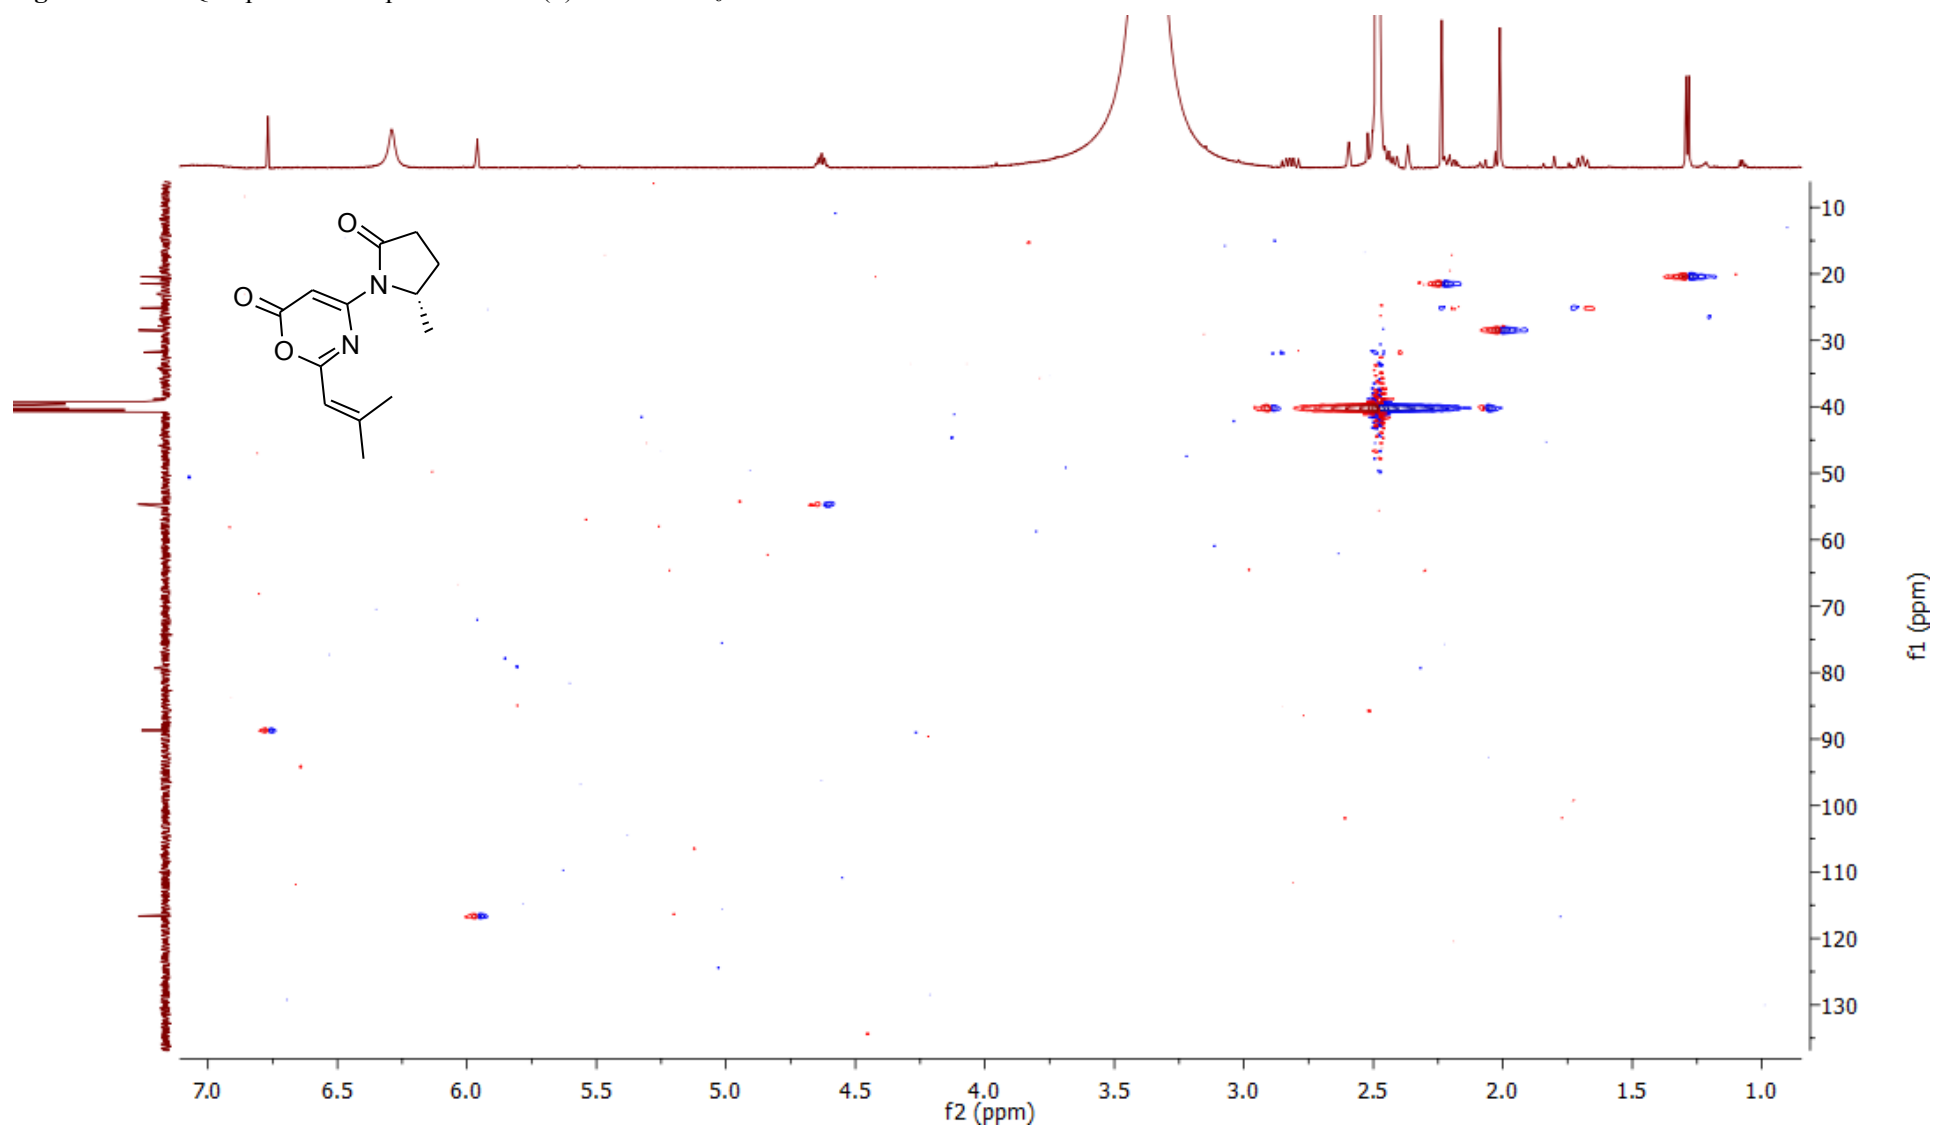



Figure S14.  $^1\text{H}$ - $^1\text{H}$  COSY spectrum of spinoxazine B (2) in  $\text{DMSO-}d_6$

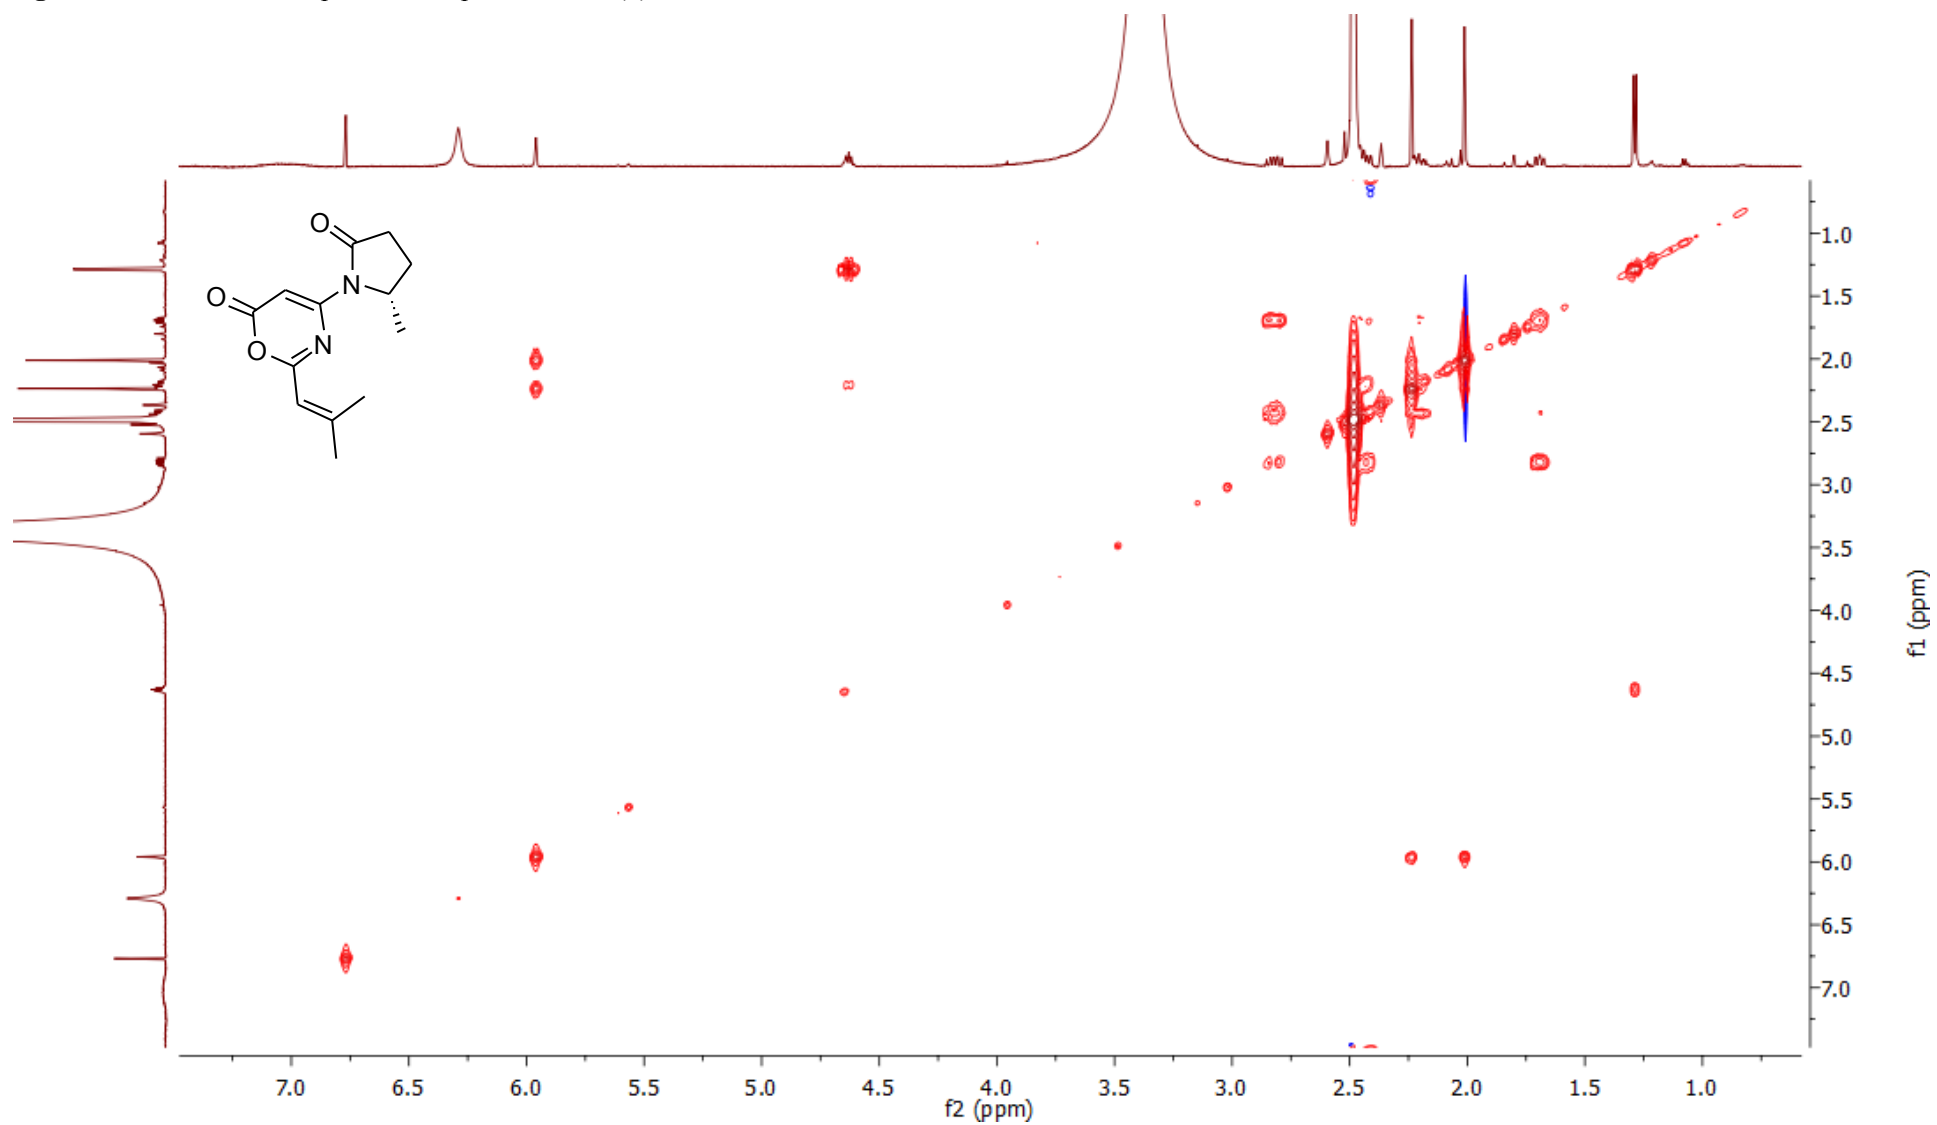

Figure S15. HMBC spectrum of spinoxazine B (2) in DMSO- $d_6$

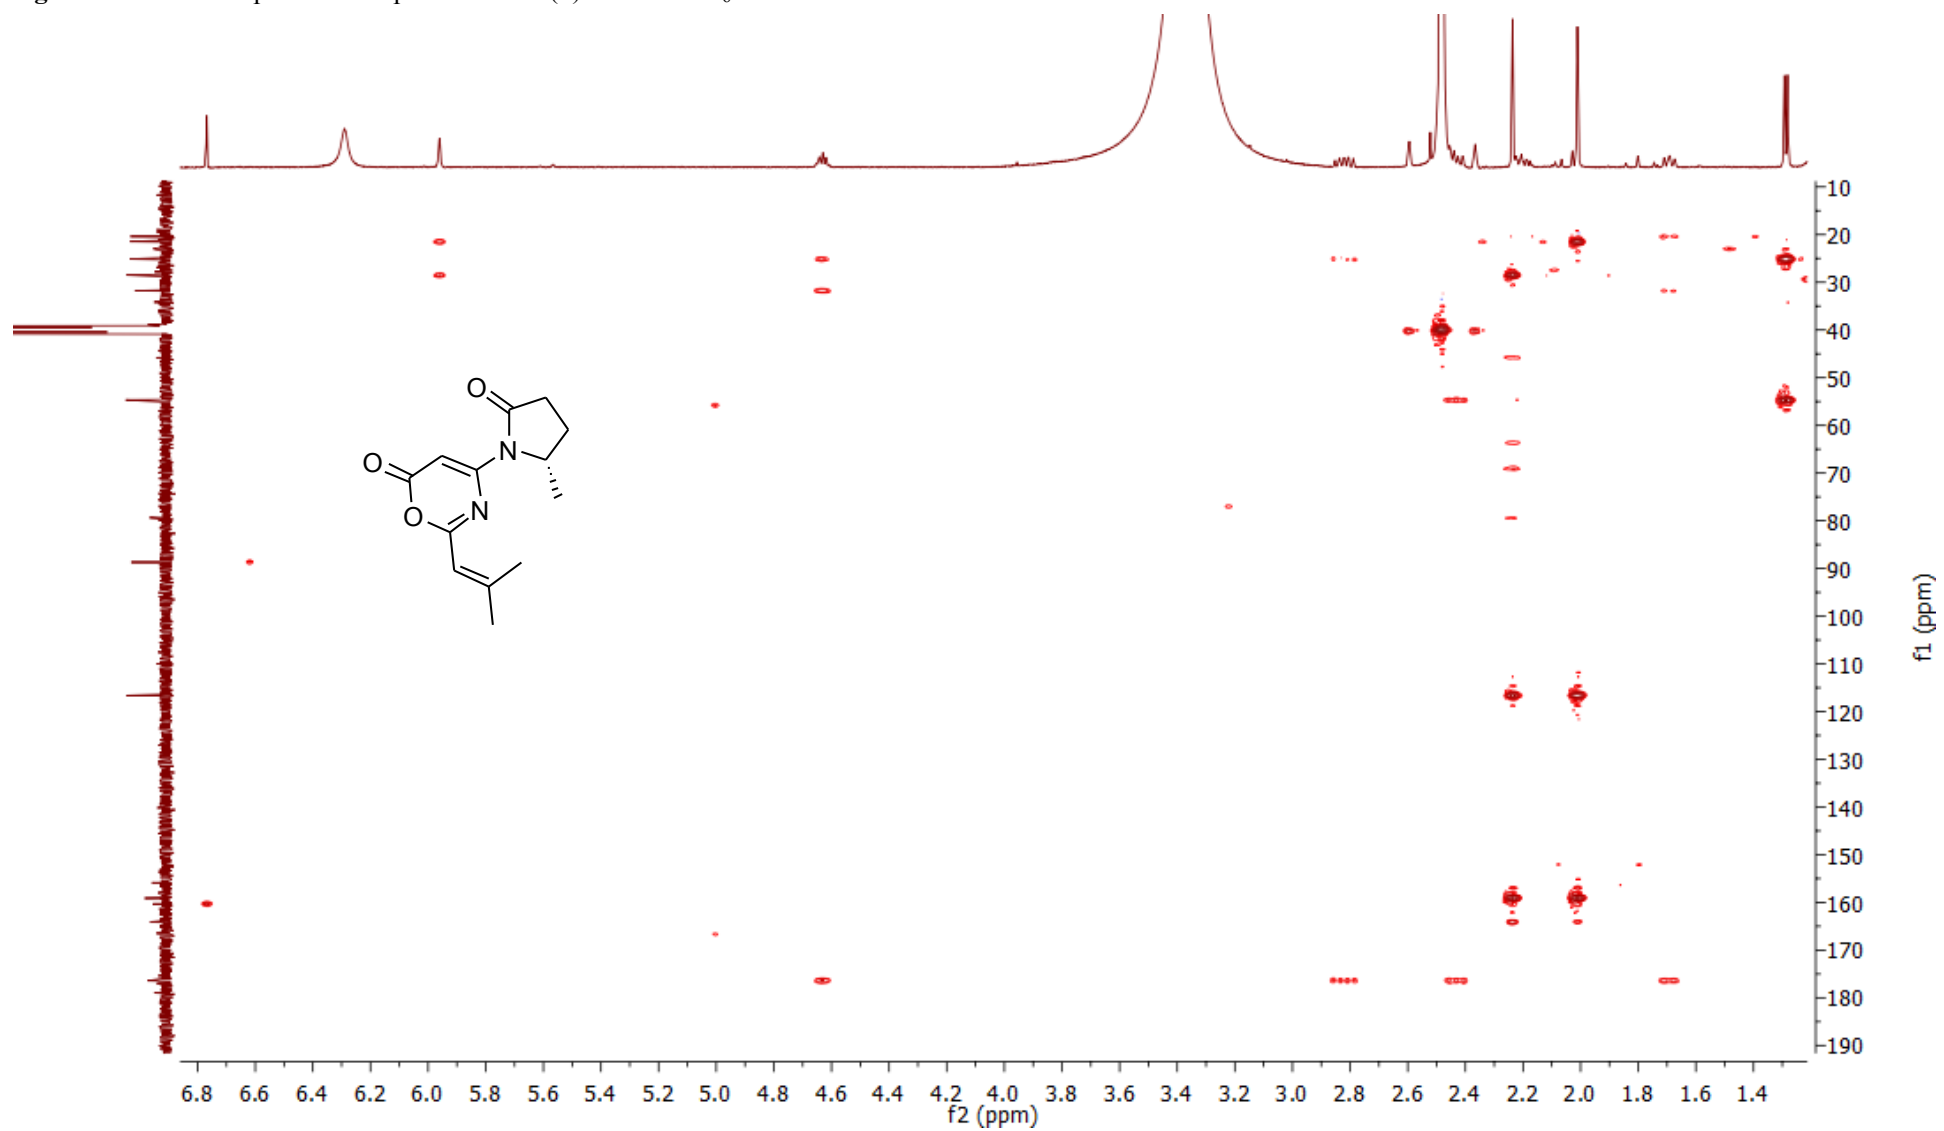

Figure S16. HRESIMS spectrum of bohemamine D (3)

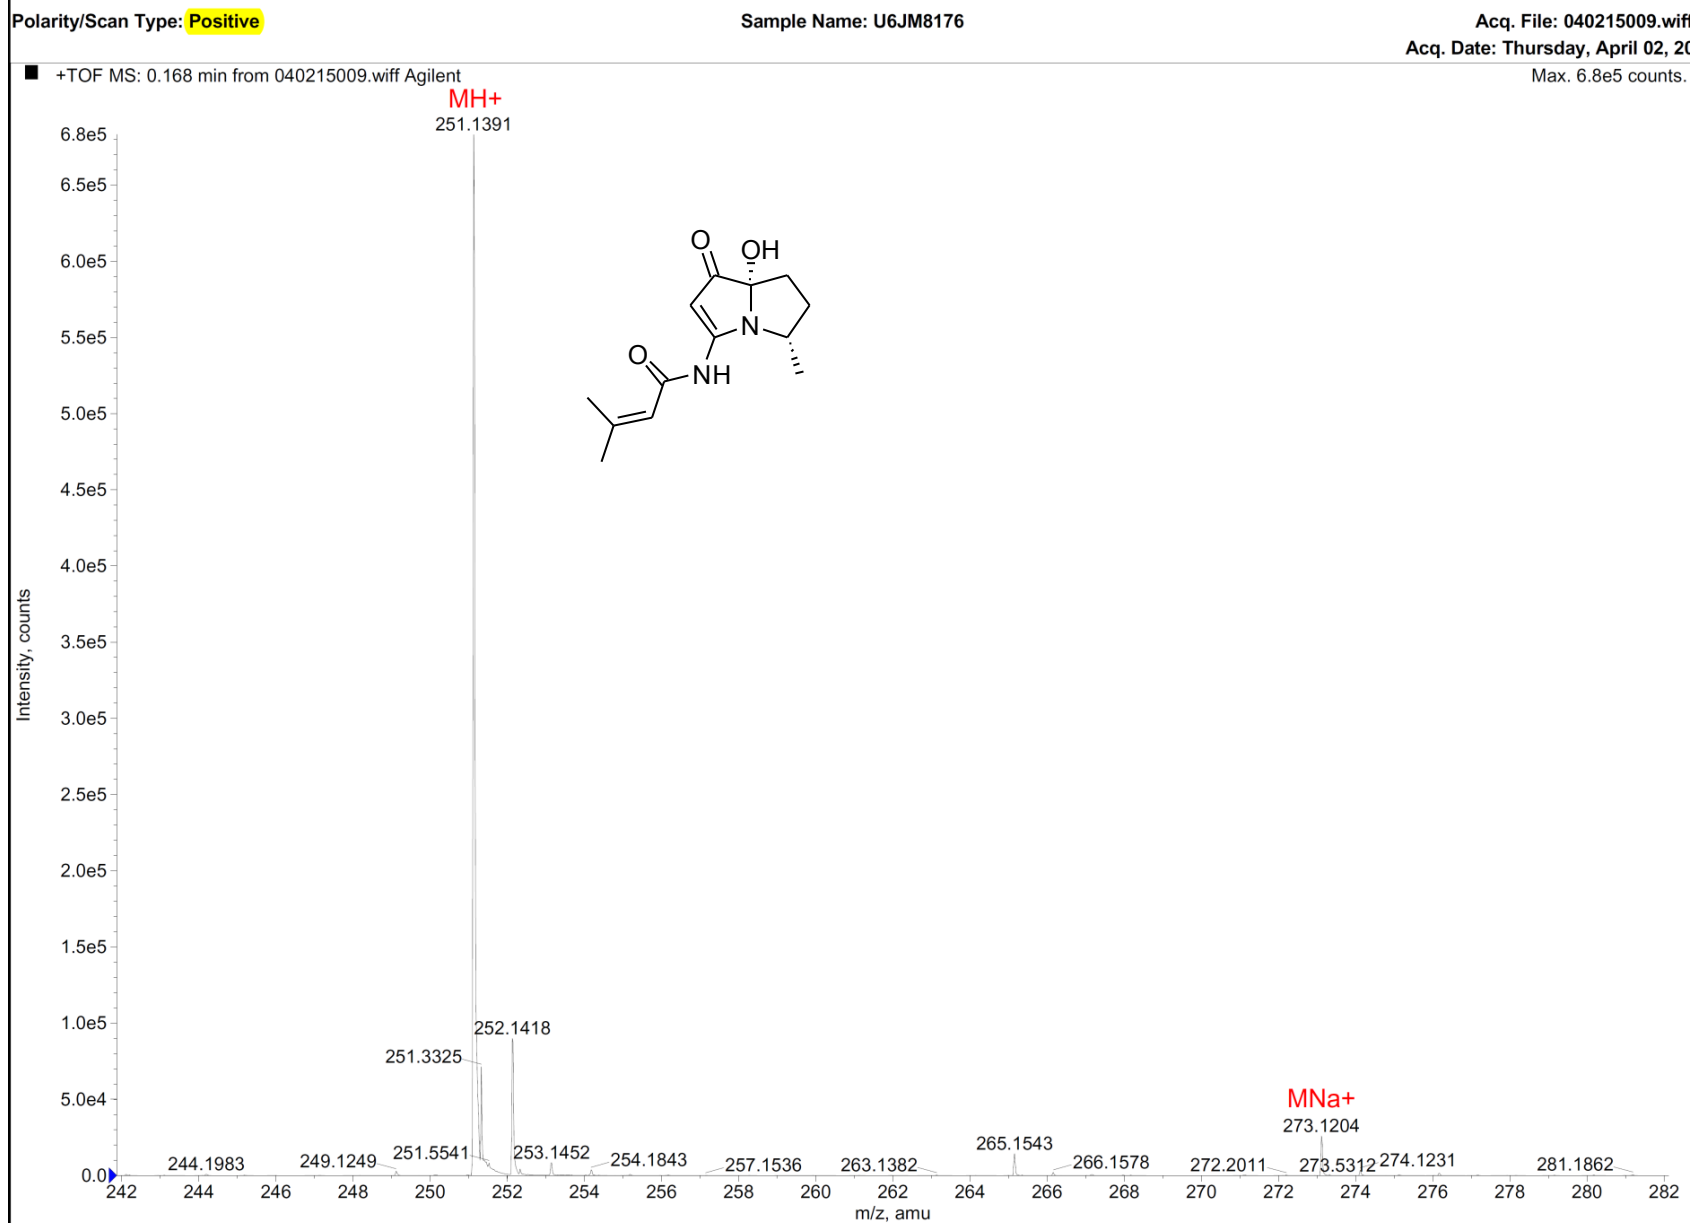

Figure S17. <sup>1</sup>H-NMR spectrum of bohemamine D (3) in DMSO-*d*<sub>6</sub>

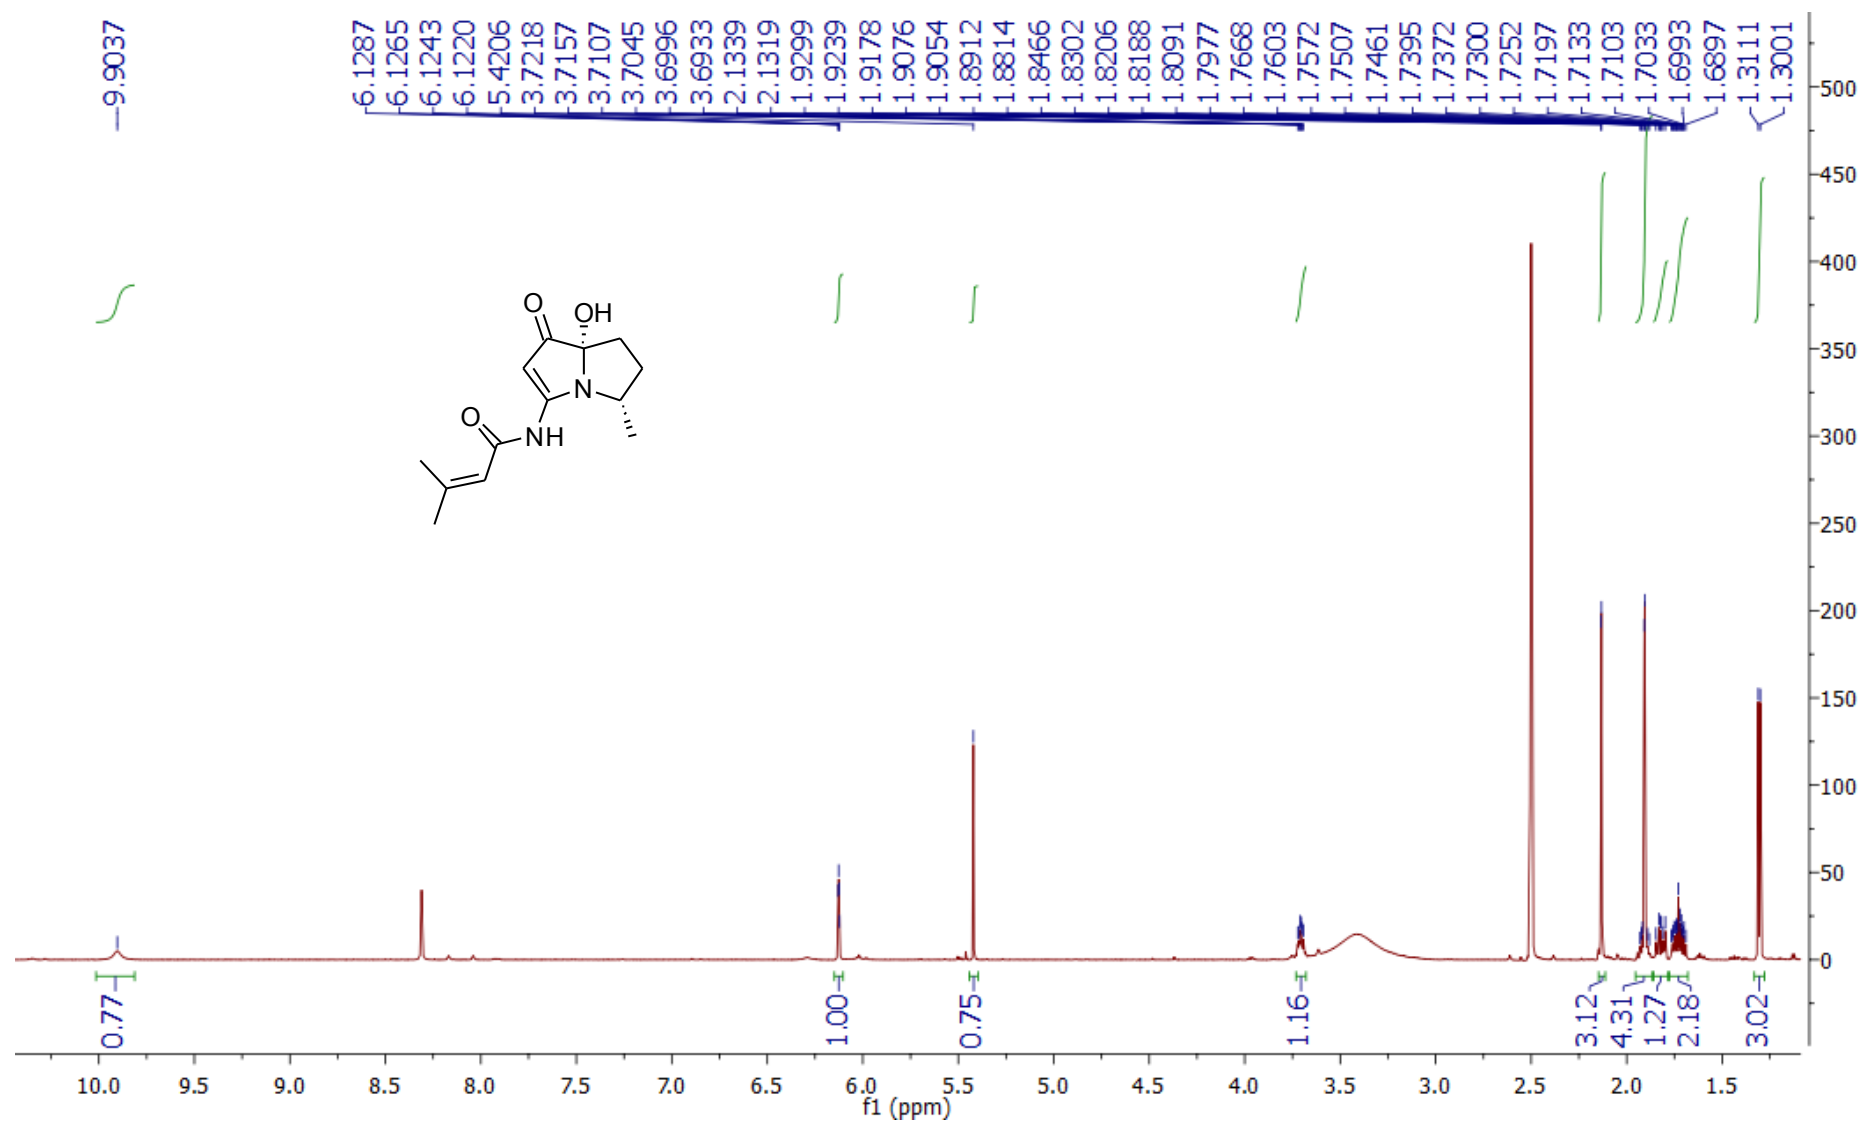

Figure S18.  $^{13}\text{C}$ -NMR spectrum of bohemamine D (**3**) in  $\text{DMSO-}d_6$

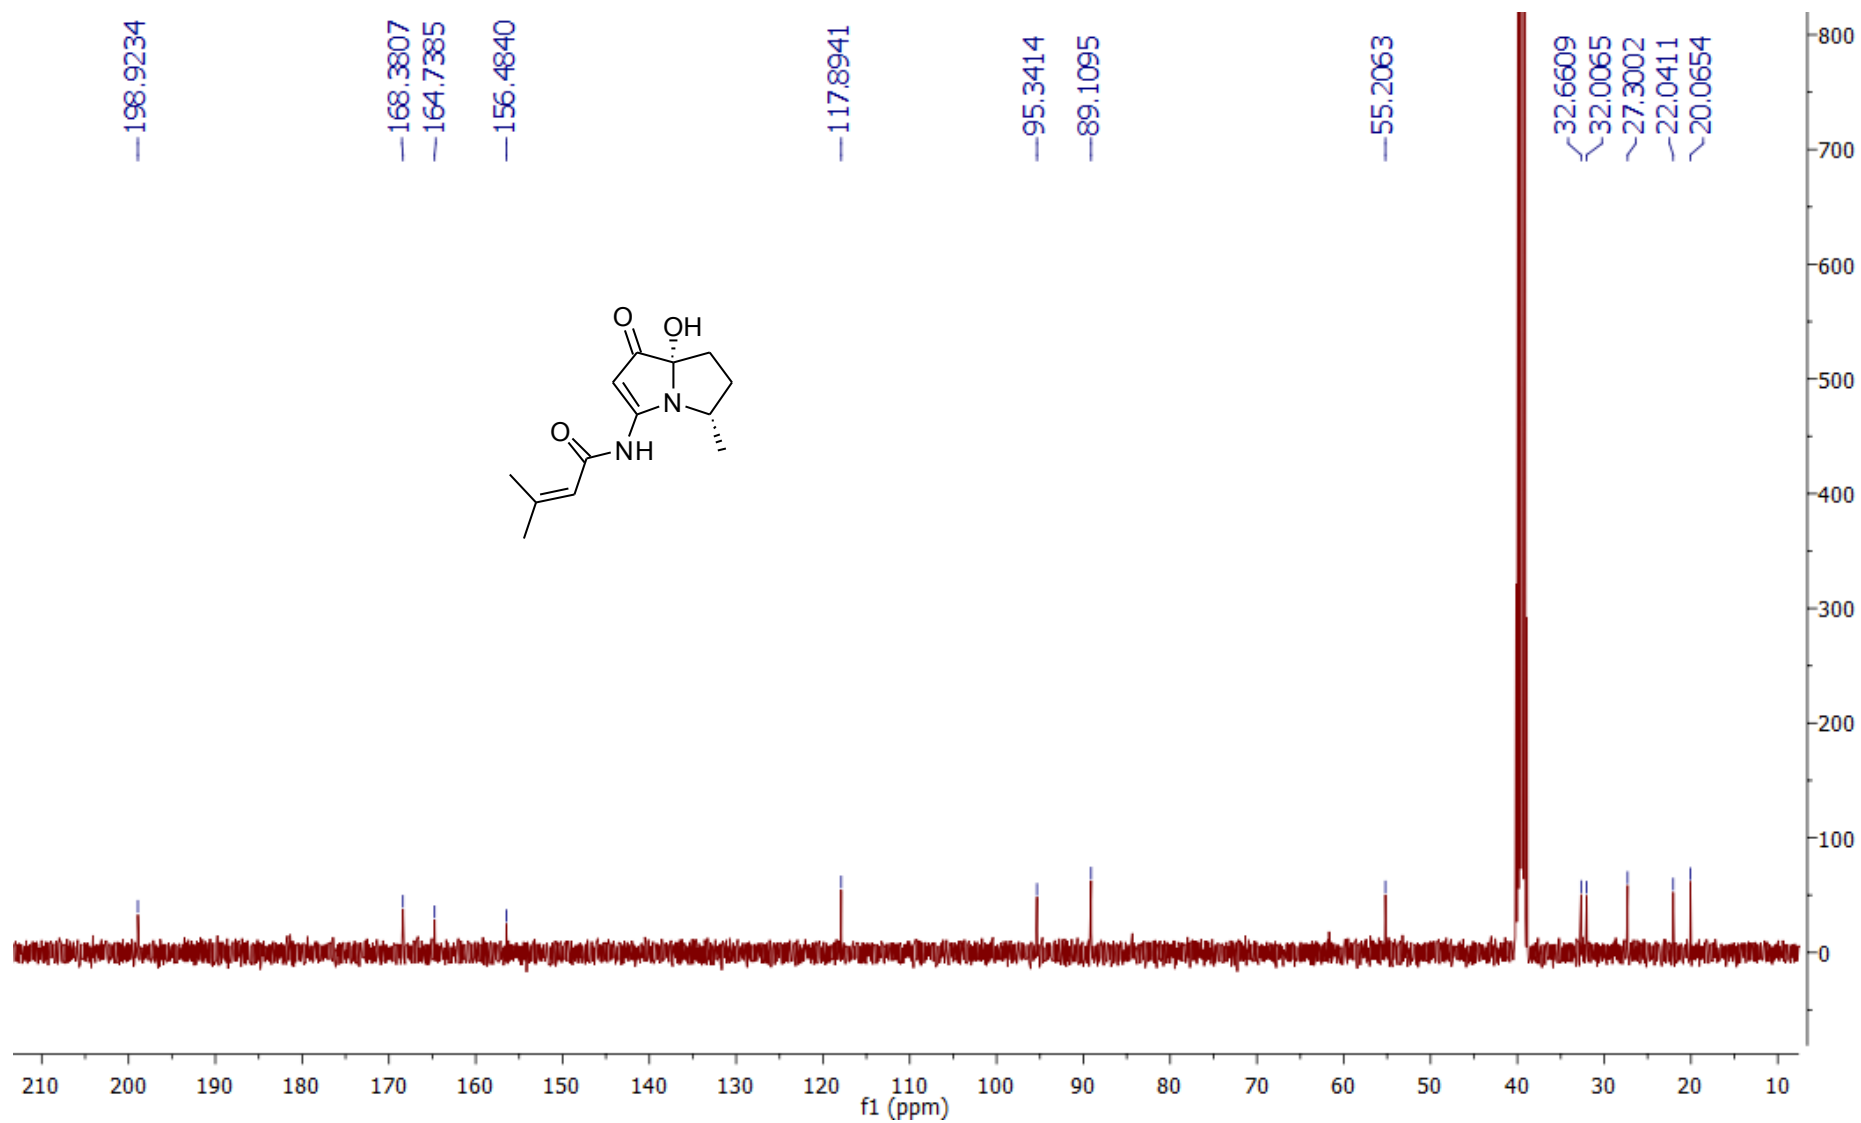

Figure S19. HSQC spectrum of bohemamine D (3) in DMSO-*d*<sub>6</sub>

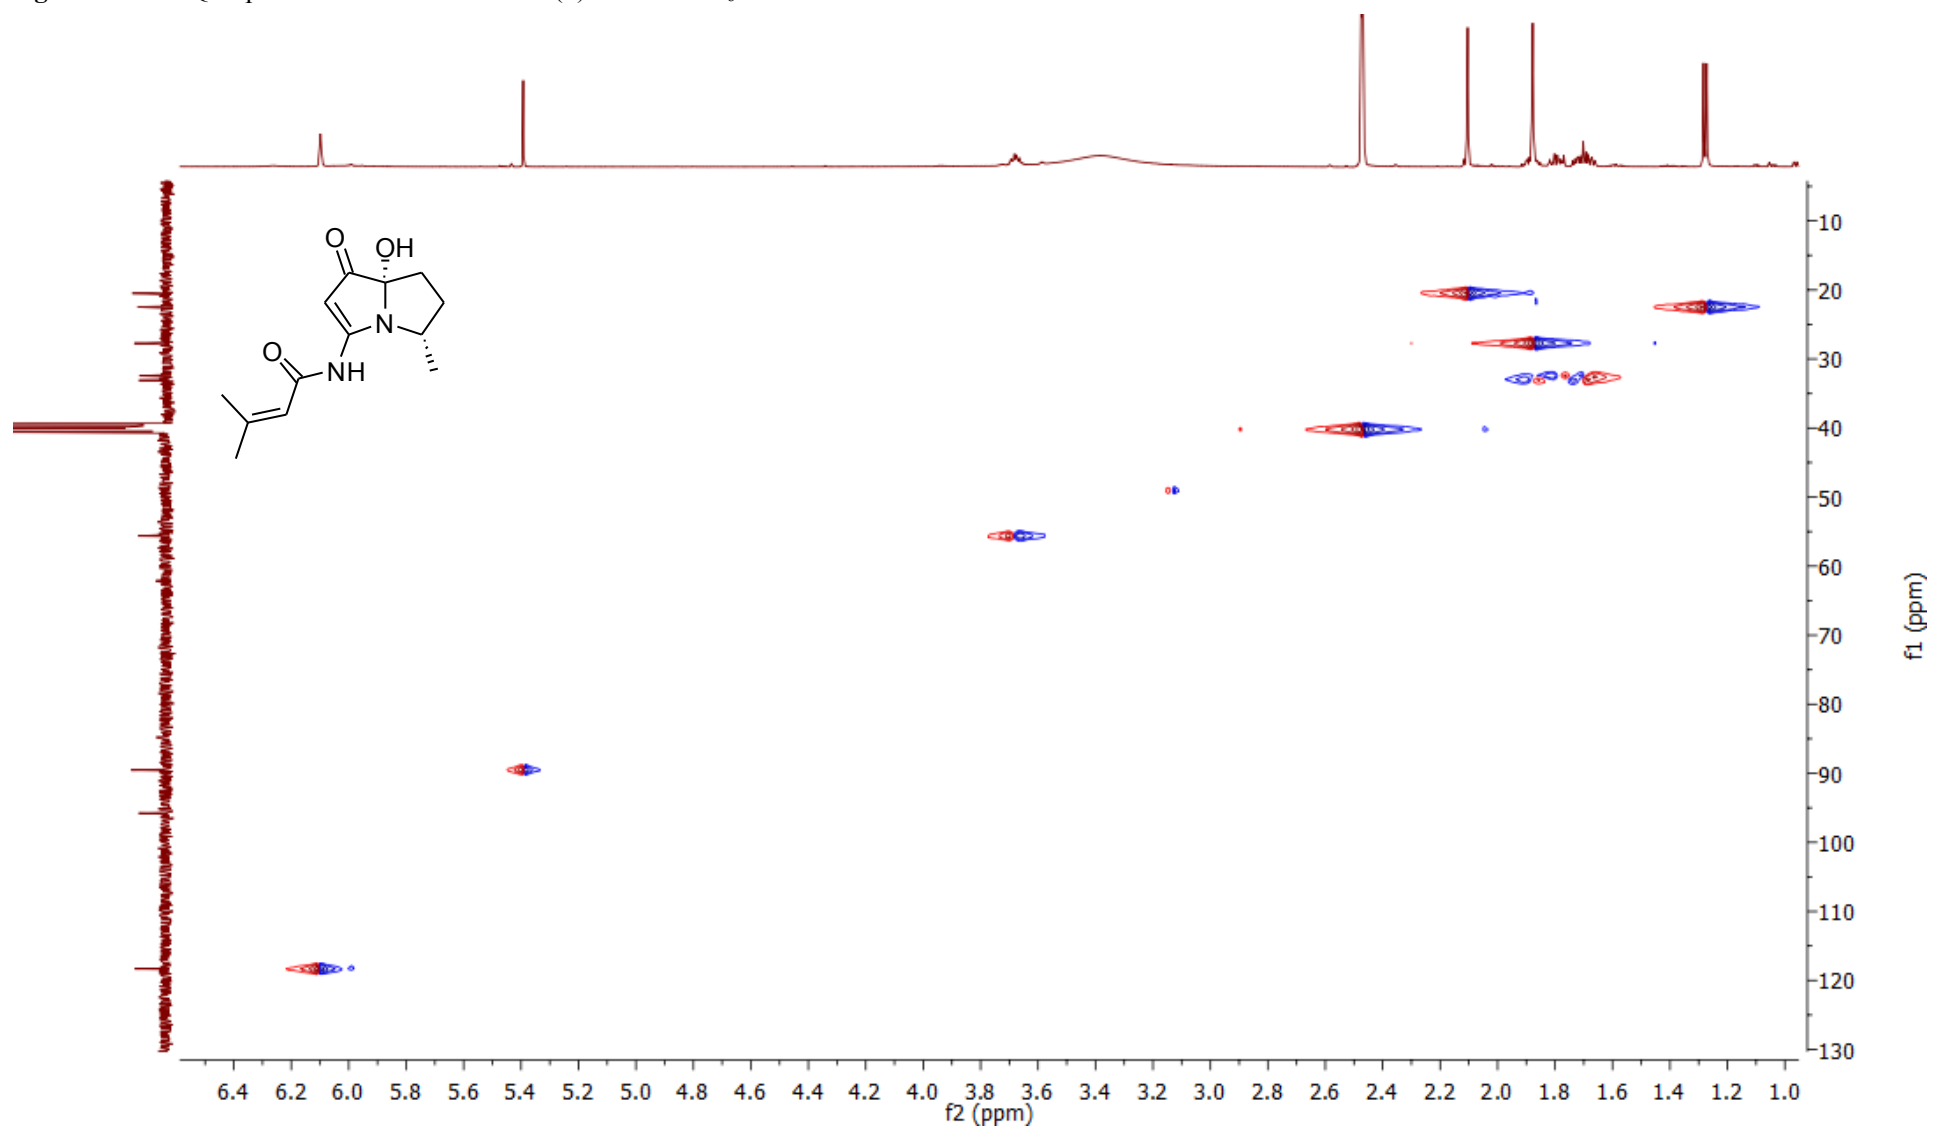

Figure S20.  $^1\text{H}$ - $^1\text{H}$  COSY spectrum of bohemamine D (**3**) in  $\text{DMSO-}d_6$

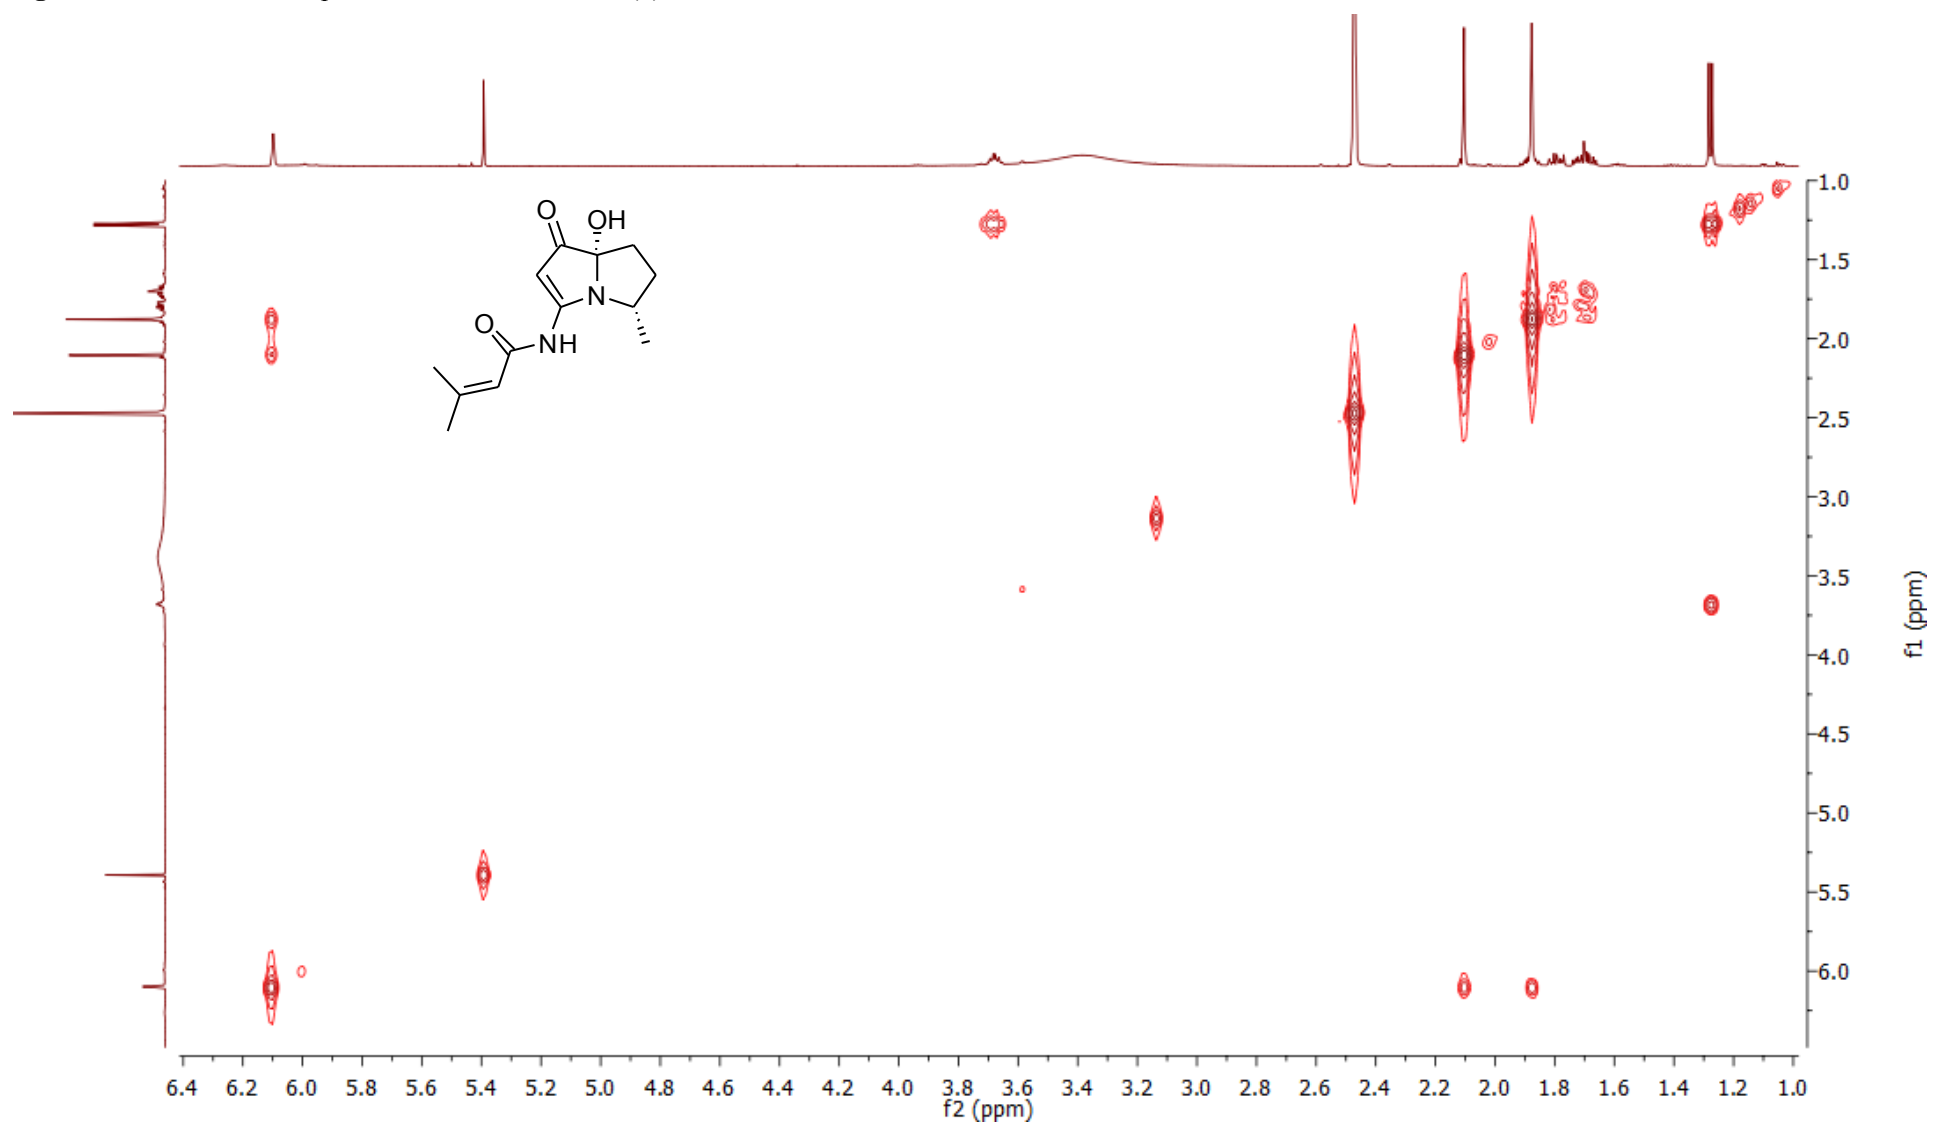

Figure S21. HMBC spectrum of bohemamine D (3) in DMSO- $d_6$

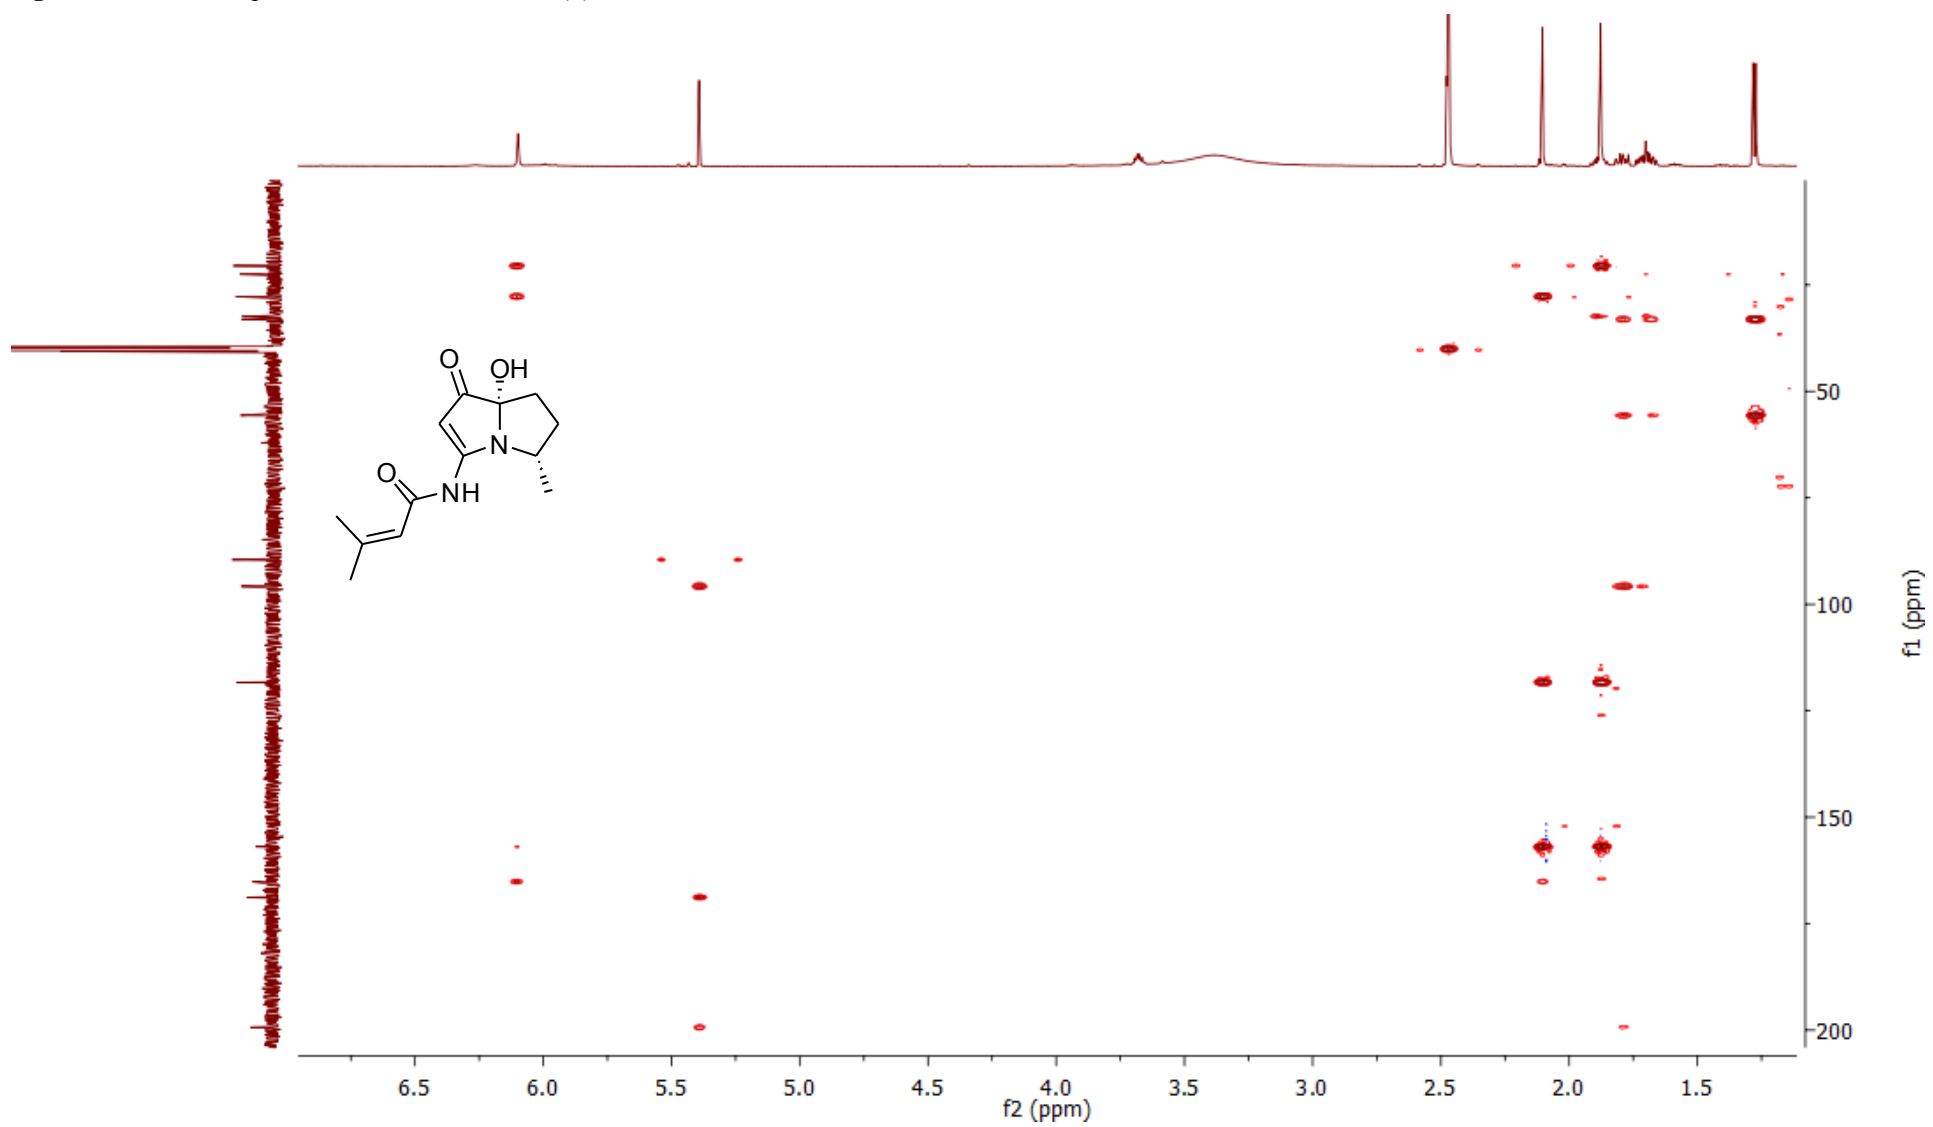



Figure S22. HRESIMS spectrum of compound 3a

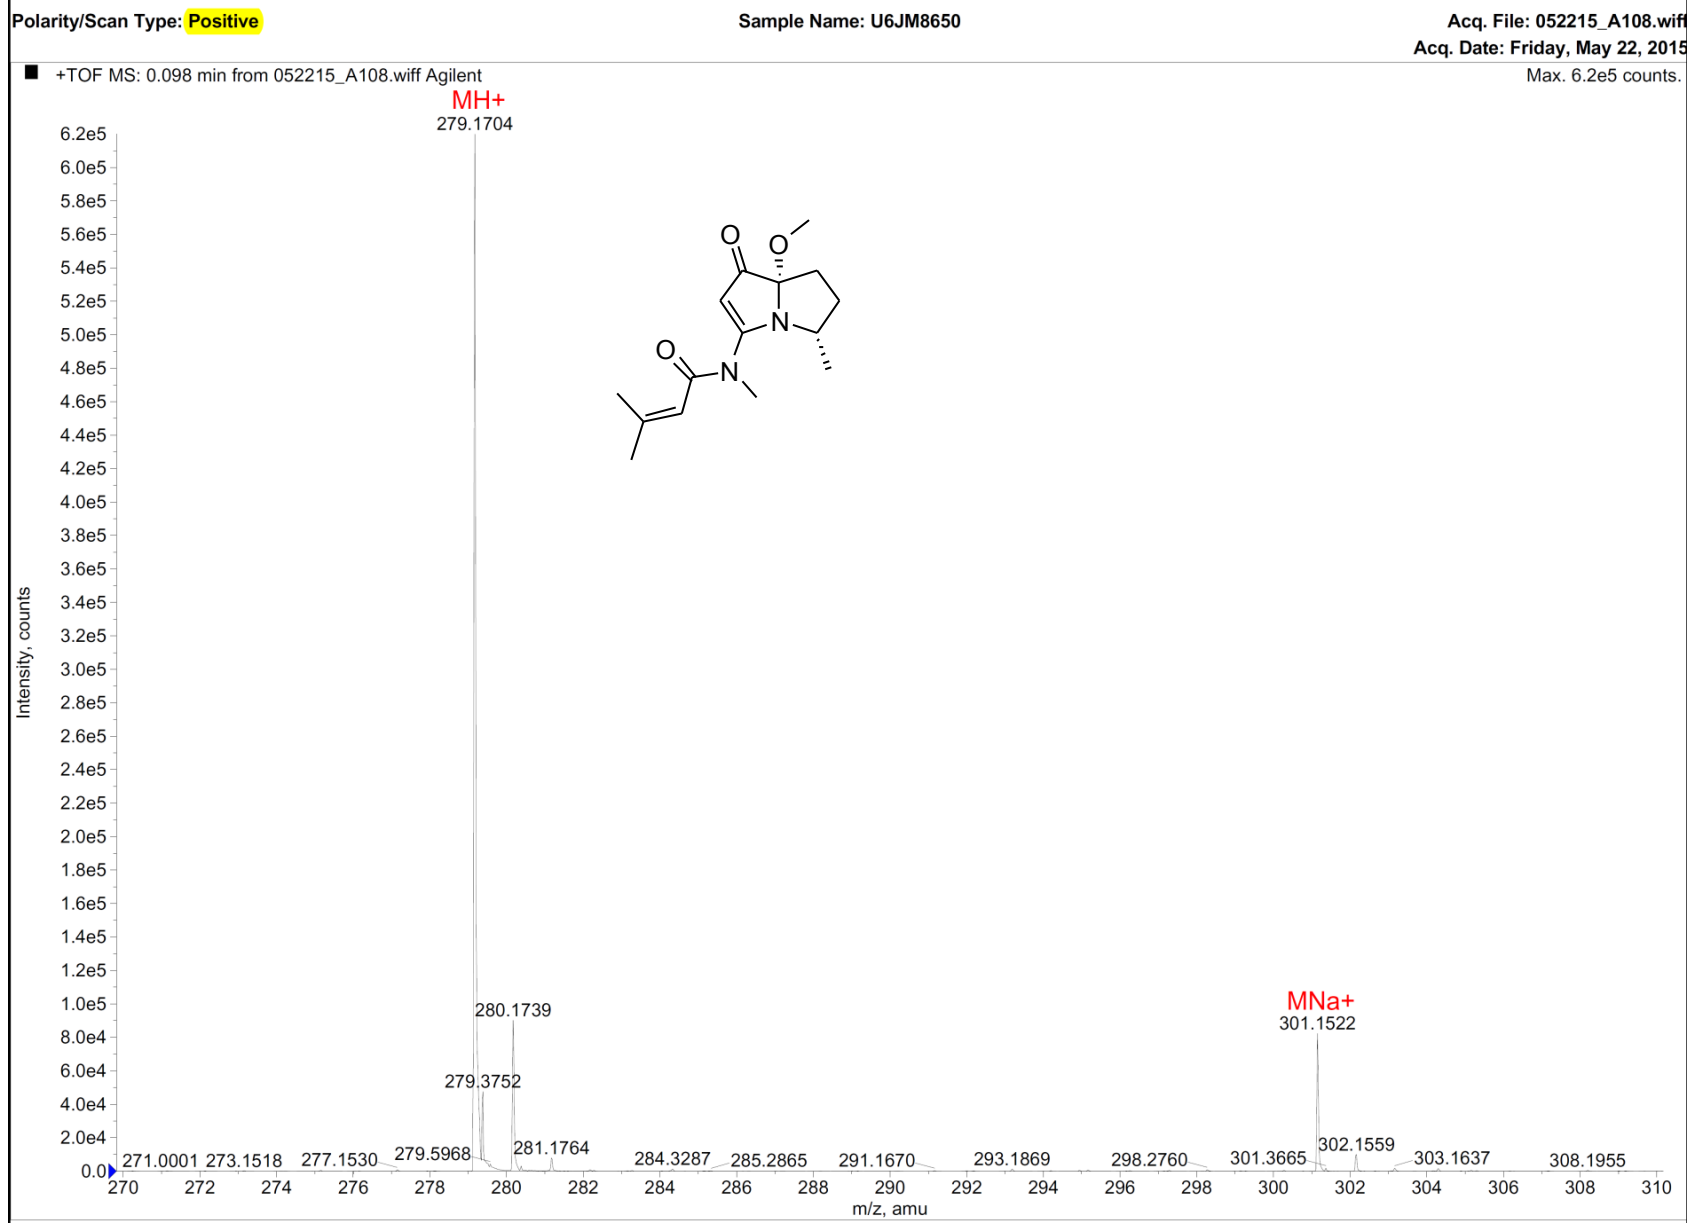

Figure S23. <sup>1</sup>H-NMR spectrum of compound **3a** in CDCl<sub>3</sub>

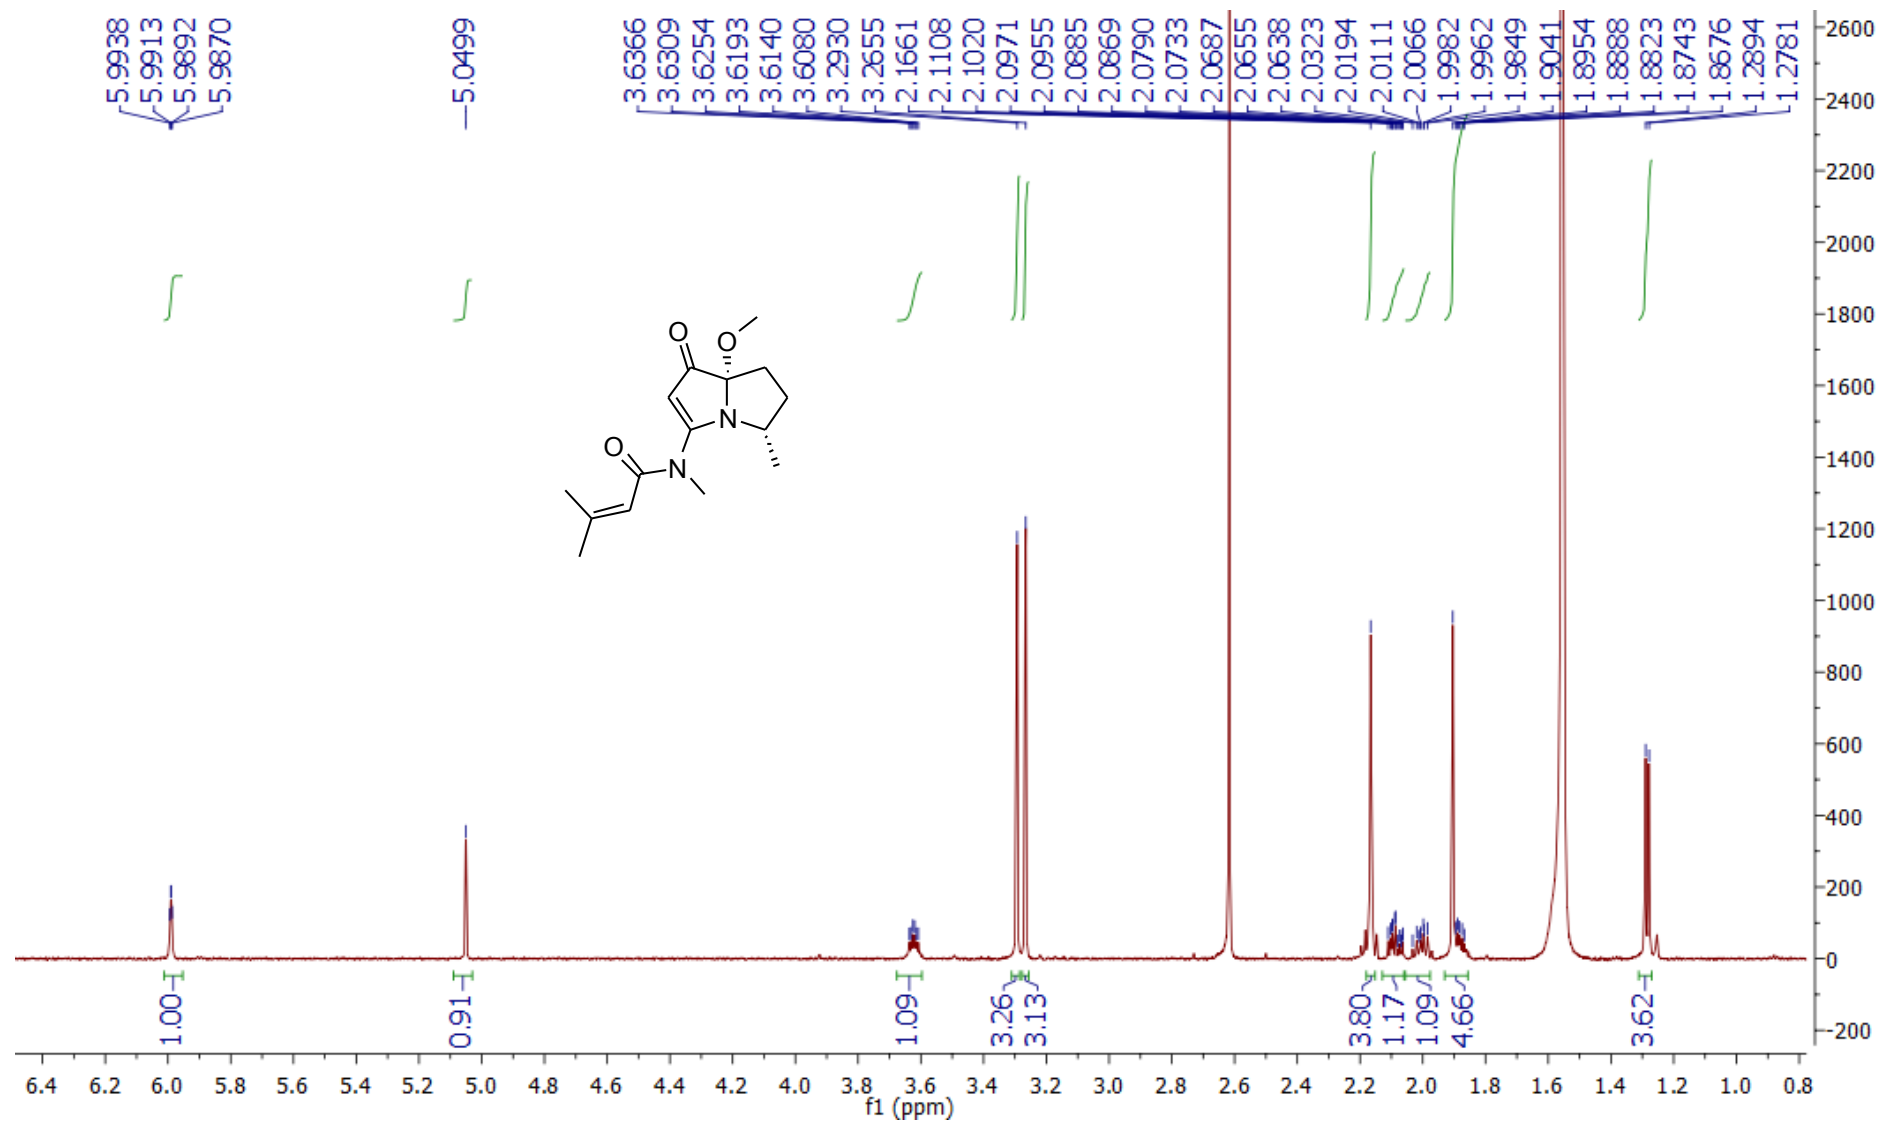

Figure S24. HSQC spectrum of compound **3a** in CDCl<sub>3</sub>

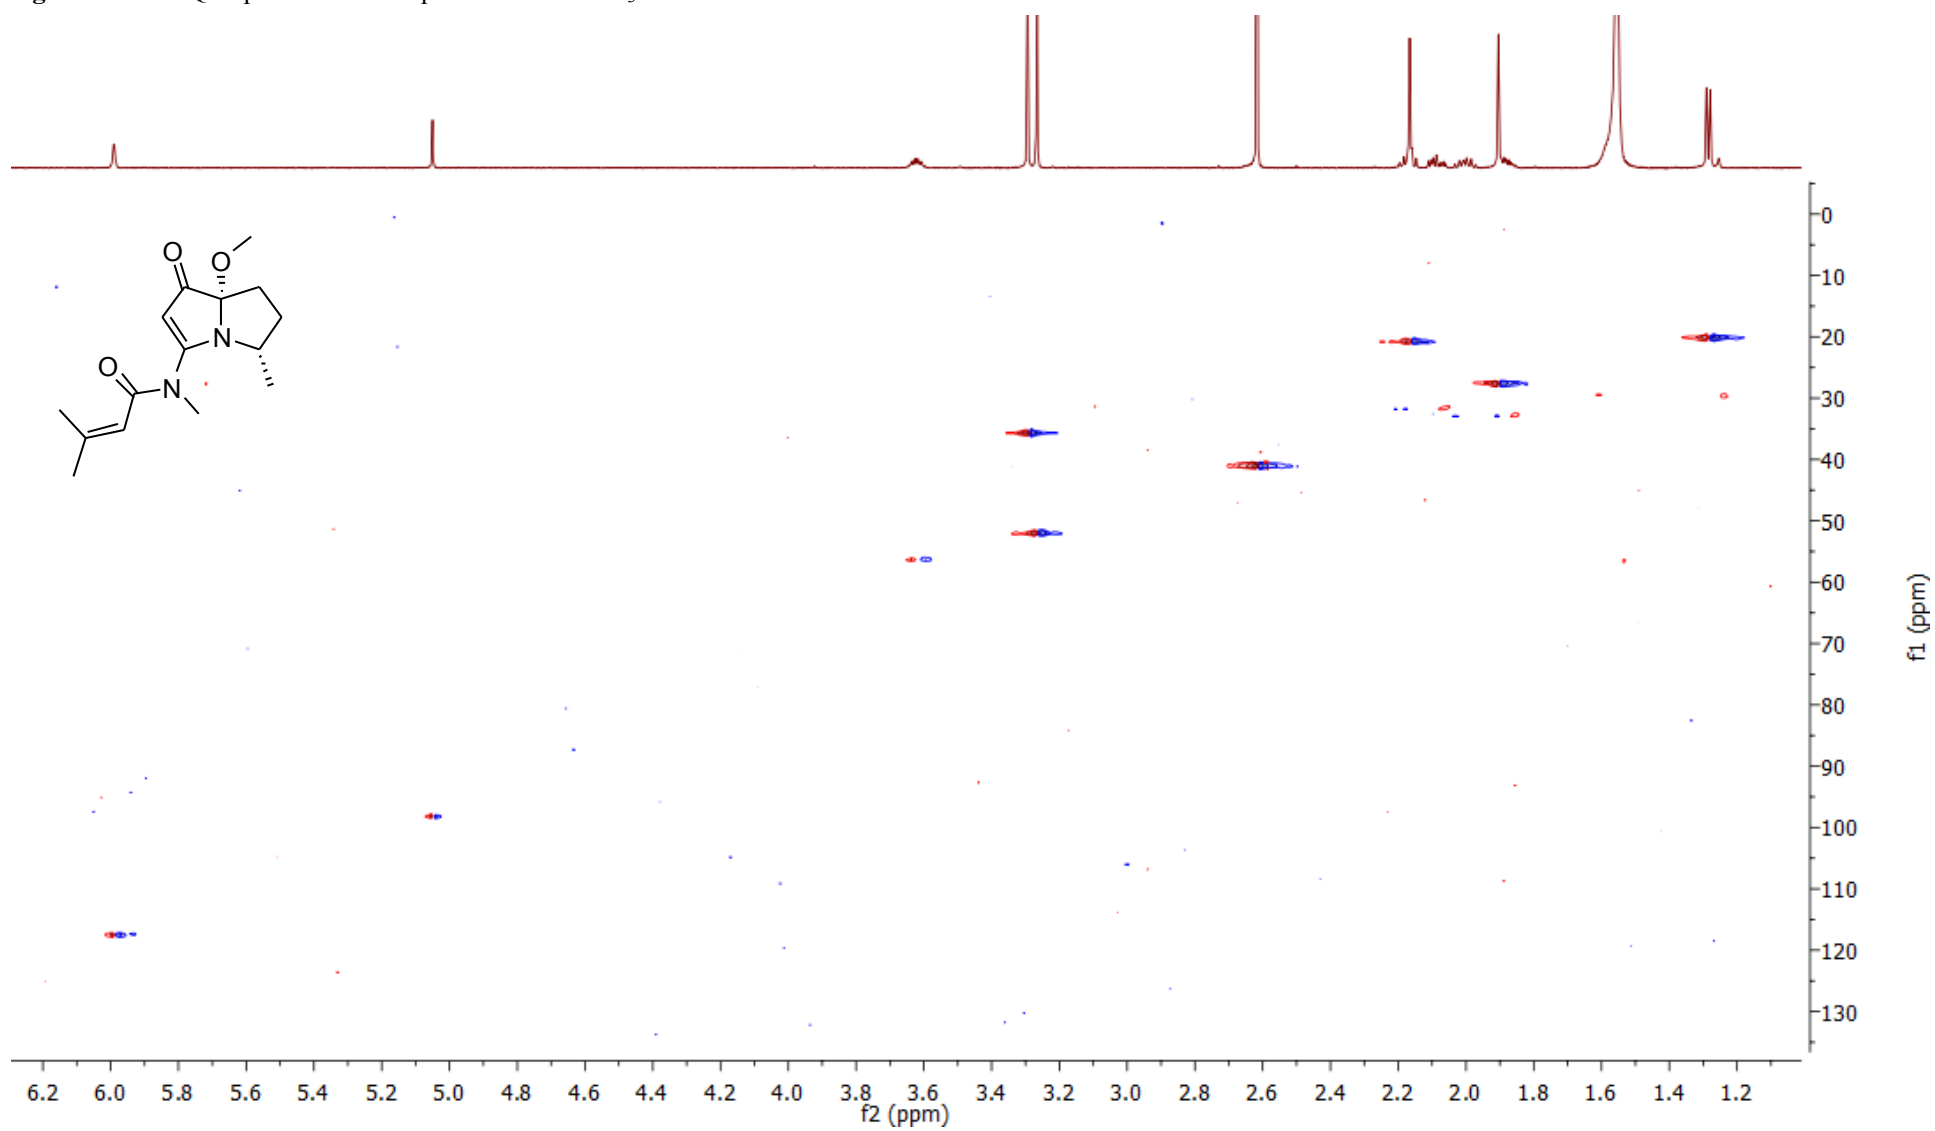

Figure S25. HMBC spectrum of compound **3a** in CDCl<sub>3</sub>

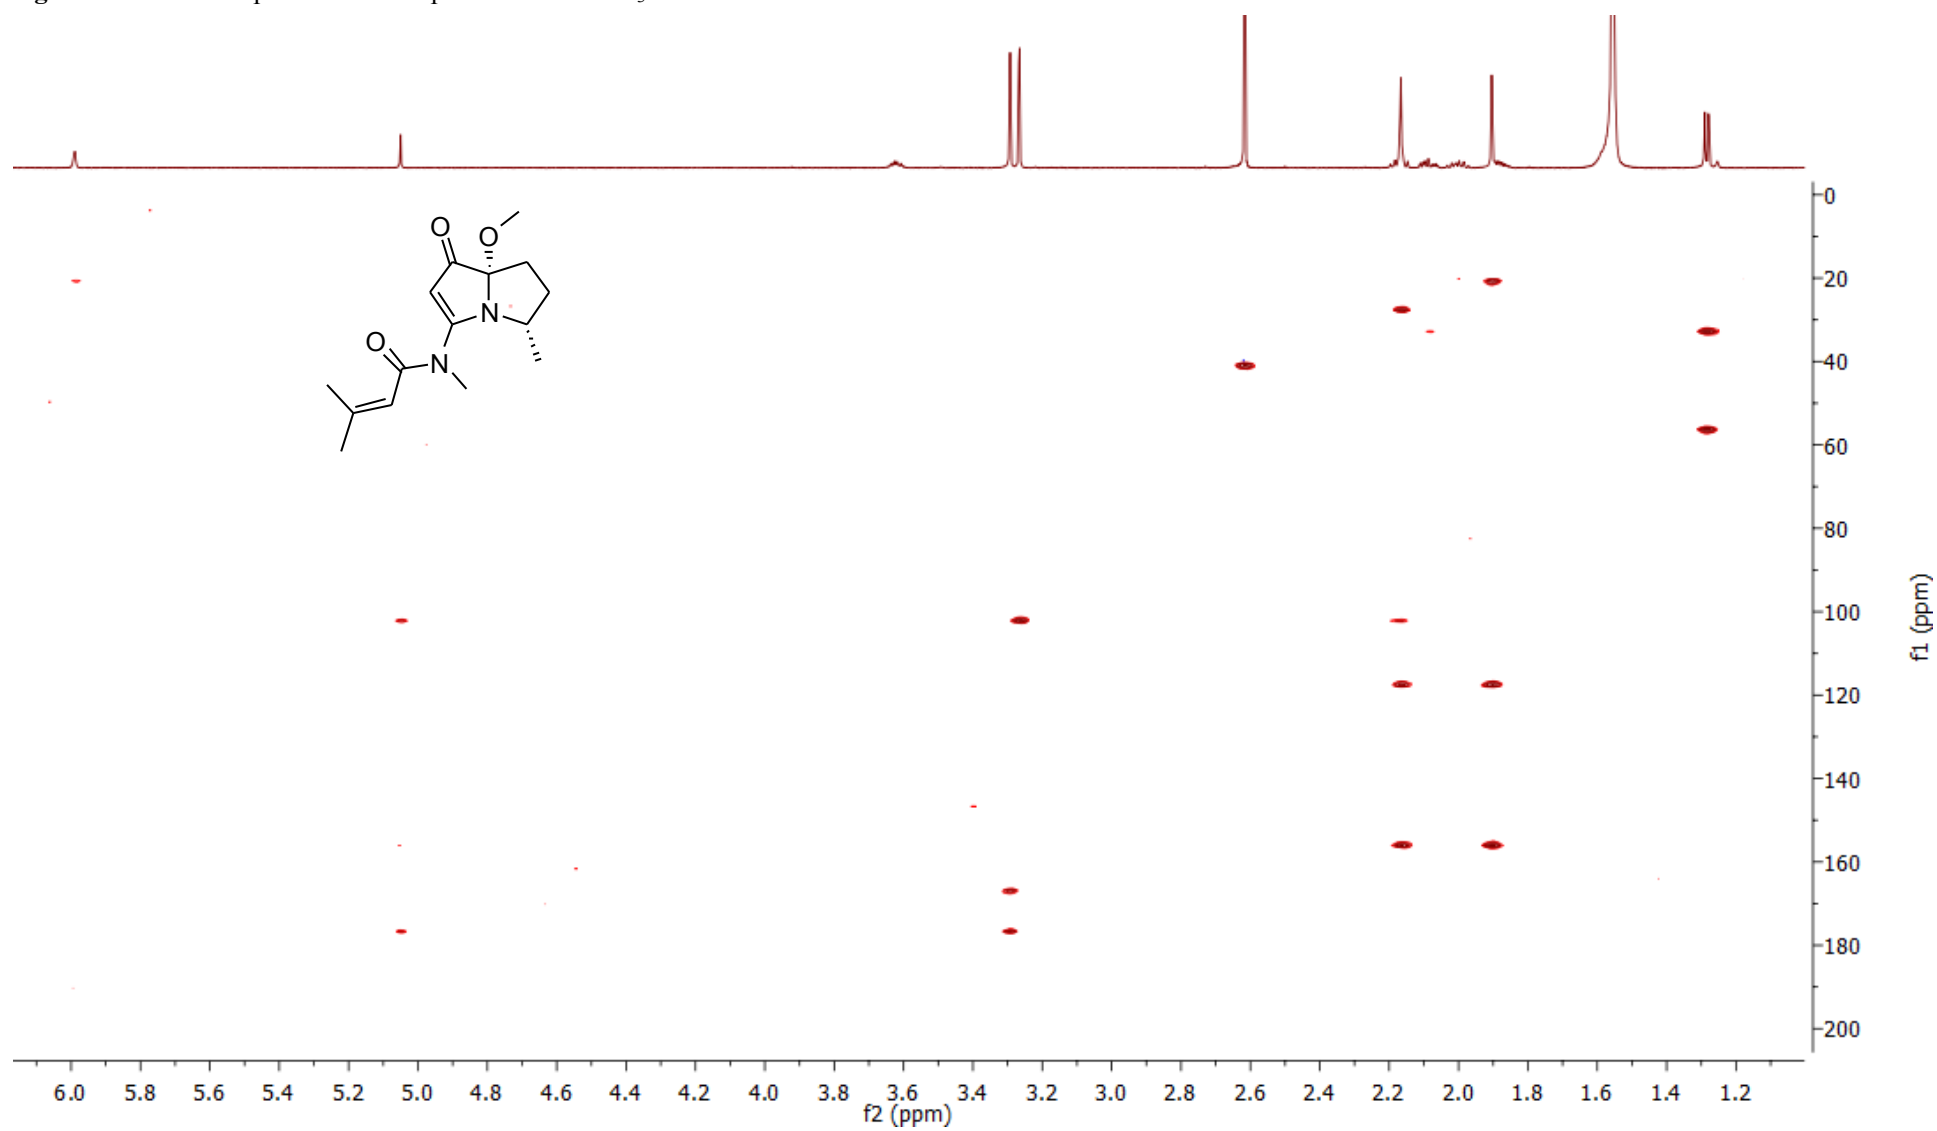

Figure S26. NOESY spectrum of compound **3a** in CDCl<sub>3</sub>

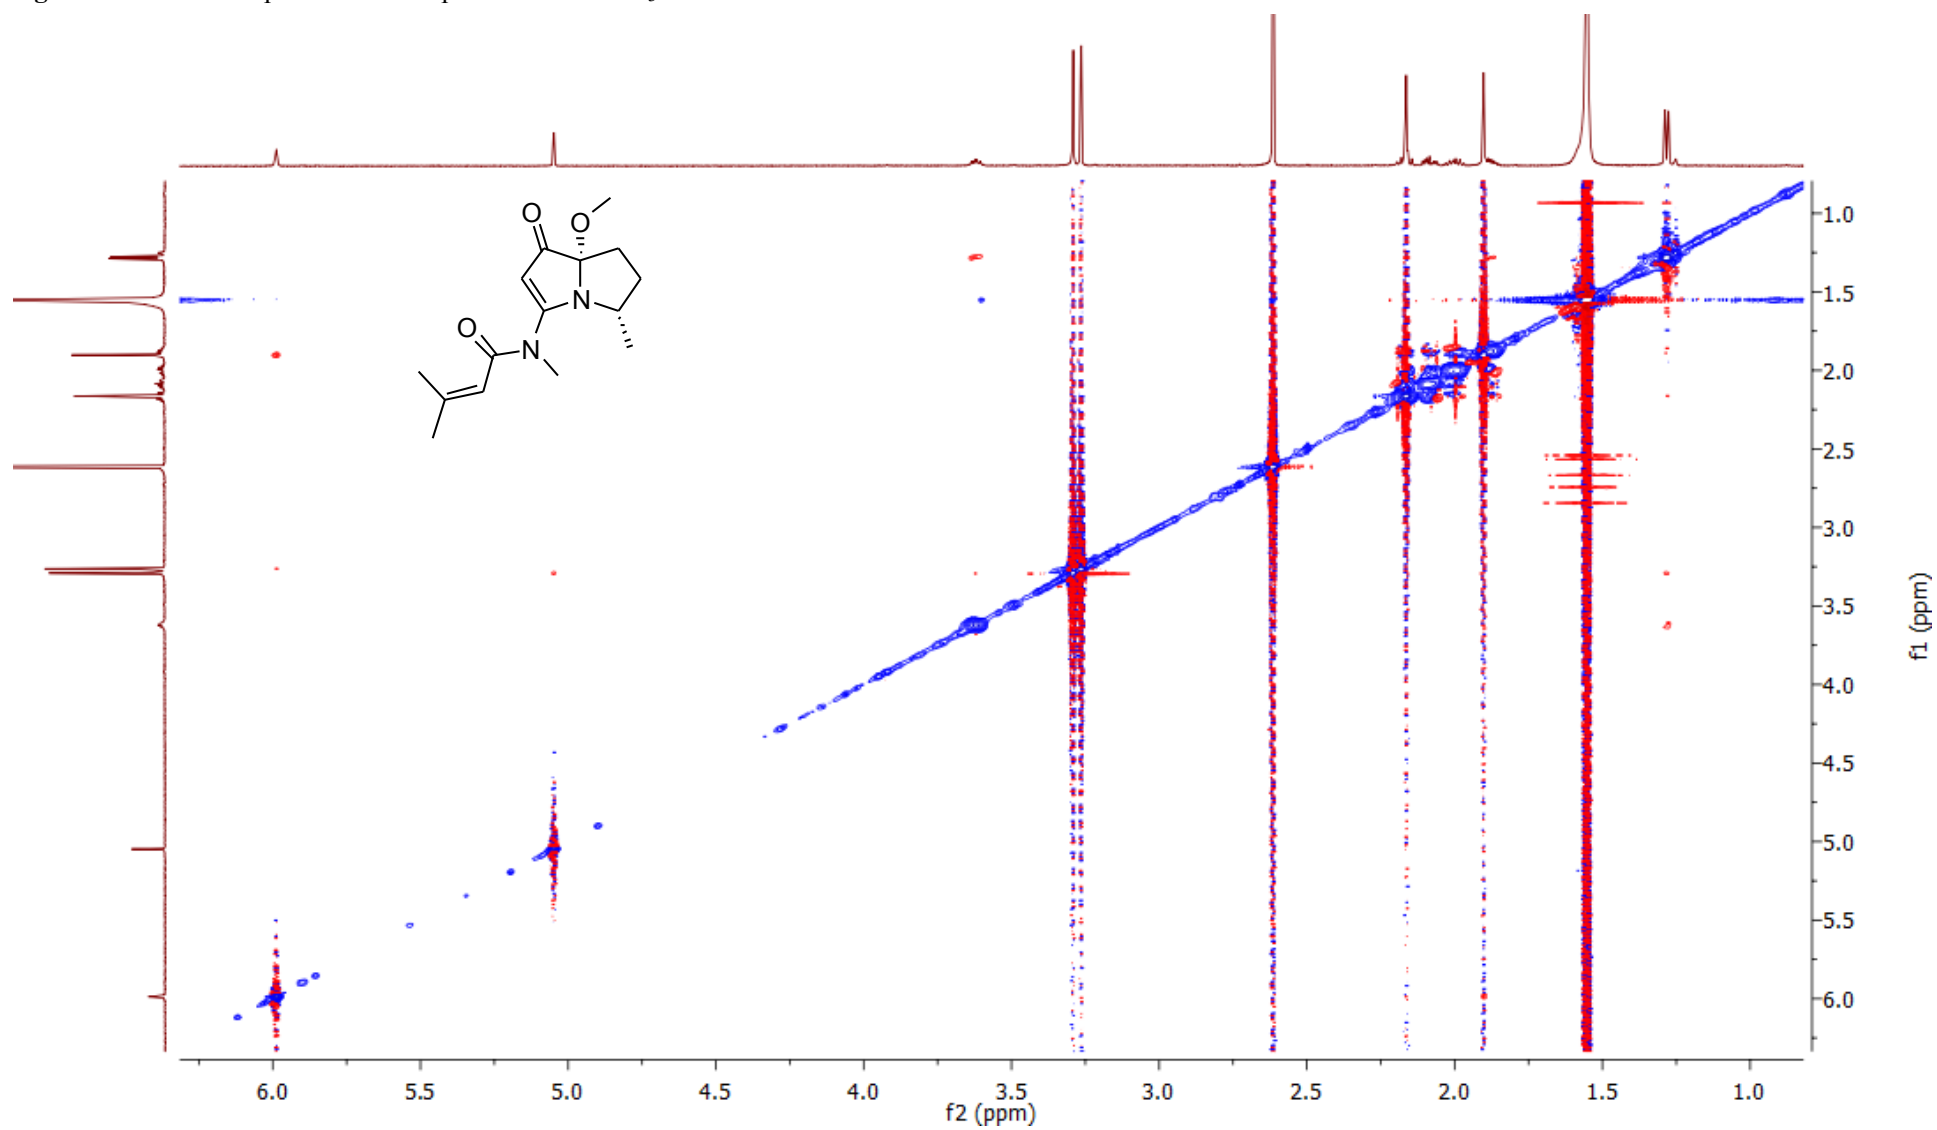

Figure S27. HRESIMS spectrum of bohemamine E (4)

Polarity/Scan Type: **Positive**

Sample Name: U6JM8175

Acq. File: 040215008.wiff  
Acq. Date: Thursday, April 02, 20

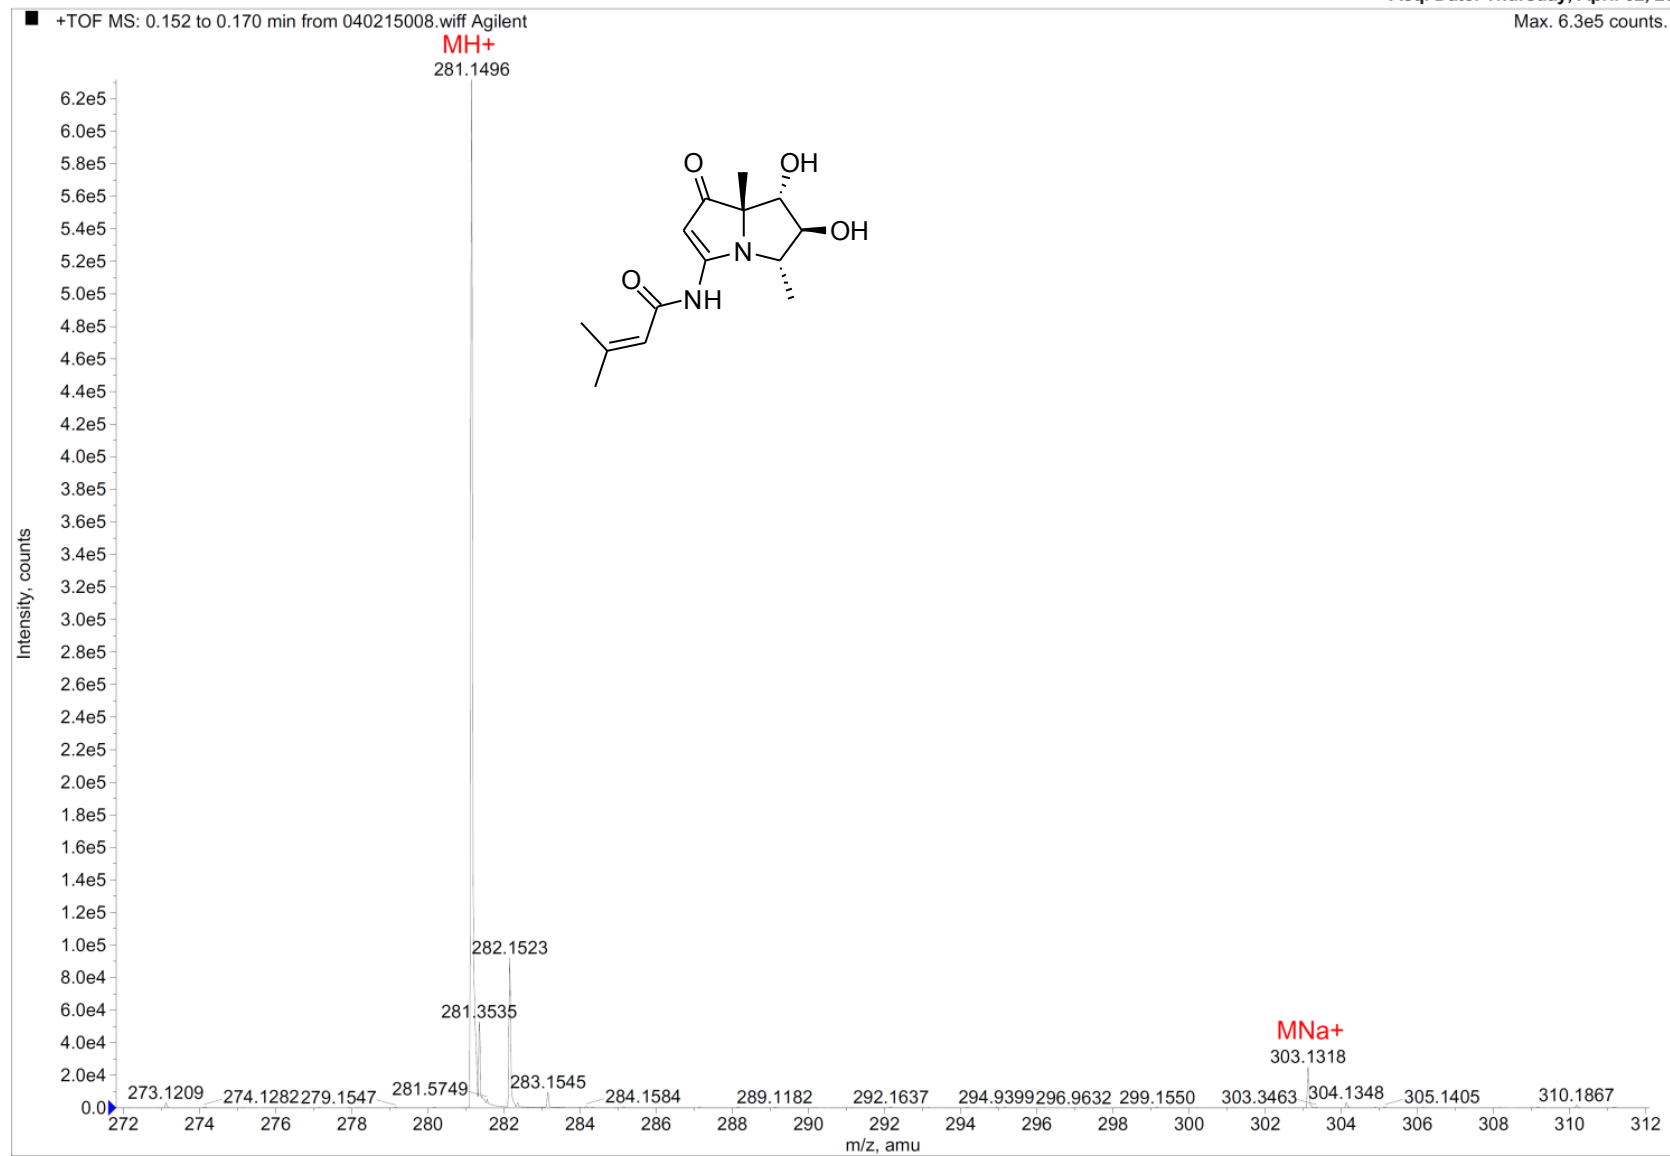

Figure S28. <sup>1</sup>H-NMR spectrum of bohemamine E (4) in DMSO-*d*<sub>6</sub>

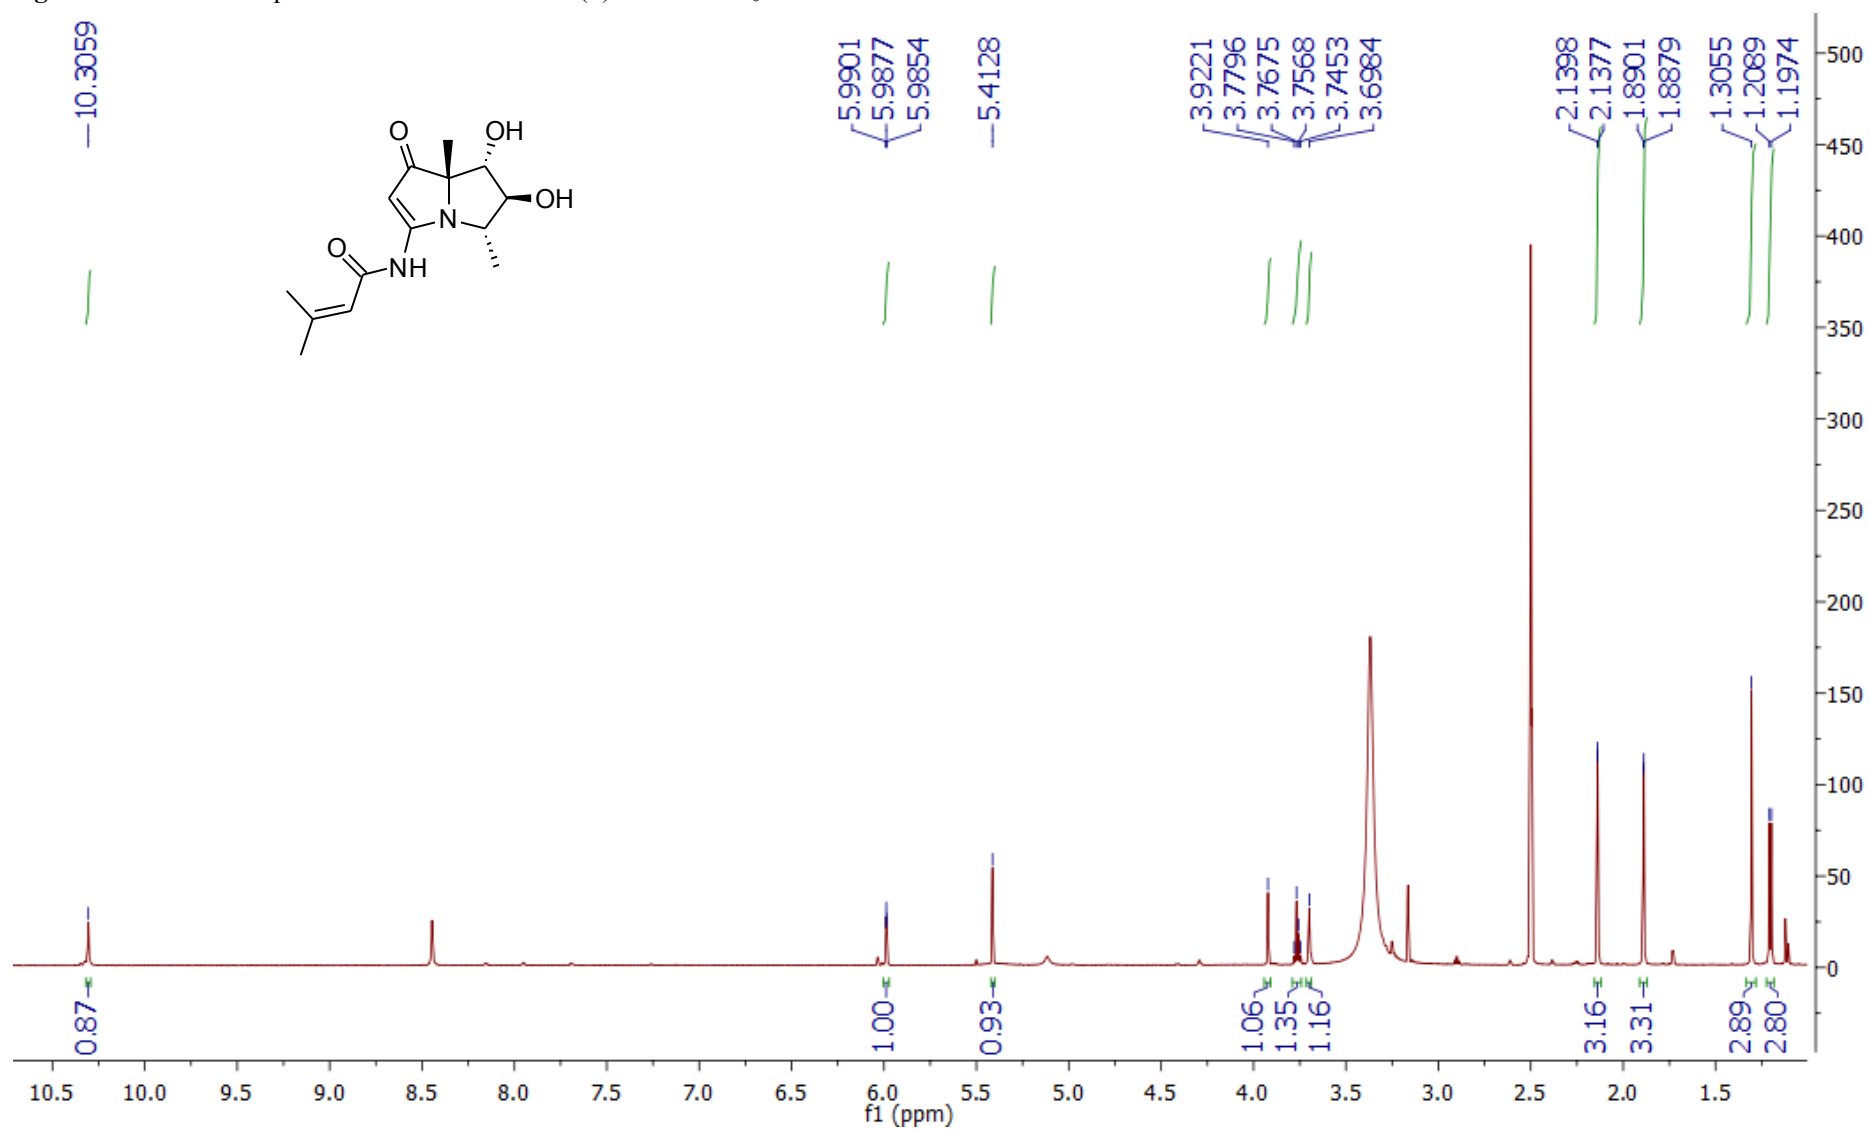

Figure S29.  $^{13}\text{C}$ -NMR spectrum of bohemamine E (**4**) in  $\text{DMSO-}d_6$

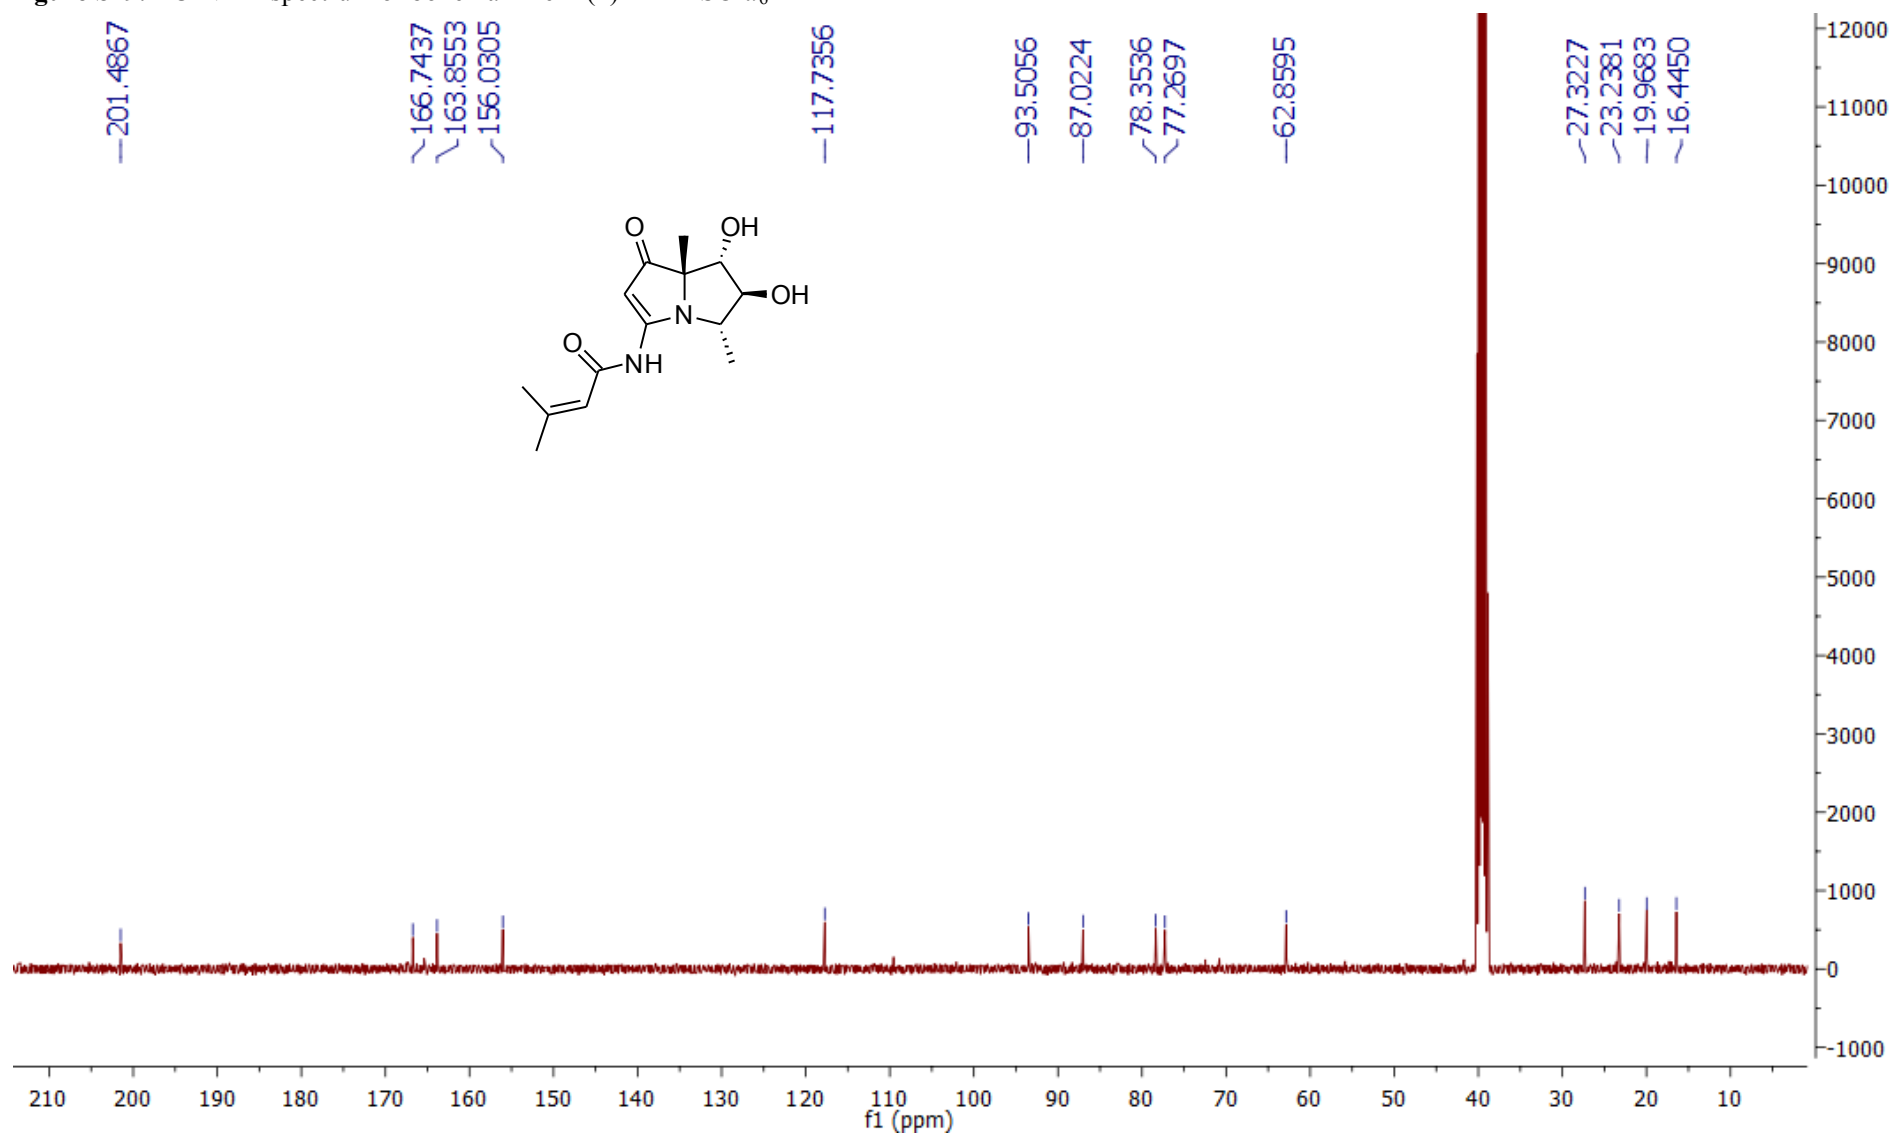



Figure S30.  $^1\text{H}$ - $^1\text{H}$  COSY spectrum of bohemamine E (**4**) in  $\text{DMSO-}d_6$

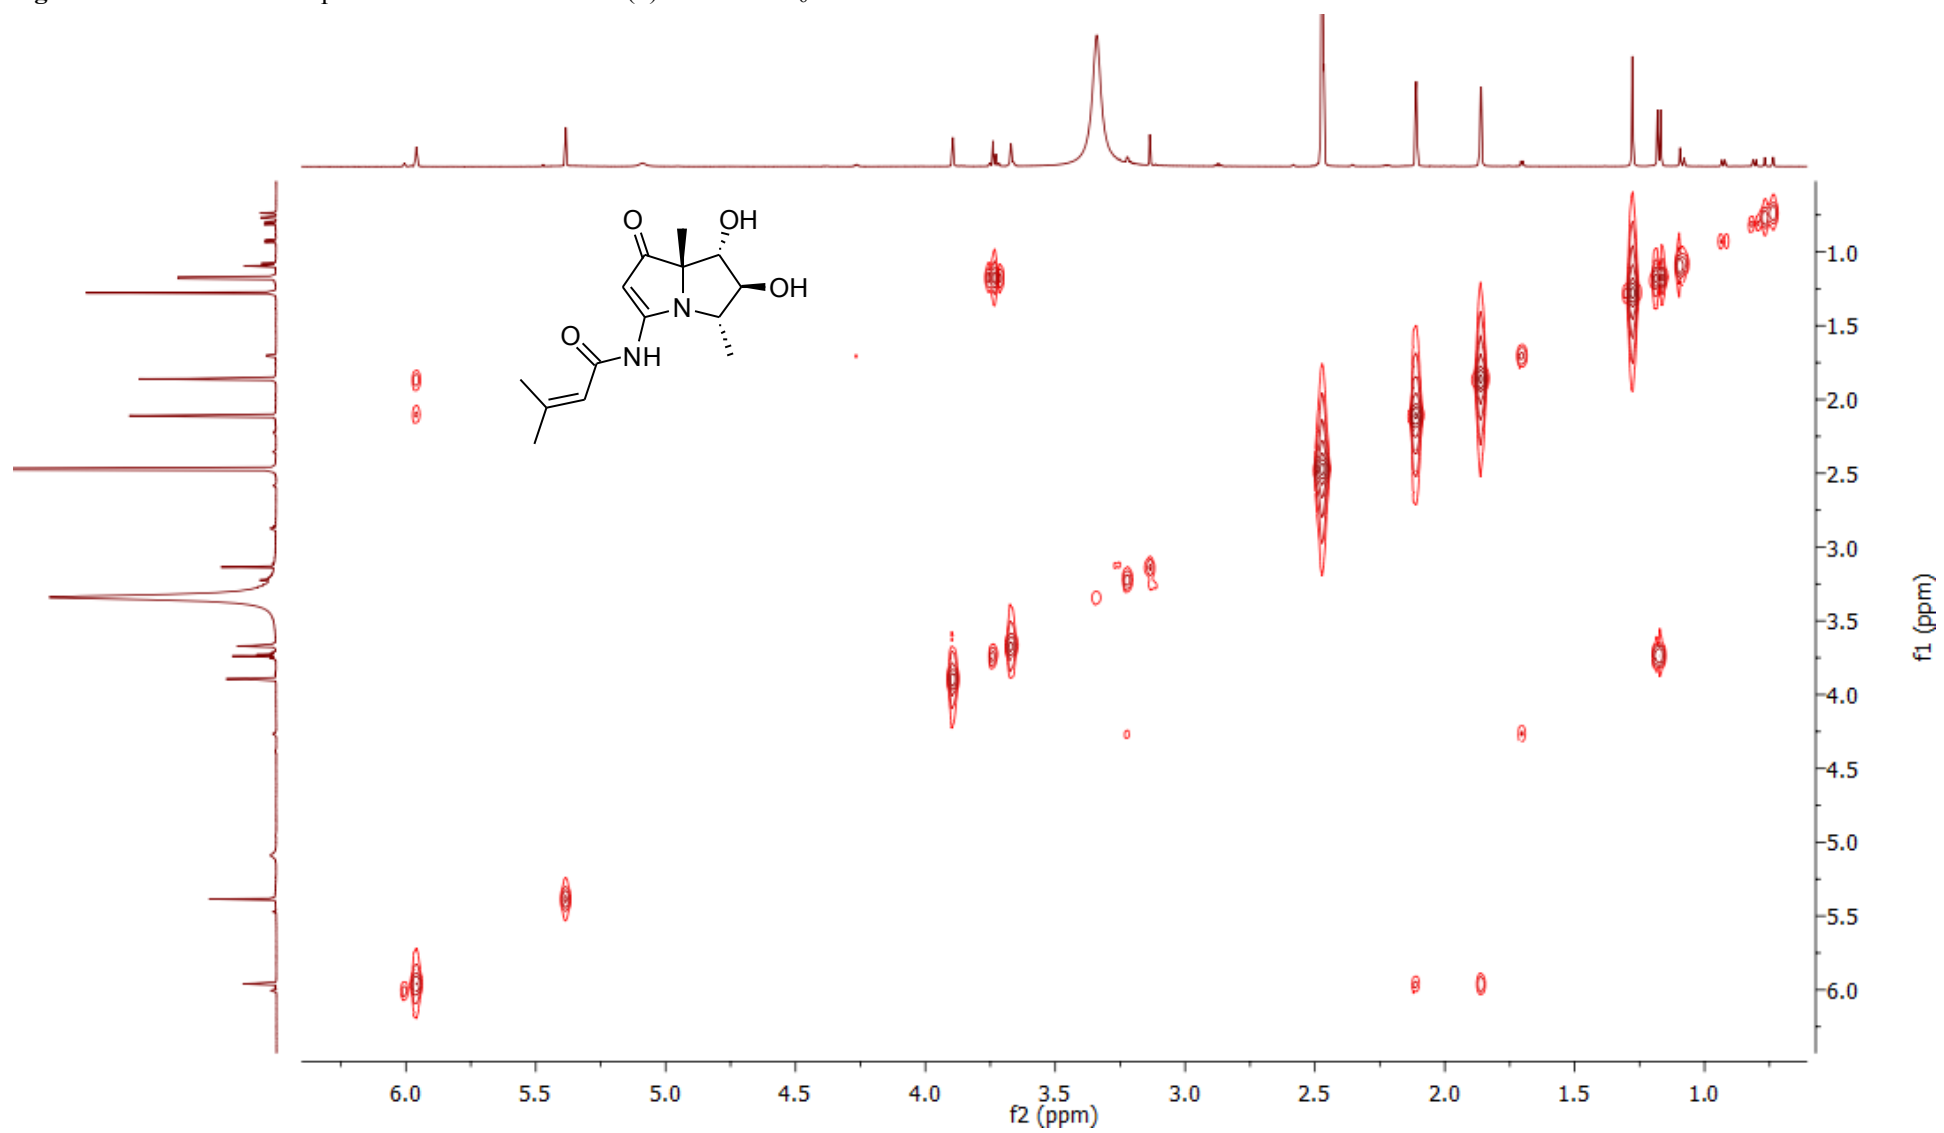

Figure S31. HSQC spectrum of bohemamine E (4) in DMSO- $d_6$

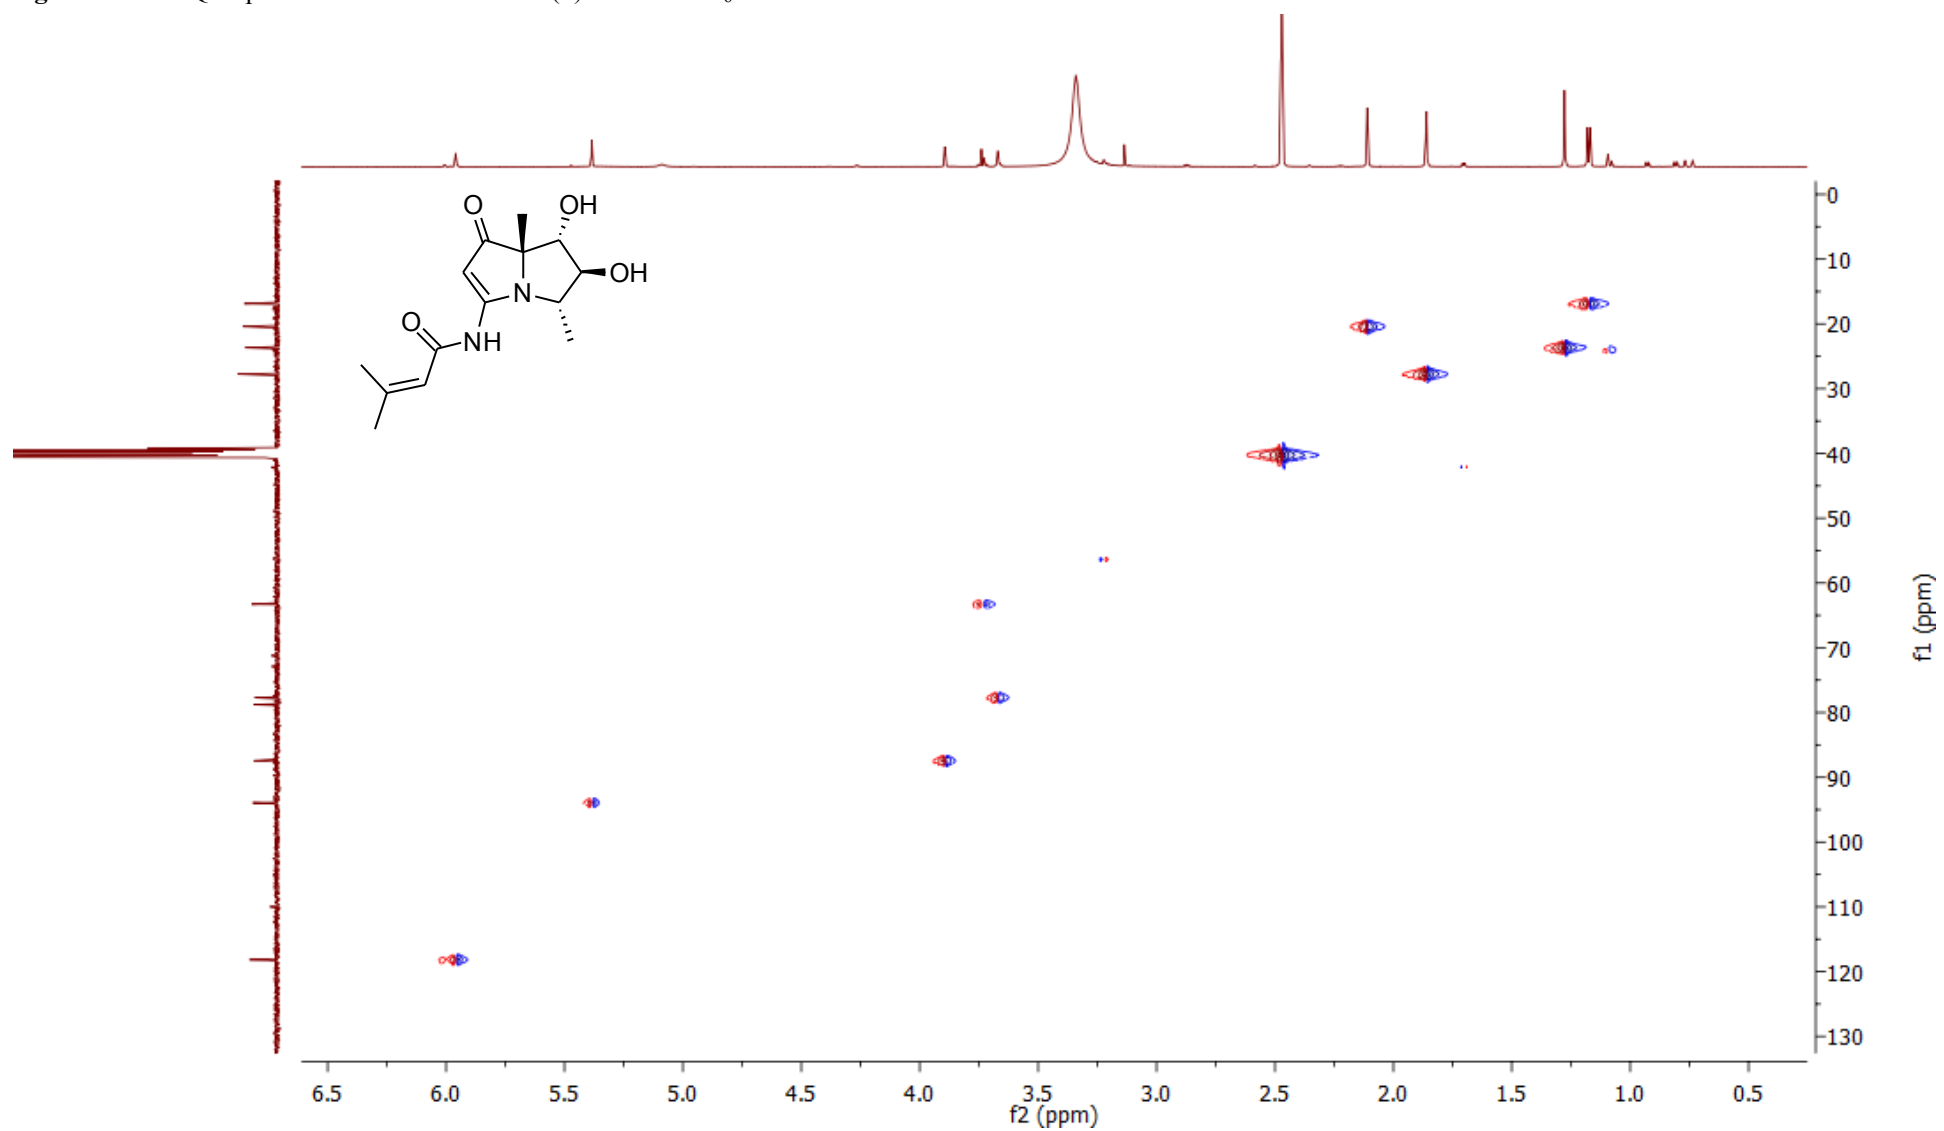

Figure S32. HMBC spectrum of bohemamine E (4) in DMSO- $d_6$

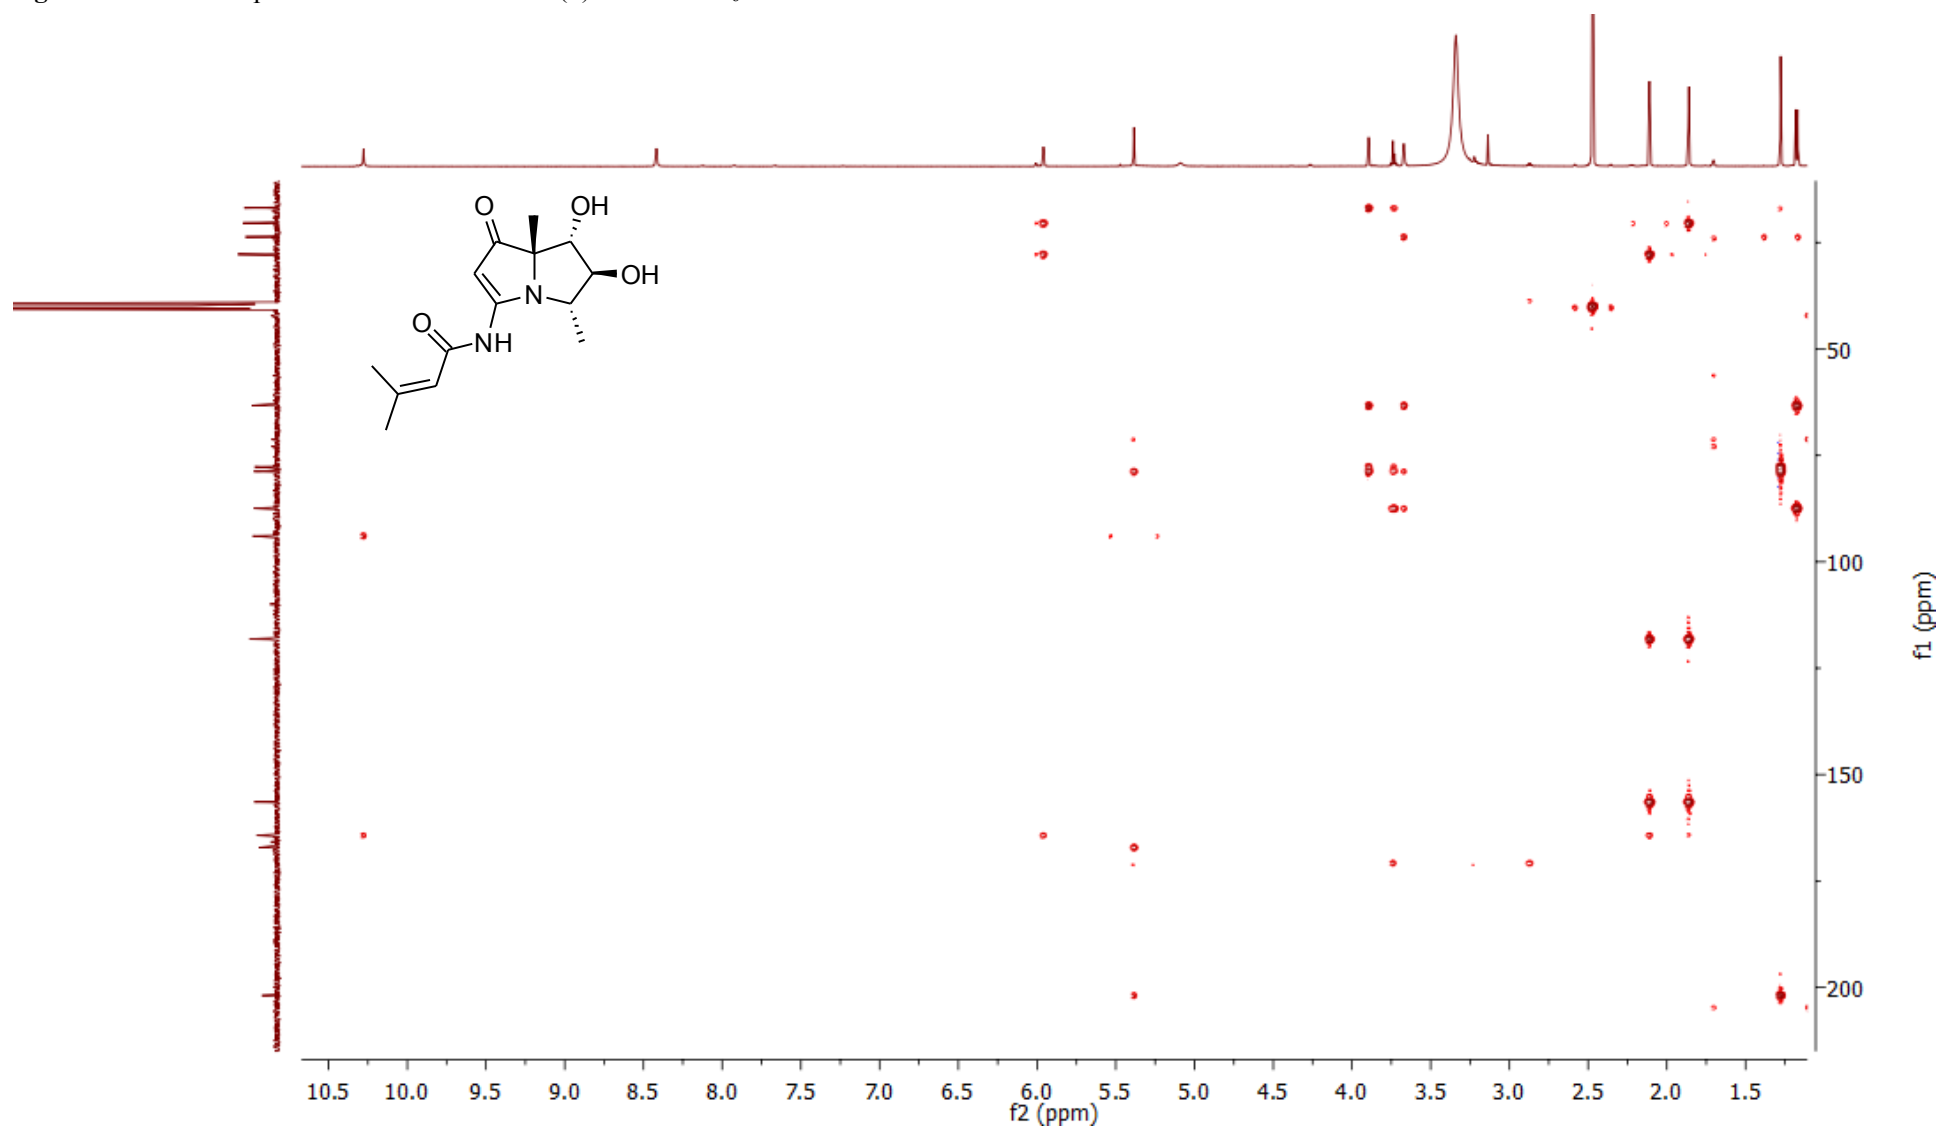

Figure S33. NOESY spectrum of bohemamine E (4) in DMSO-*d*<sub>6</sub>

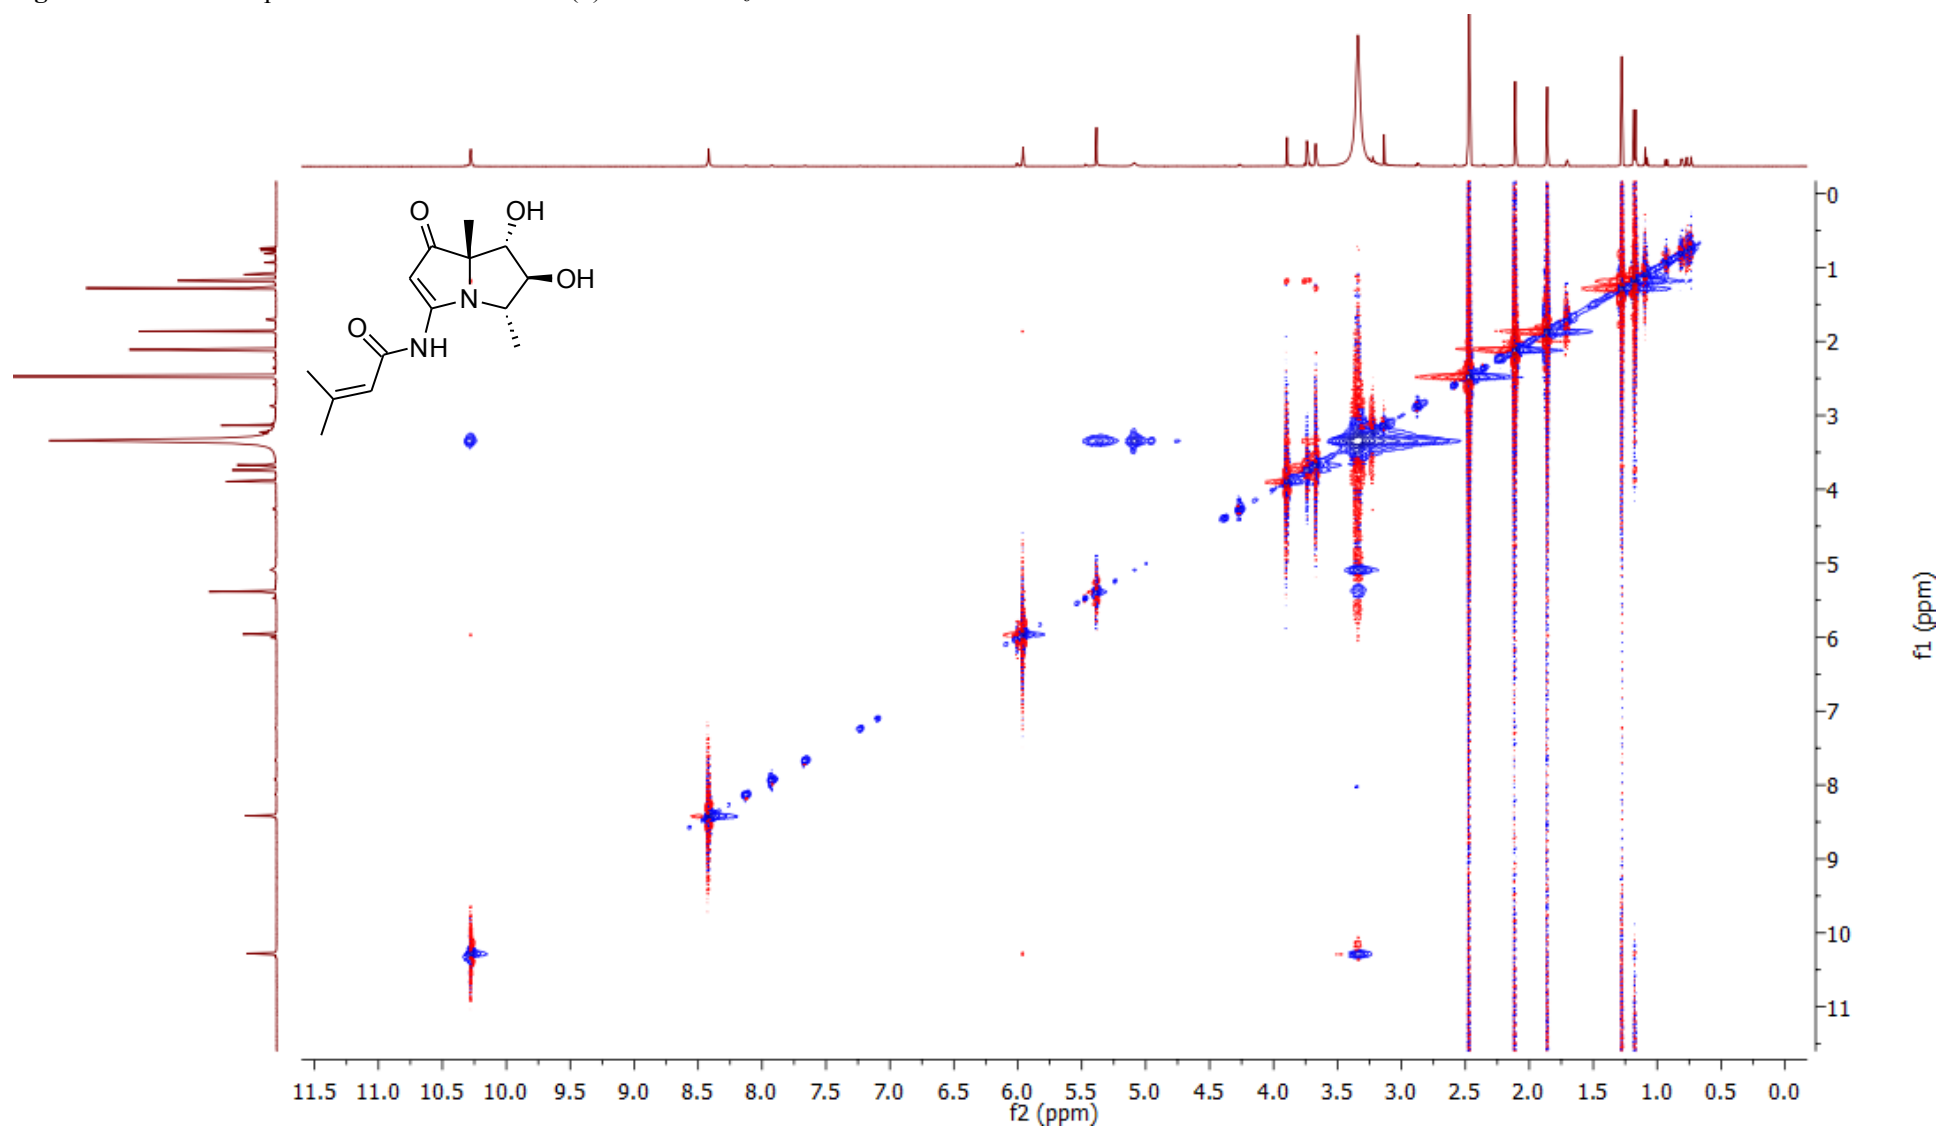

Figure S34. HRESIMS spectrum of bohemamine F (5)

Polarity/Scan Type: **Positive**

Sample Name: U6JM8179

Acq. File: 040215012.wif  
Acq. Date: Thursday, April 02, 21

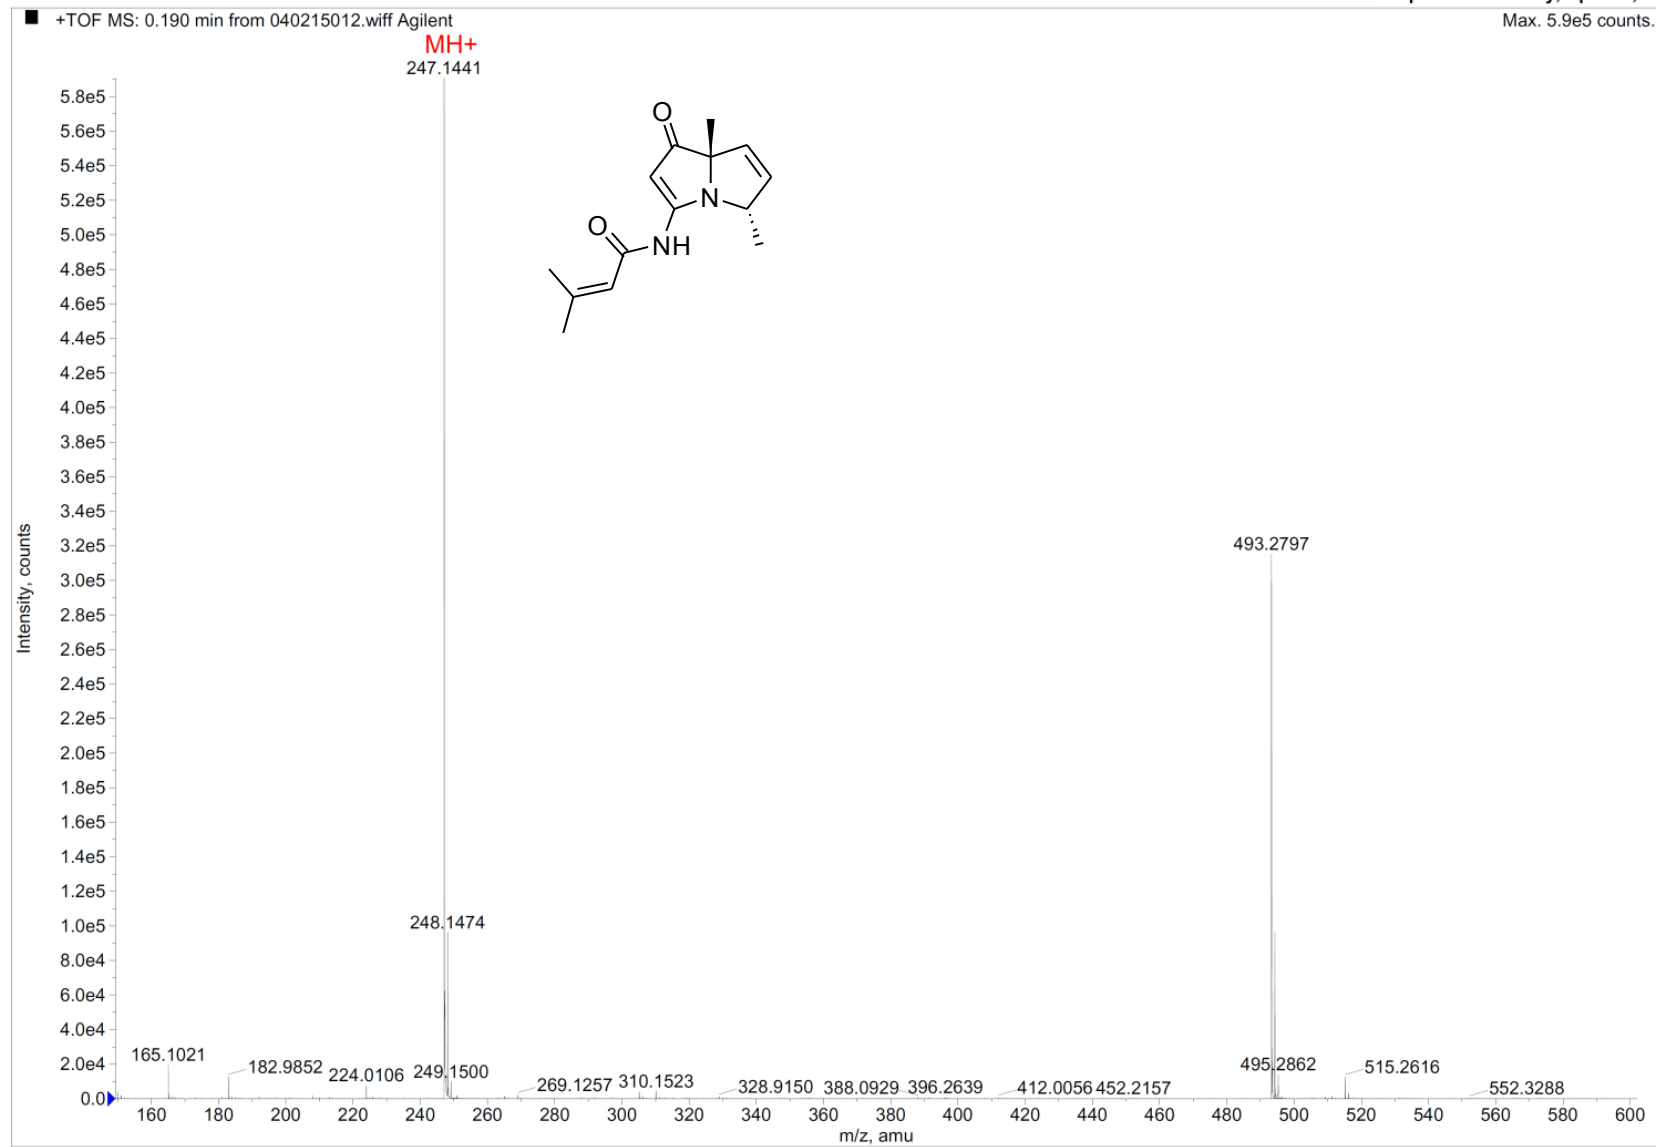

Figure S35. <sup>1</sup>H-NMR spectrum of bohemamine F (5) in DMSO-*d*<sub>6</sub>

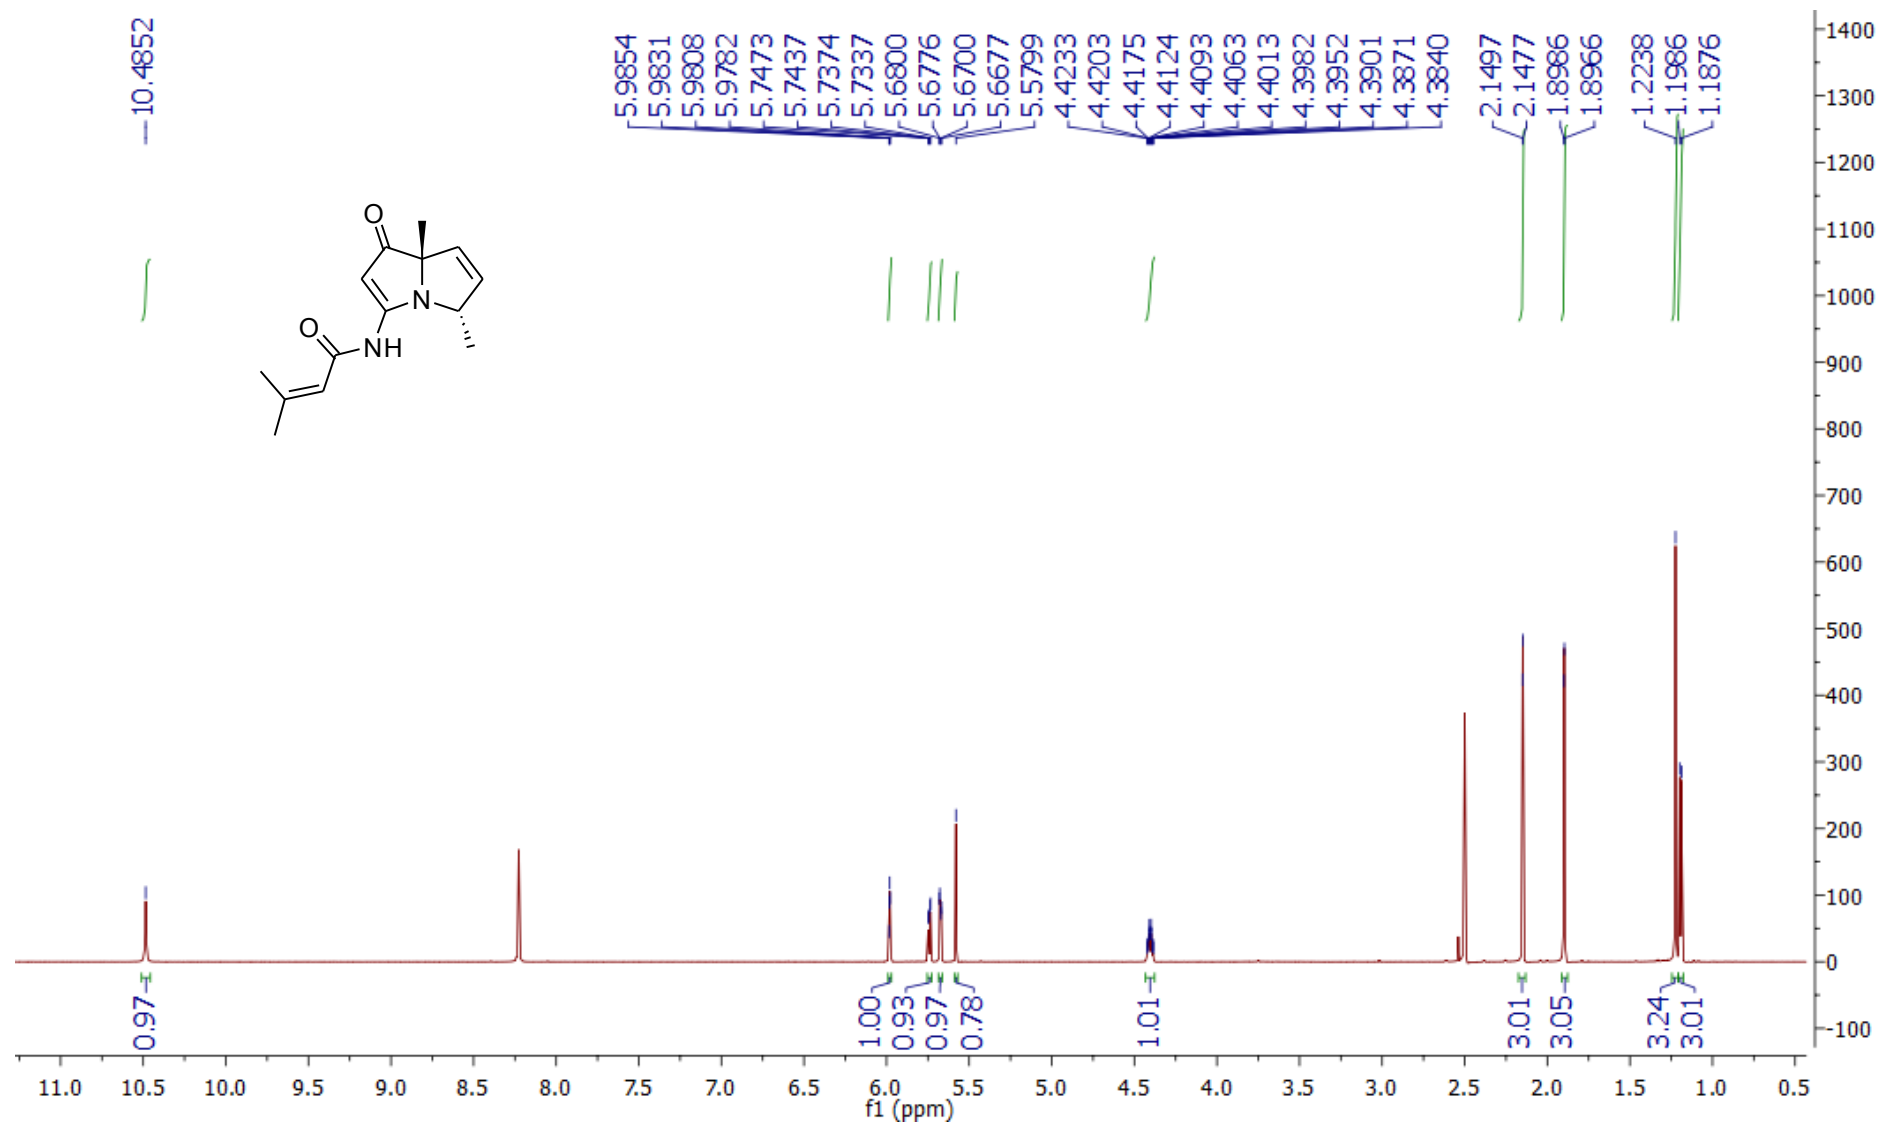

Figure S36.  $^{13}\text{C}$ -NMR spectrum of bohemamine F (**5**) in  $\text{DMSO-}d_6$

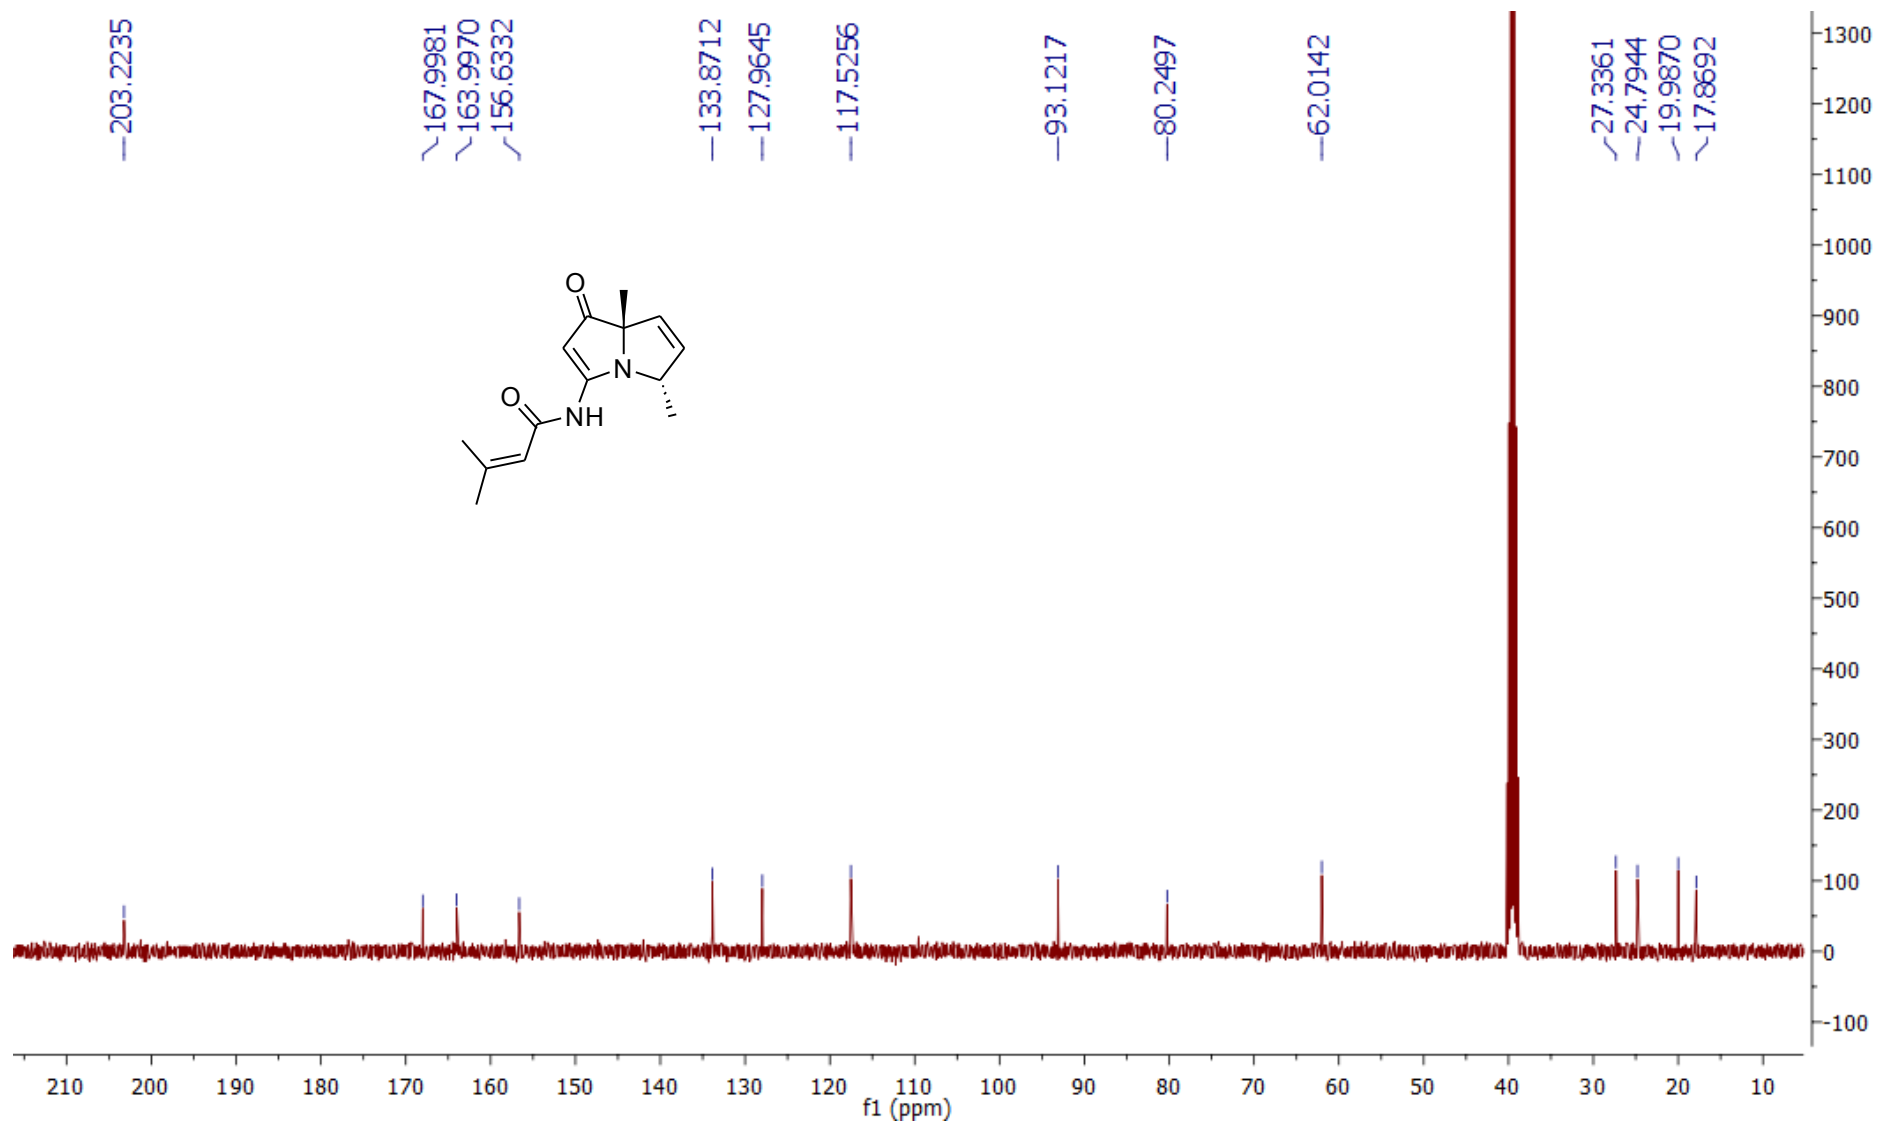

Figure S37.  $^1\text{H}$ - $^1\text{H}$  COSY spectrum of bohemamine F (5) in  $\text{DMSO-}d_6$

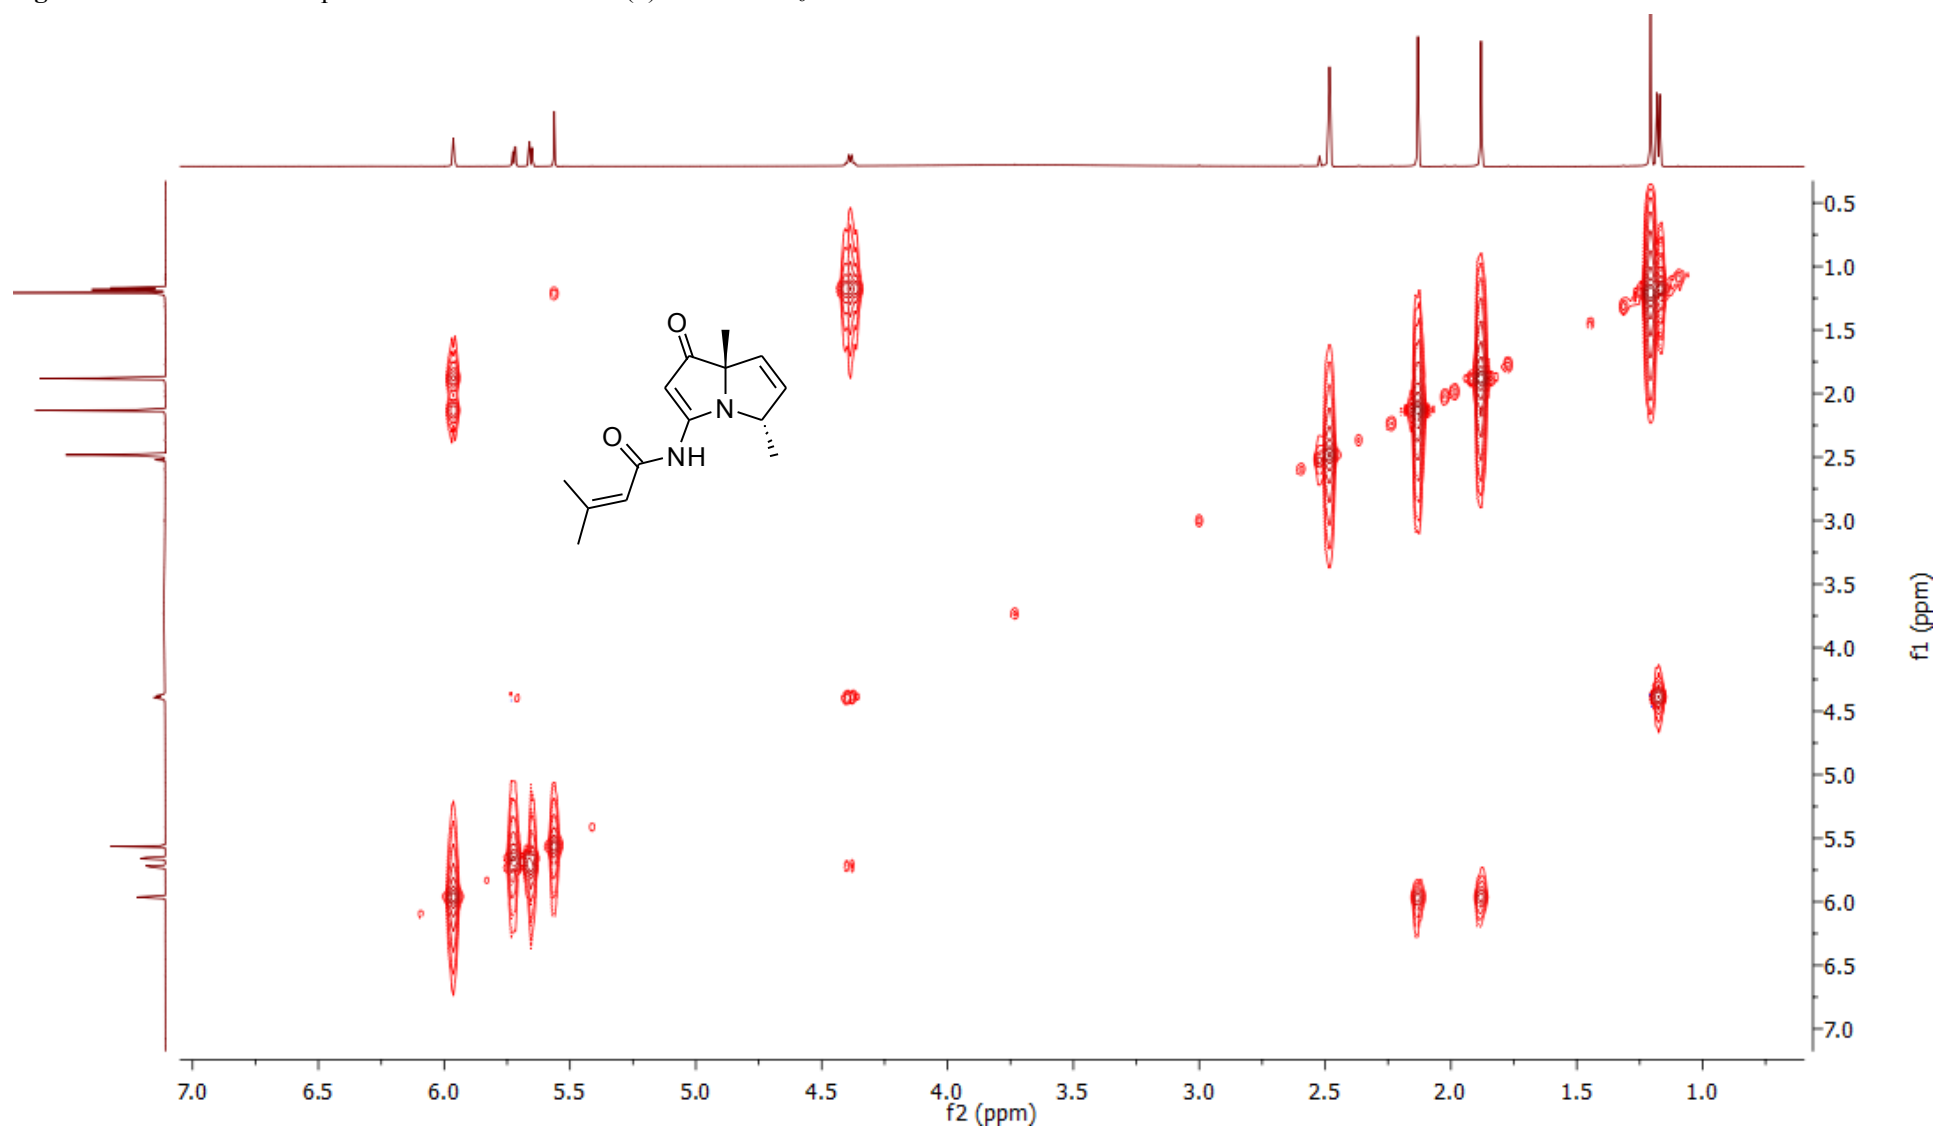



Figure S38. HSQC spectrum of bohemamine F (5) in DMSO- $d_6$

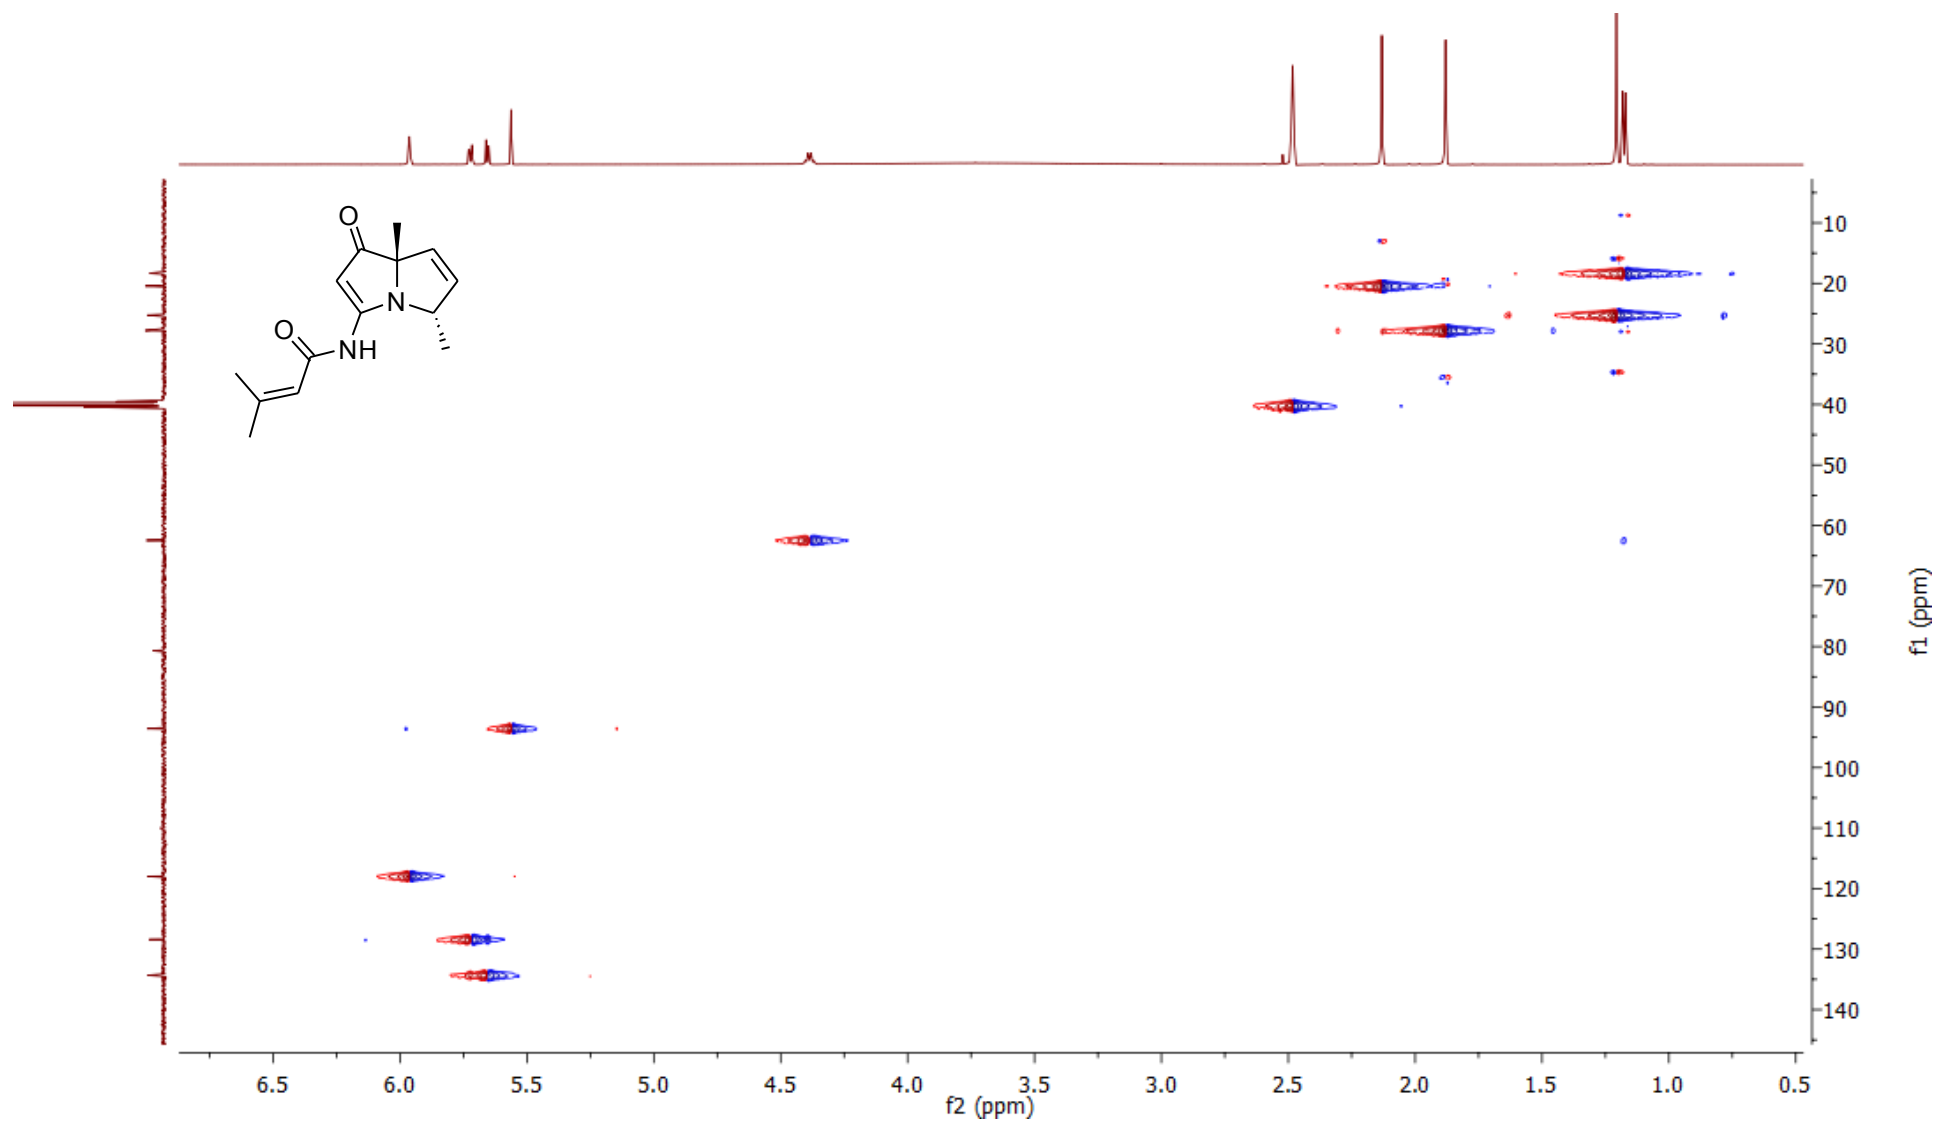

Figure S39. HMBC spectrum of bohemamine F (5) in DMSO-*d*<sub>6</sub>

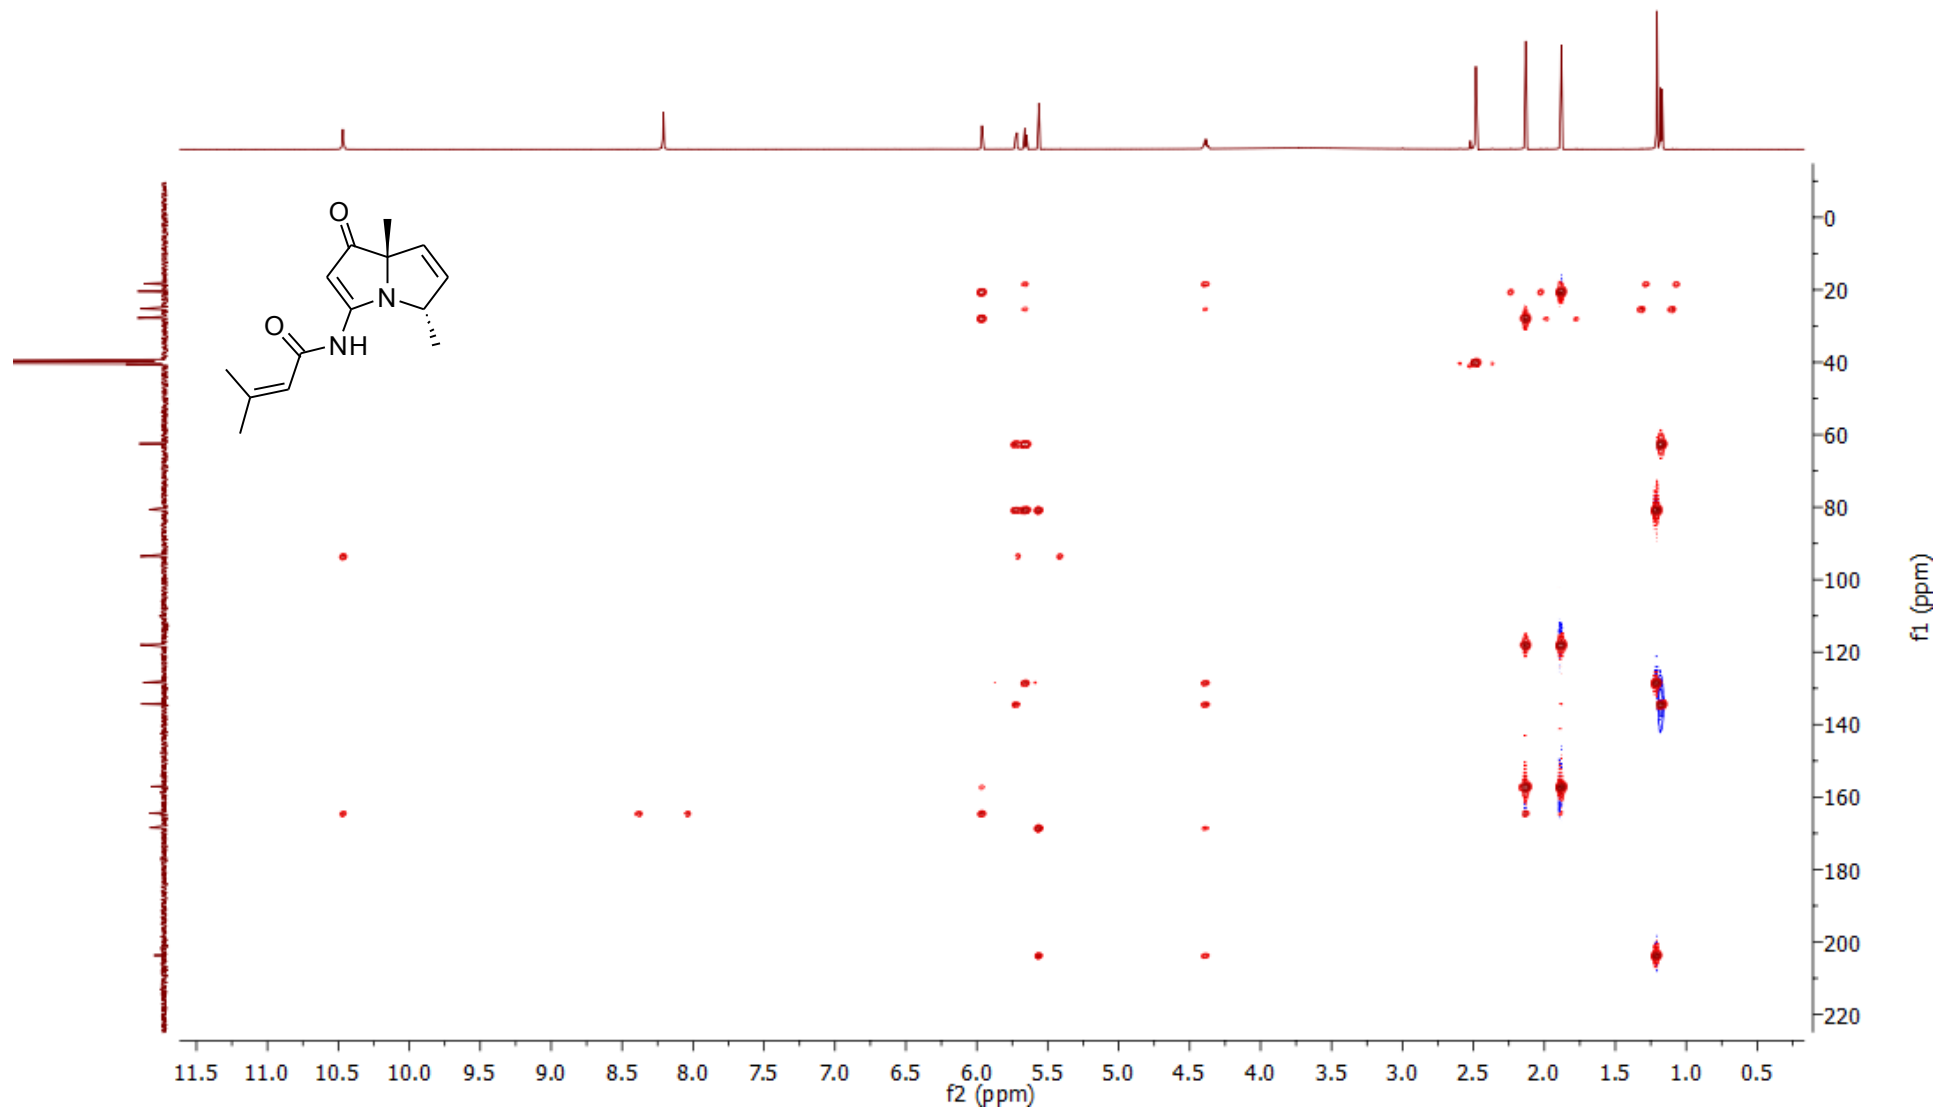

Figure S40. NOESY spectrum of bohemamine F (**5**) in DMSO- $d_6$

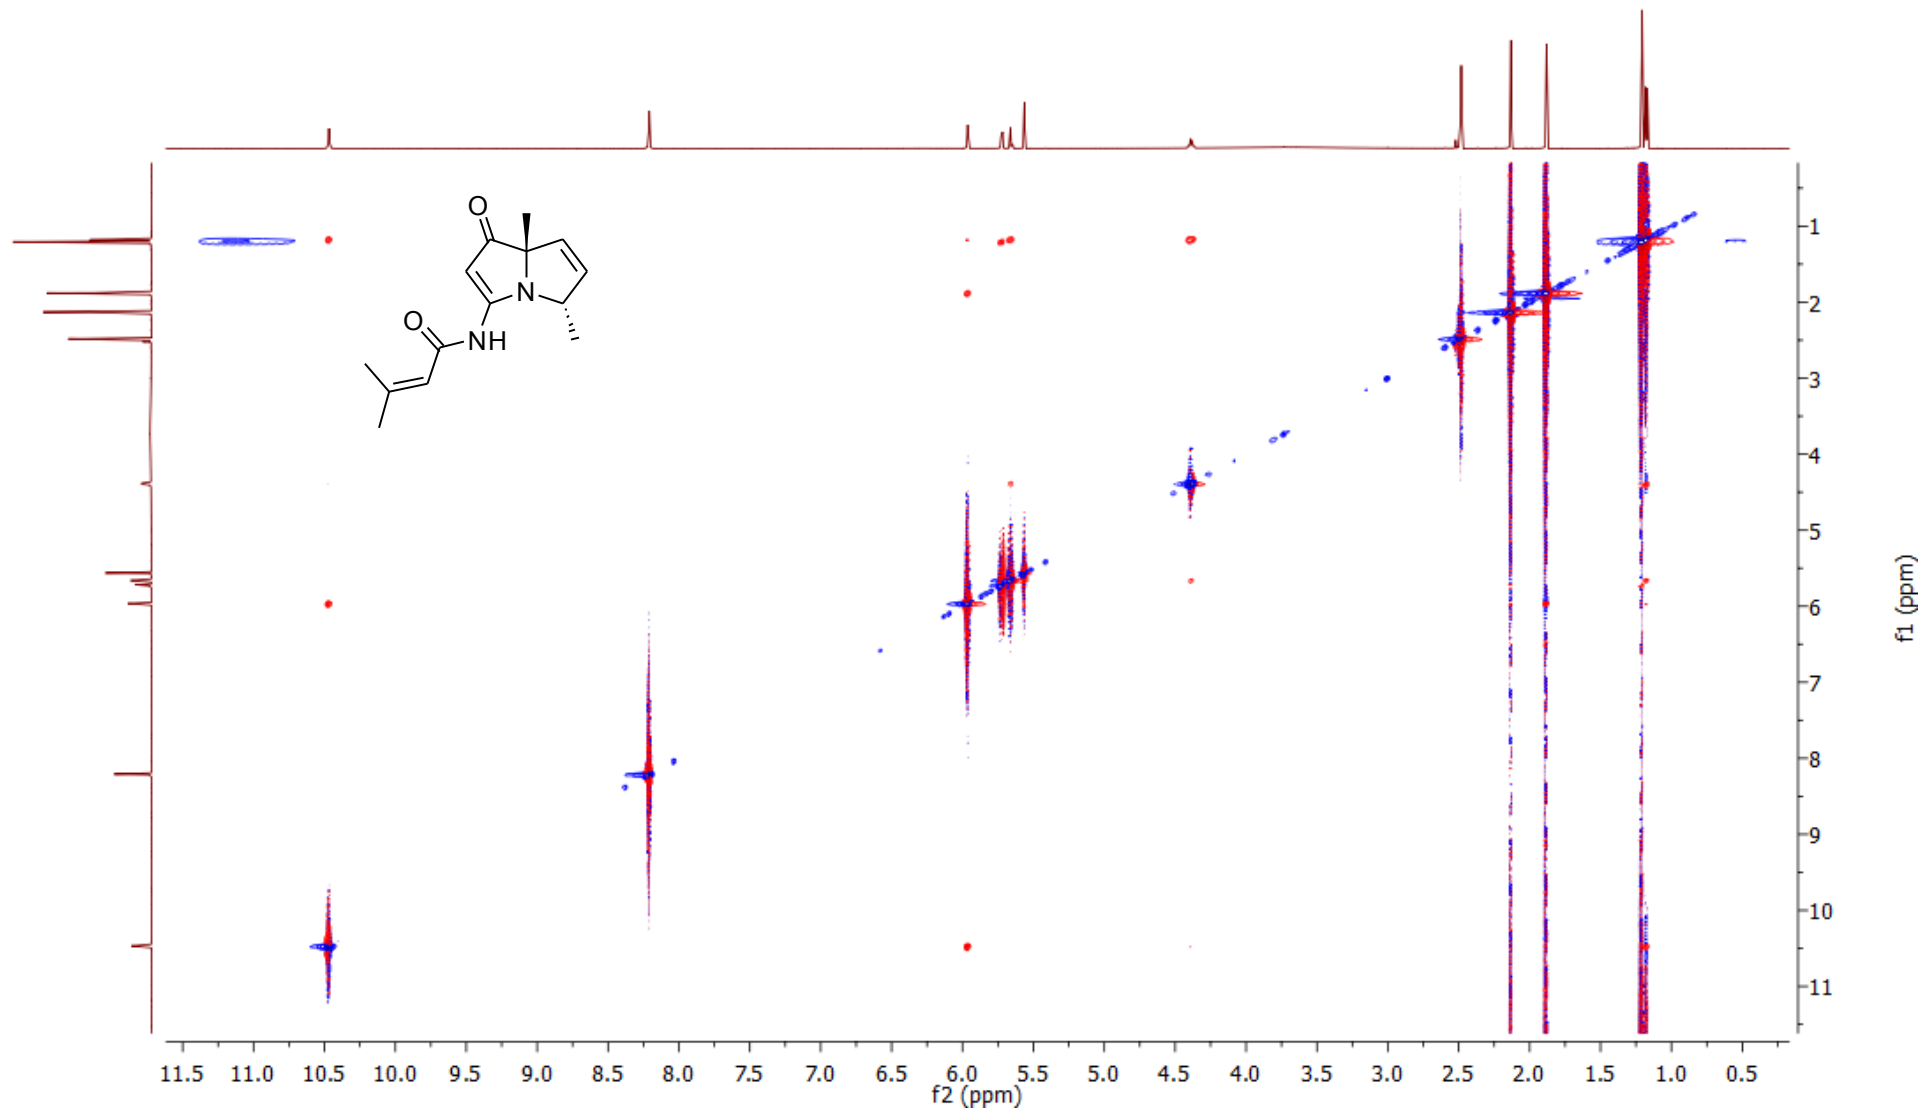

Figure S41. HRESIMS spectrum of bohemamine G (6)

Polarity/Scan Type: **Positive**

Sample Name: U6JM8177

Acq. File: 040215010.wiff

Acq. Date: Thursday, April 02, 20

Max. 4.4e5 counts.

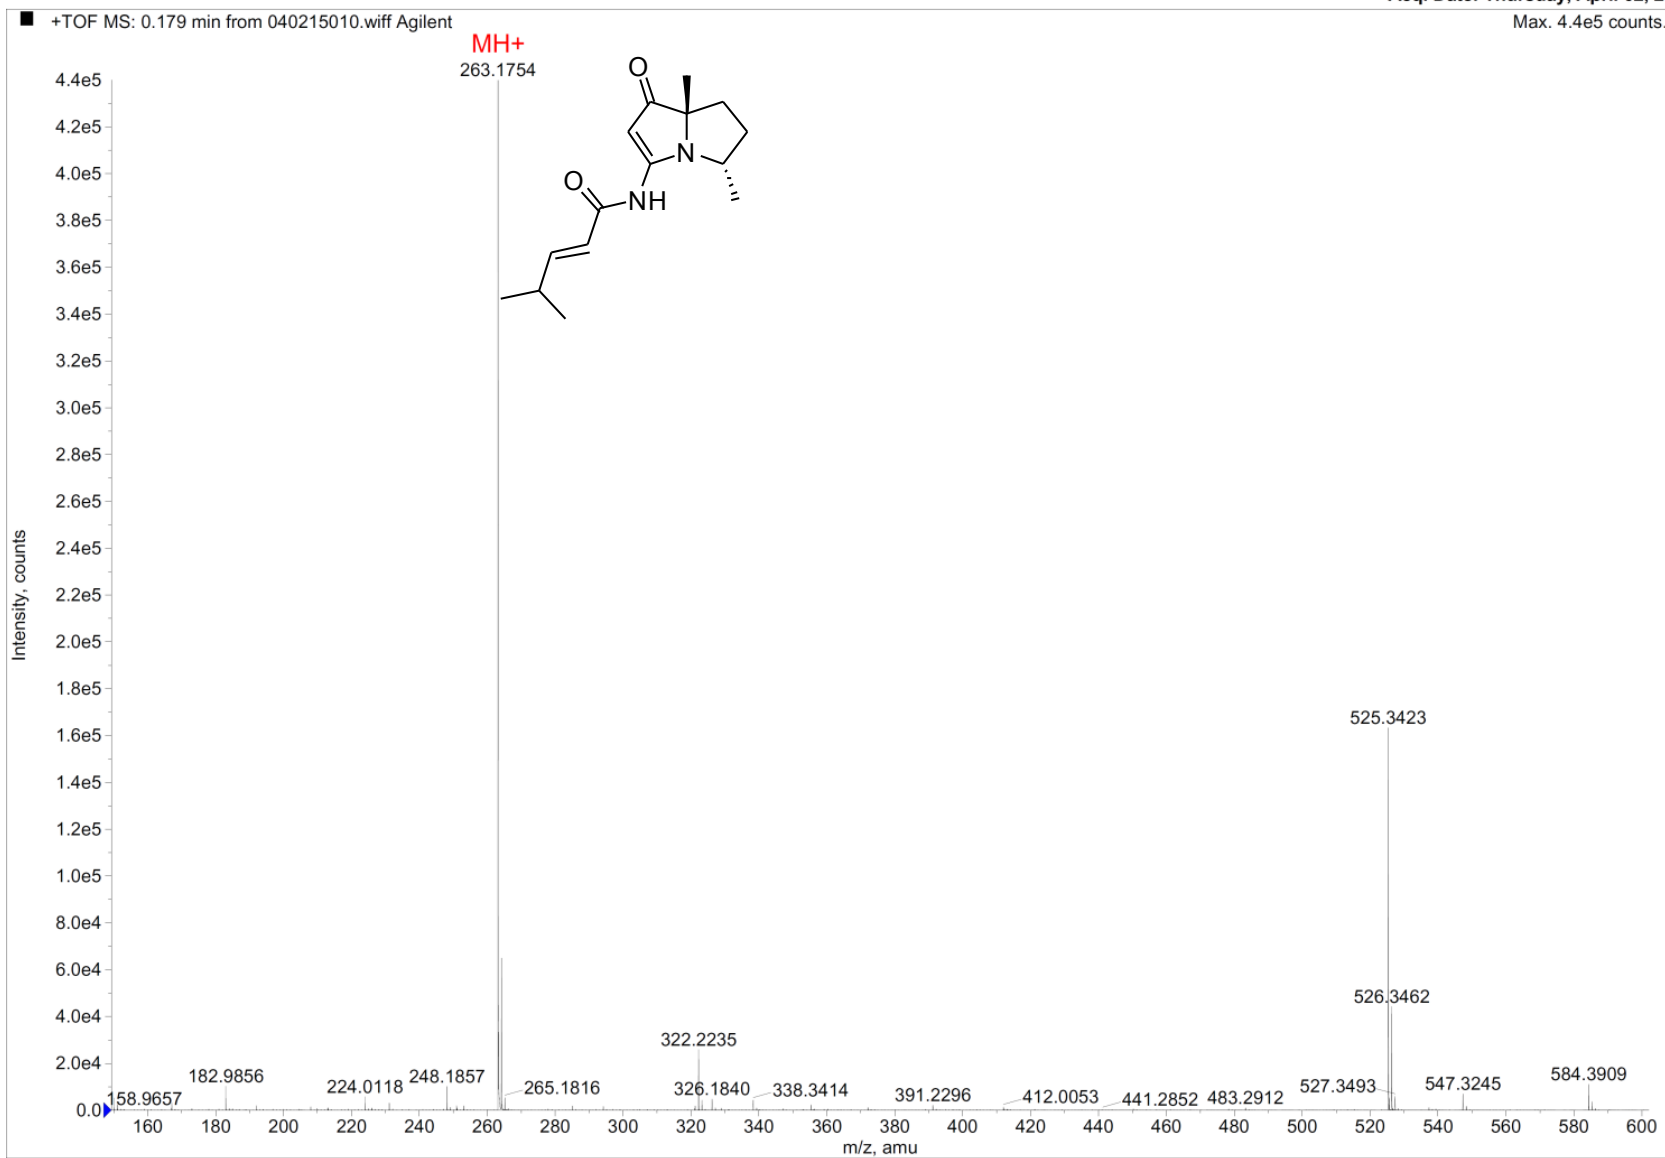

Figure S42. <sup>1</sup>H-NMR spectrum of bohemamine G (6) in DMSO-*d*<sub>6</sub>

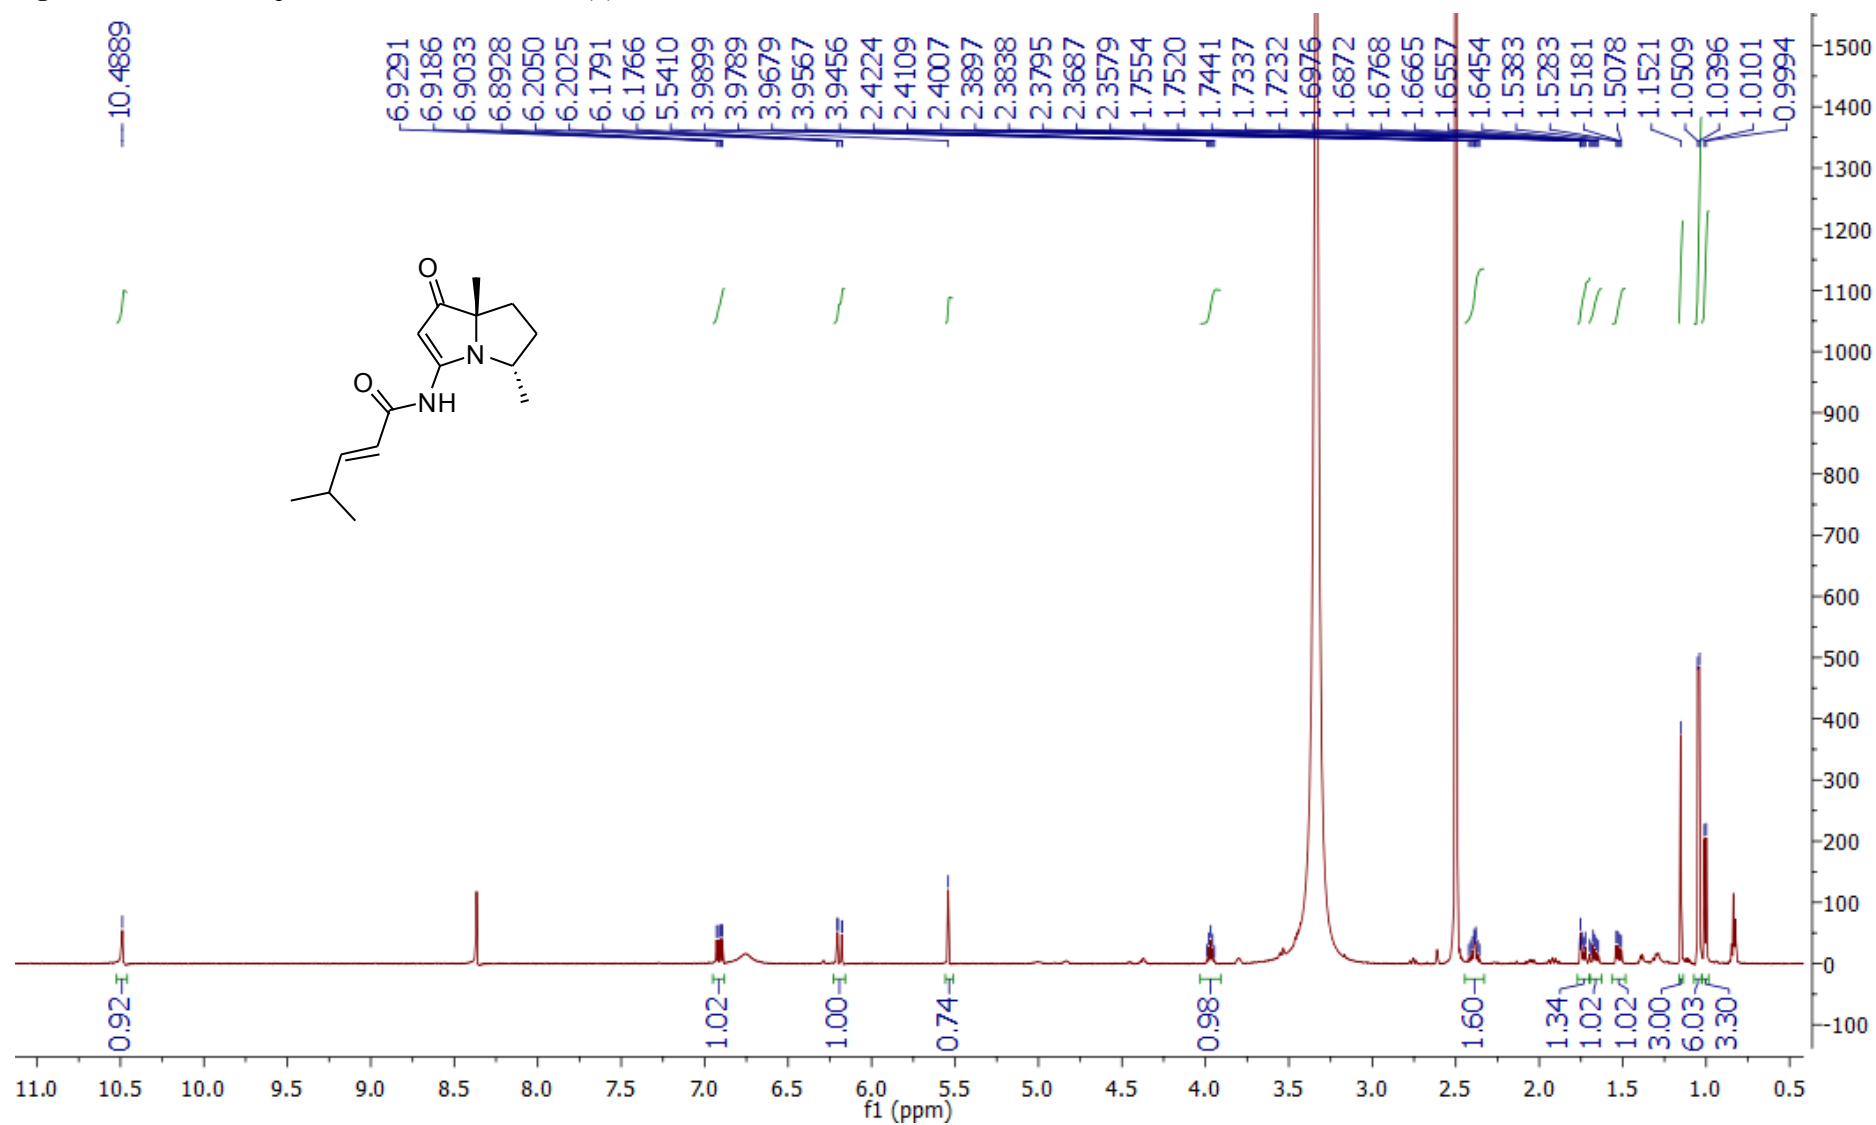

Figure S43.  $^{13}\text{C}$ -NMR spectrum of bohemamine G (**6**) in  $\text{DMSO-}d_6$

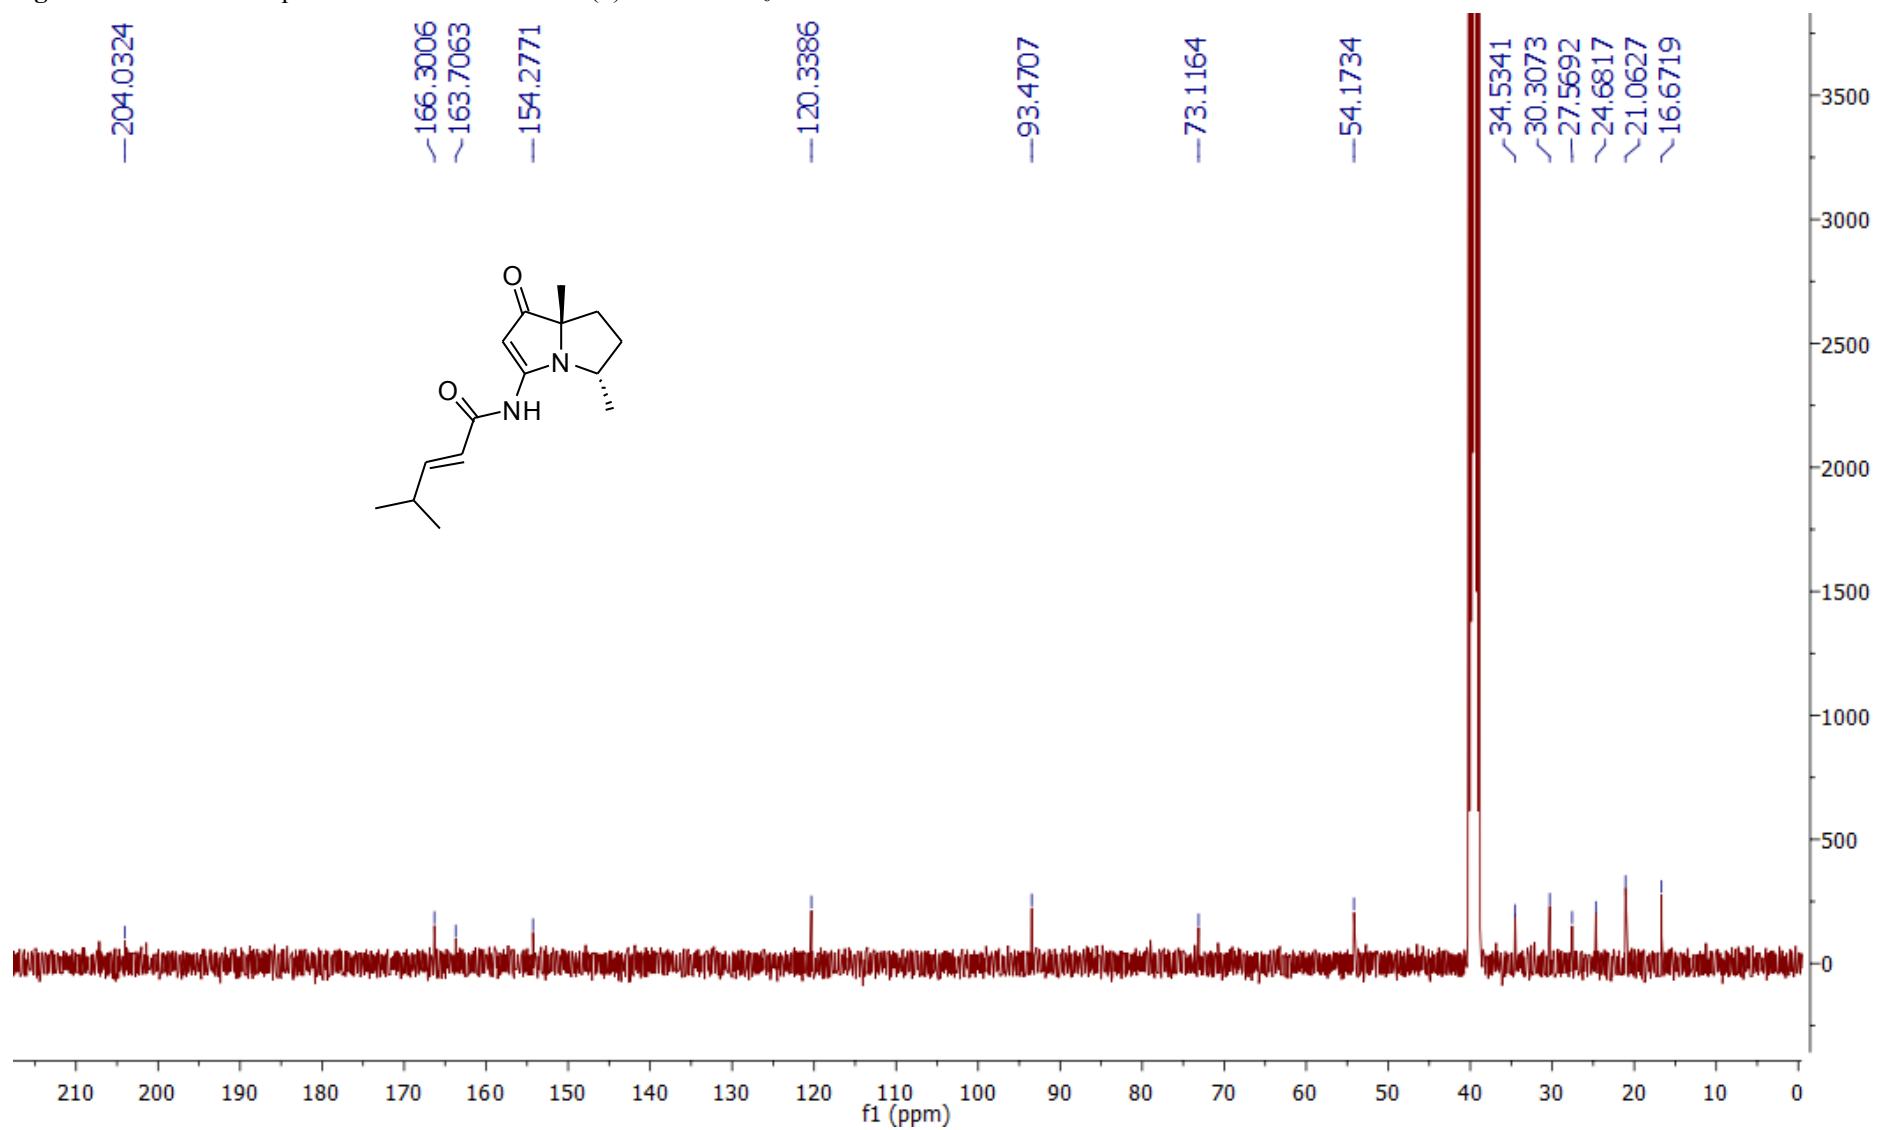

Figure S44.  $^1\text{H}$ - $^1\text{H}$  COSY spectrum of bohemamine G (**6**) in  $\text{DMSO-}d_6$

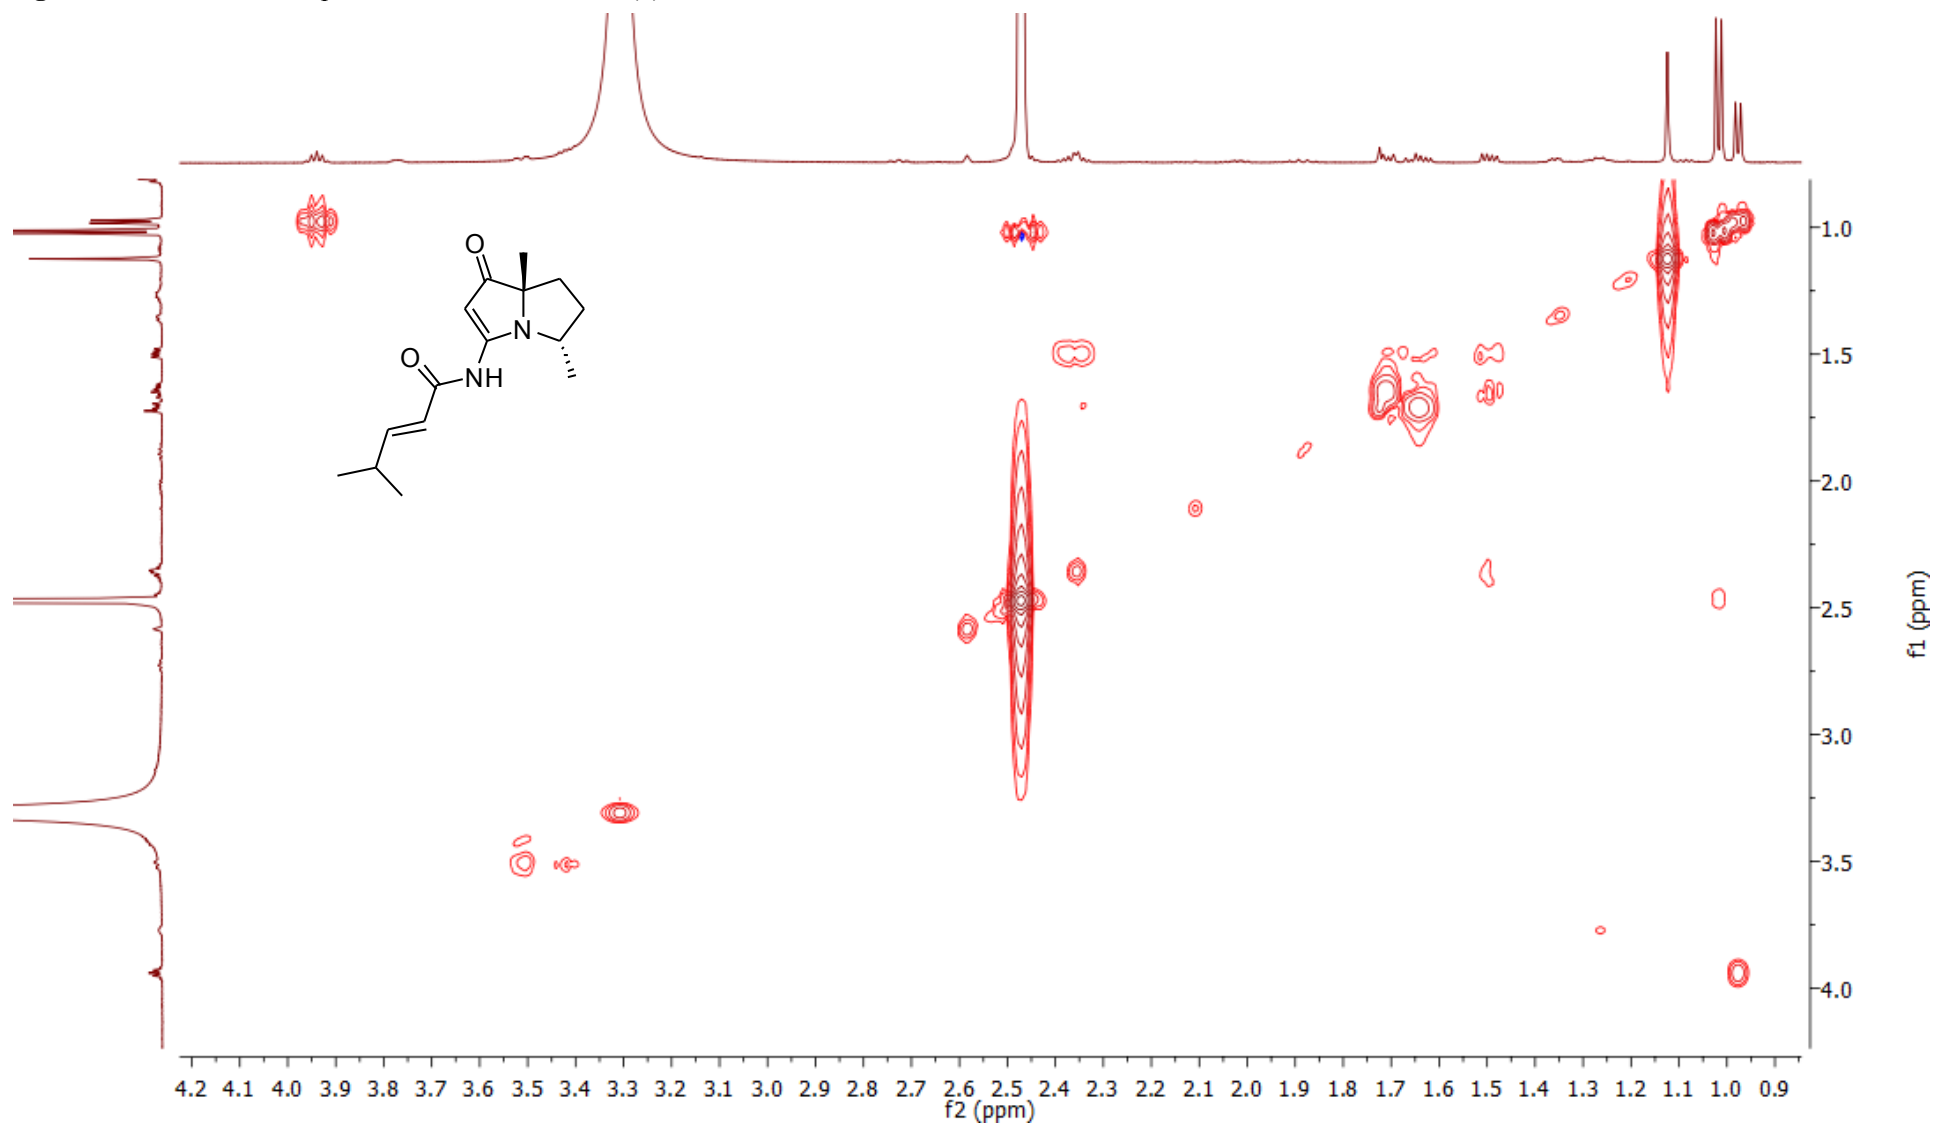

Figure S45. HSQC spectrum of bohemamine G (6) in DMSO- $d_6$

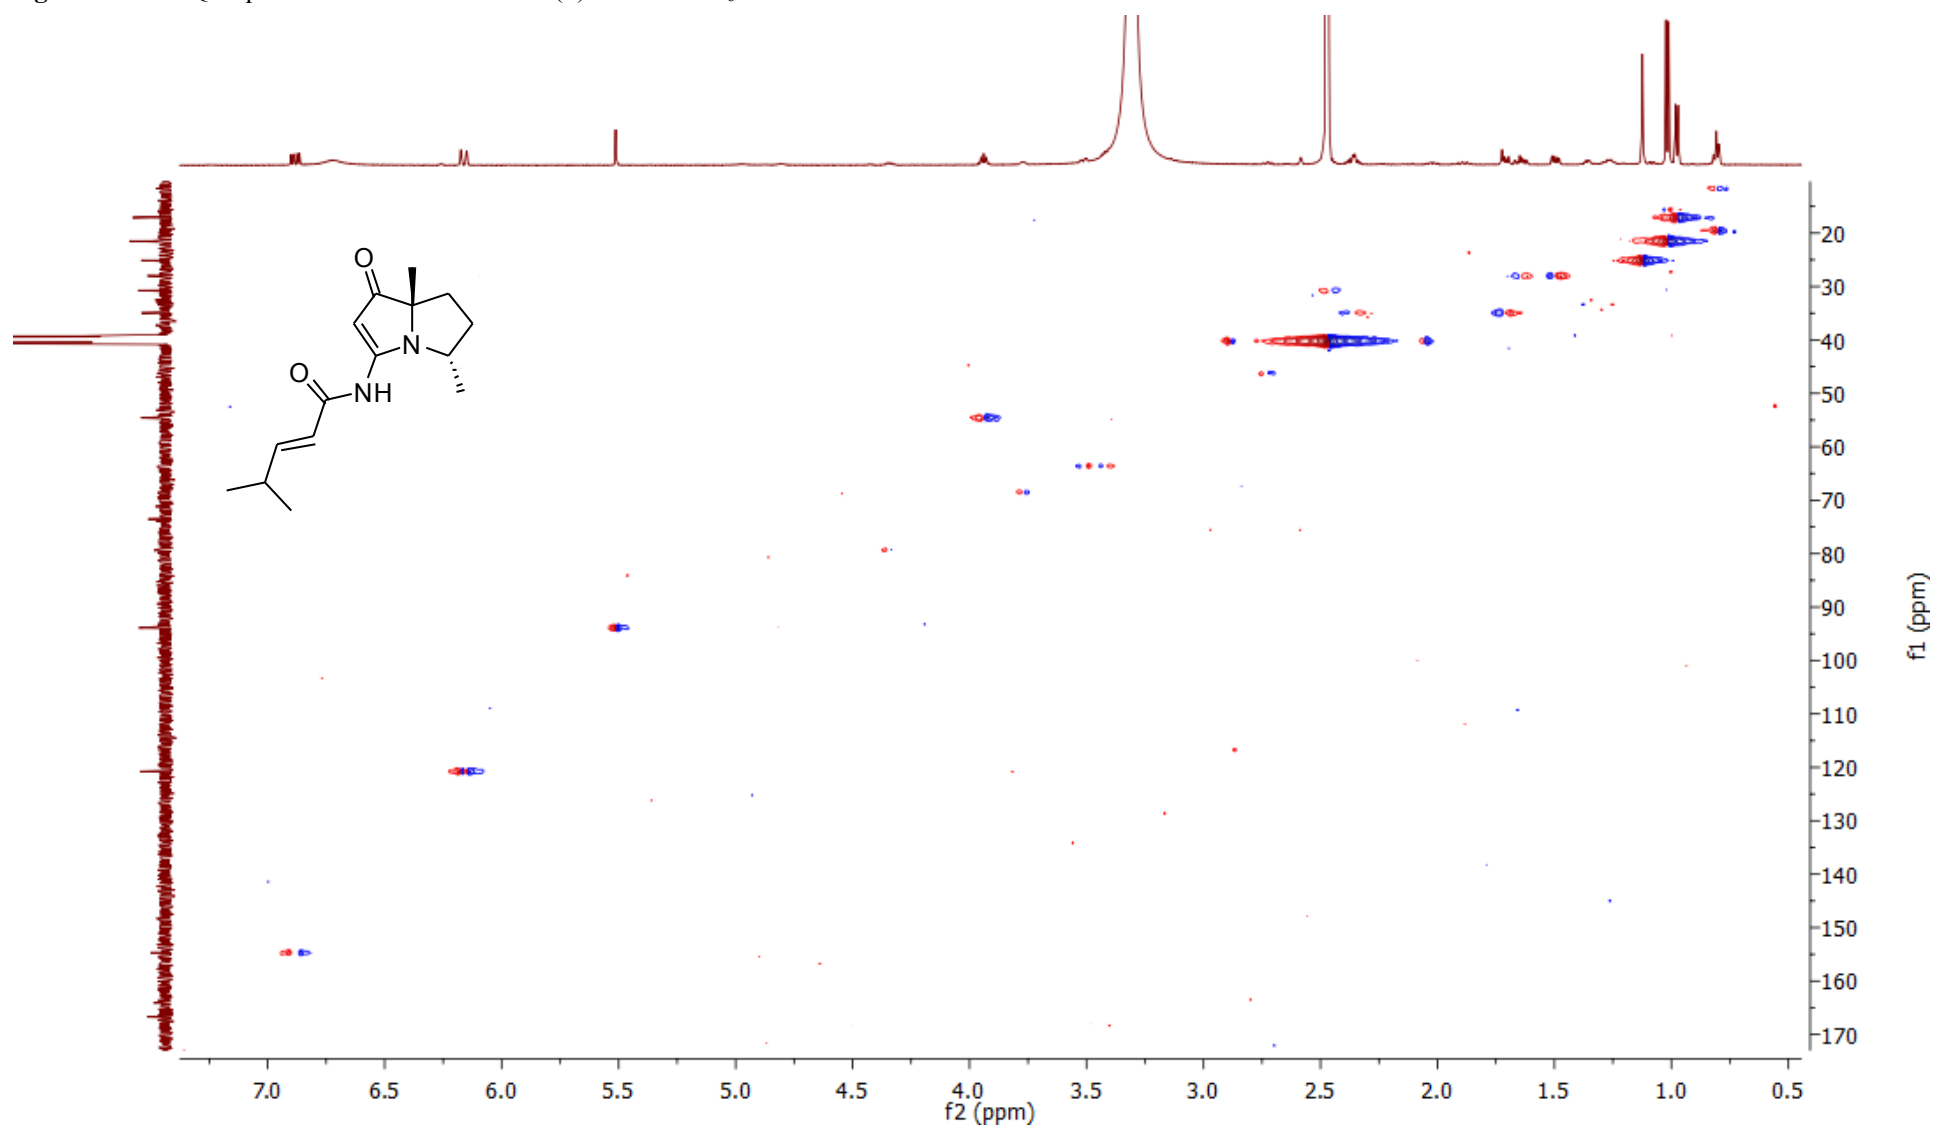



Figure S46. HMBC spectrum of boheminamine G (6) in DMSO- $d_6$

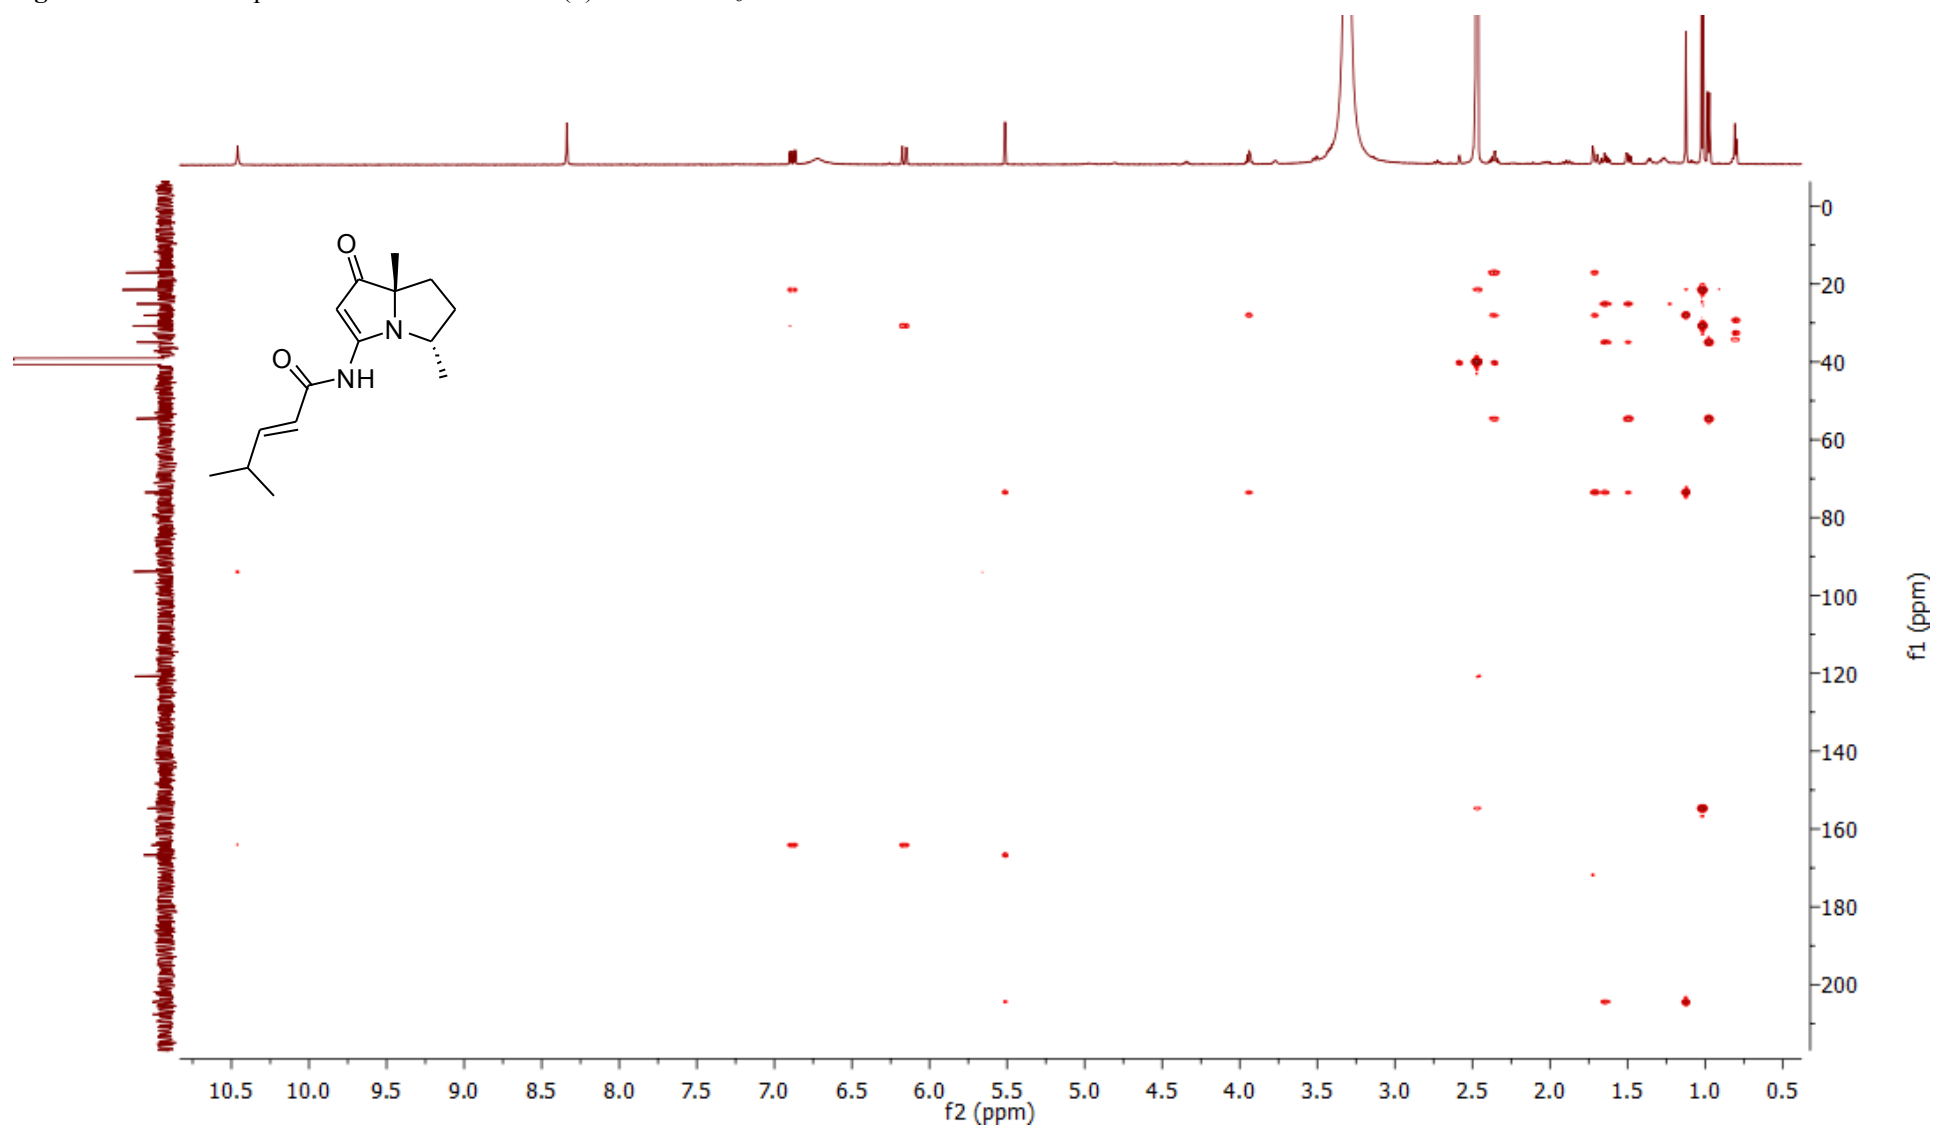

Figure S47. NOESY spectrum of bohemamine G (**6**) in DMSO- $d_6$

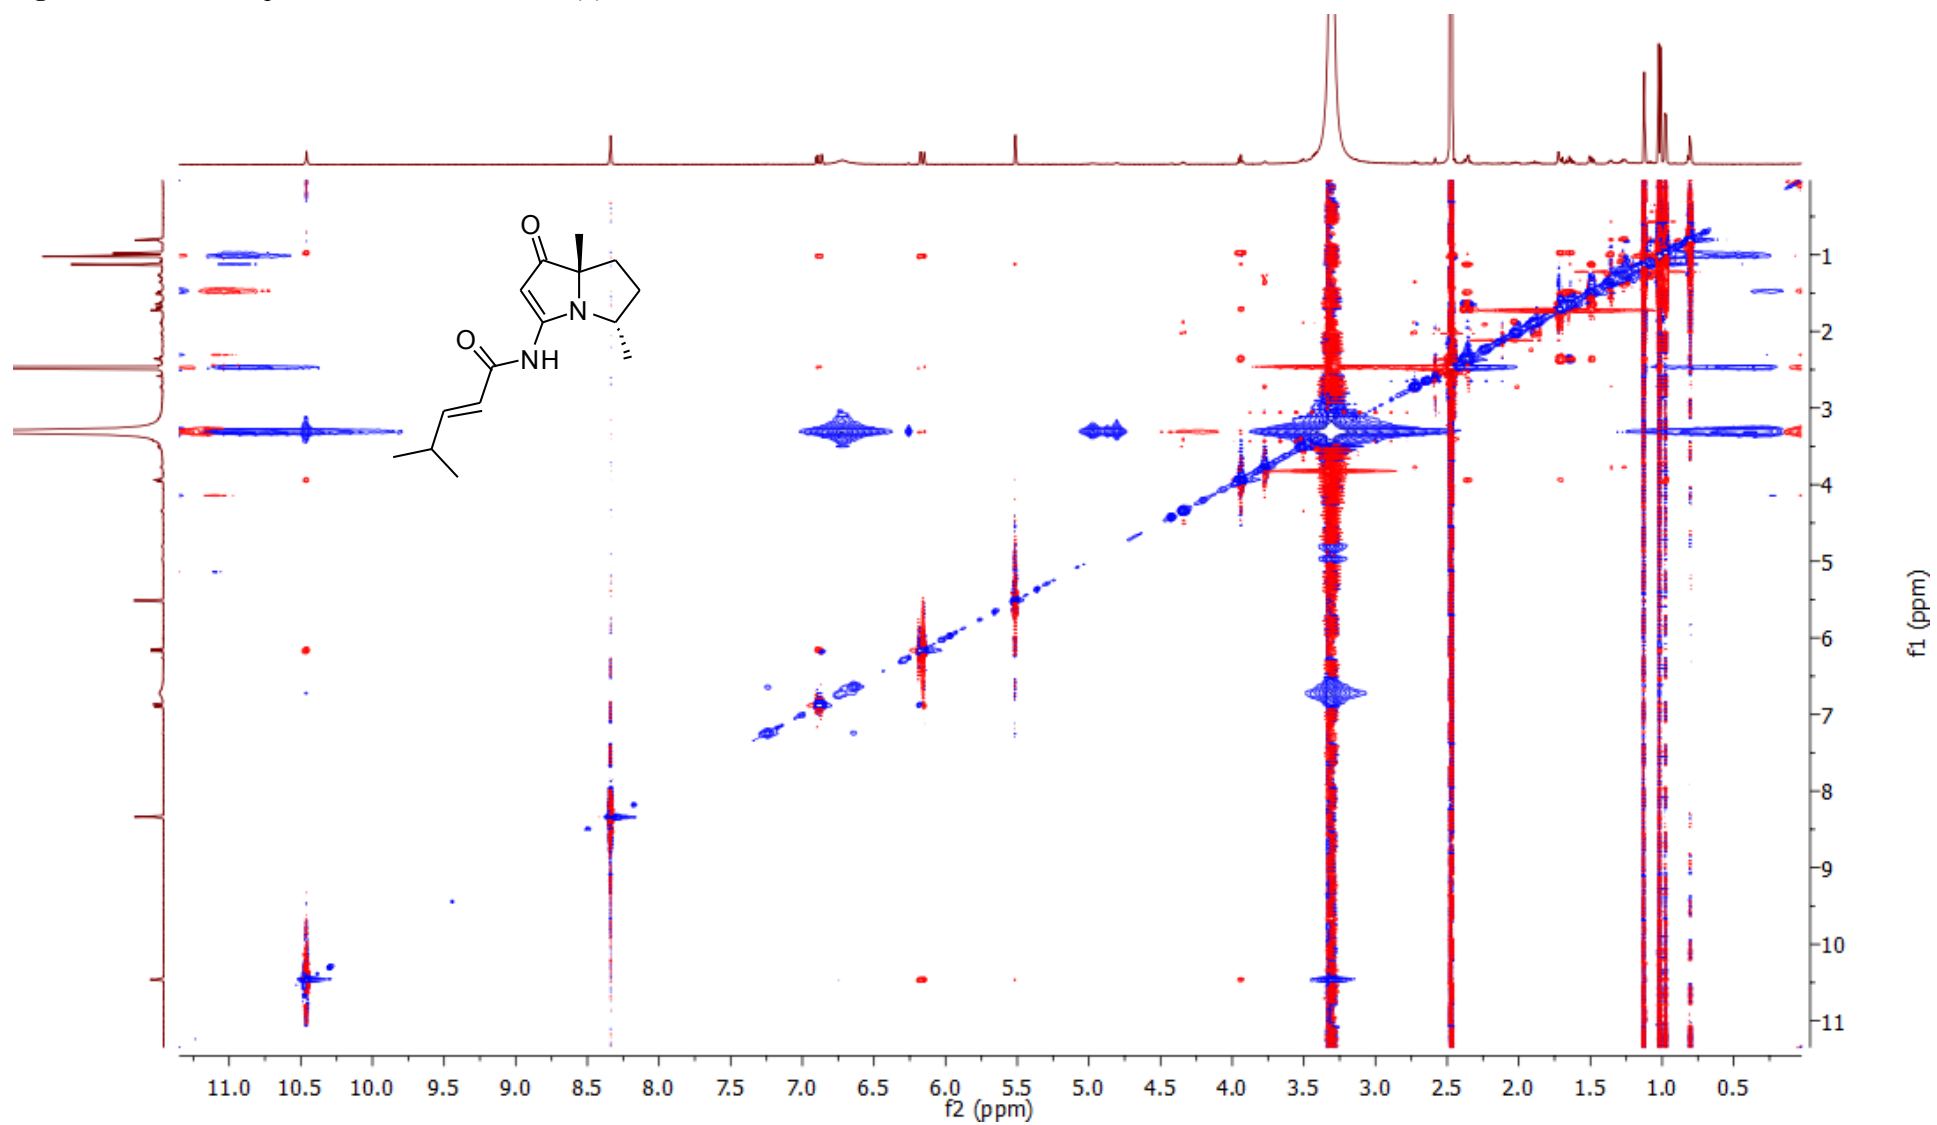

Figure S48. HRESIMS spectrum of bohemamine H (7)

Polarity/Scan Type: **Positive**

Sample Name: U6JM8178

Acq. File: 040215011.wiff  
Acq. Date: Thursday, April 02, 20

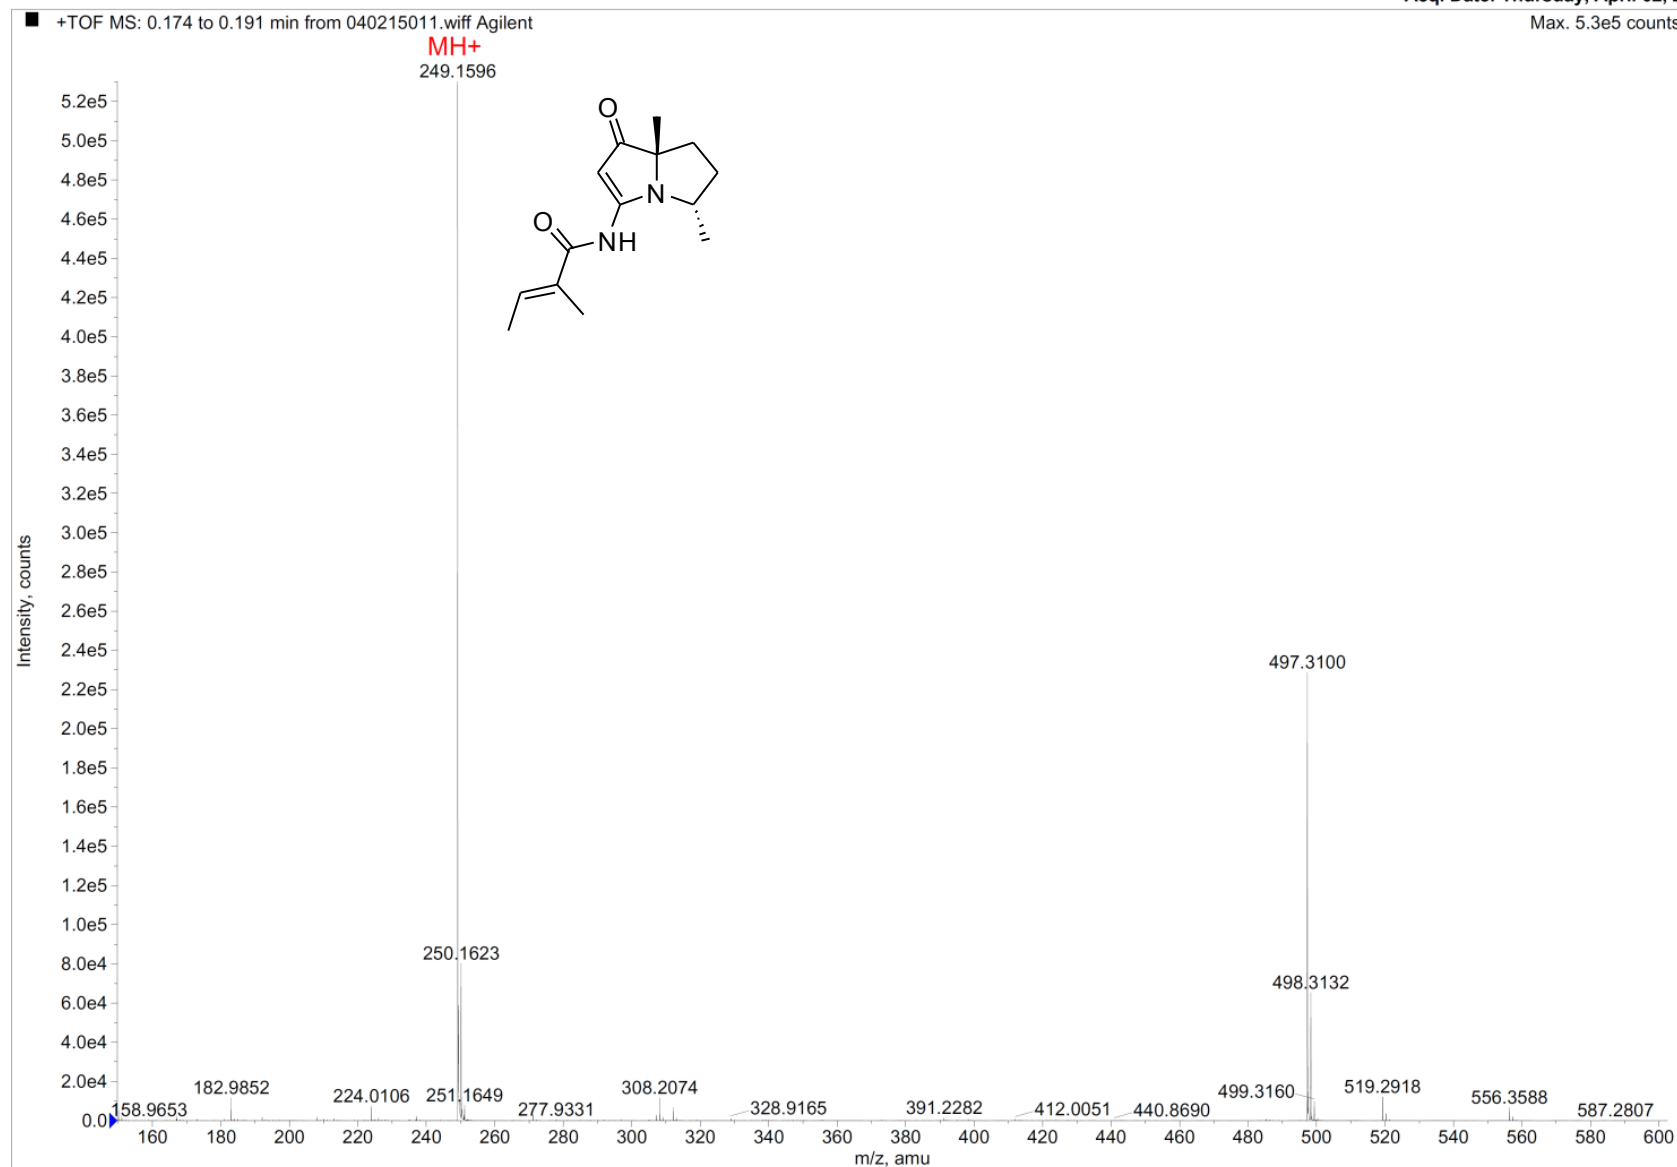

Figure S49. <sup>1</sup>H-NMR spectrum of bohemamine H (7) in DMSO-d<sub>6</sub>

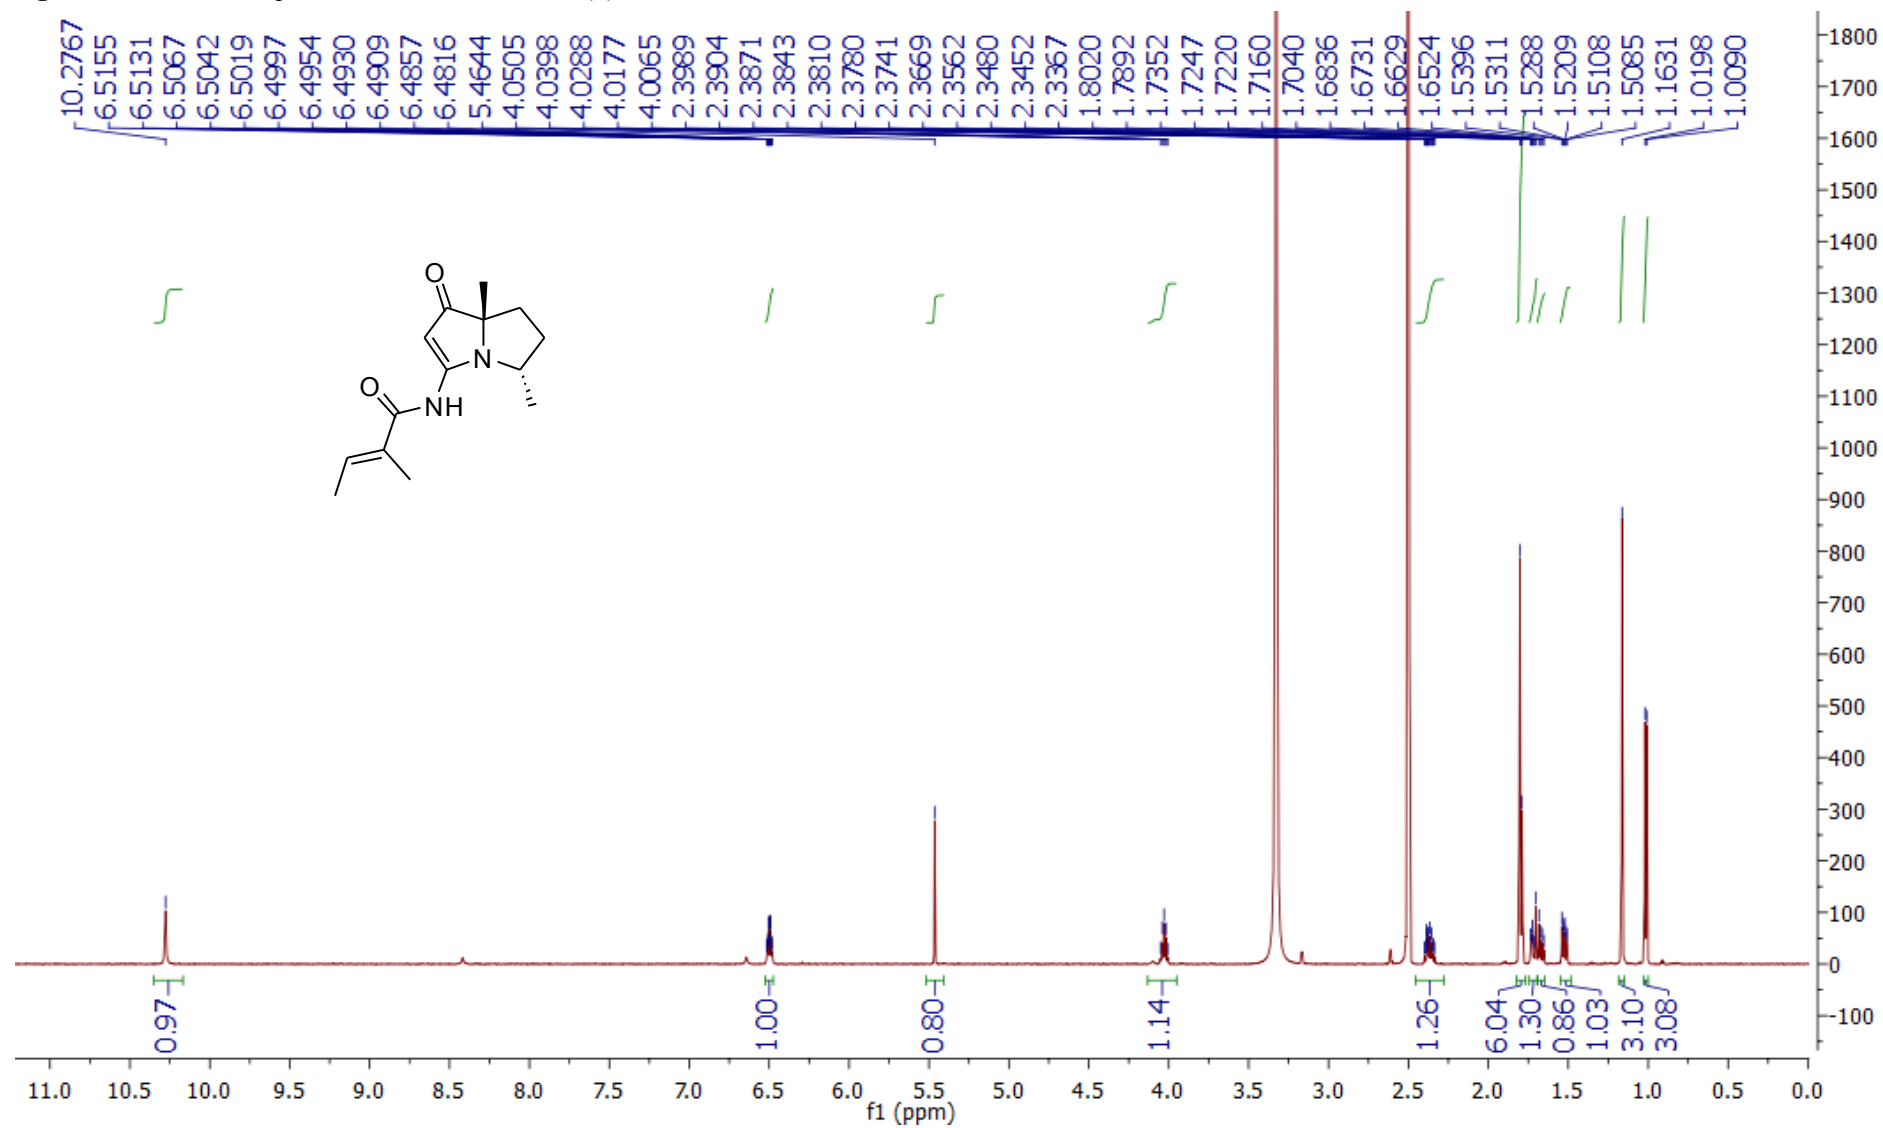

Figure S50.  $^{13}\text{C}$ -NMR spectrum of bohemamine H (7) in  $\text{DMSO-}d_6$

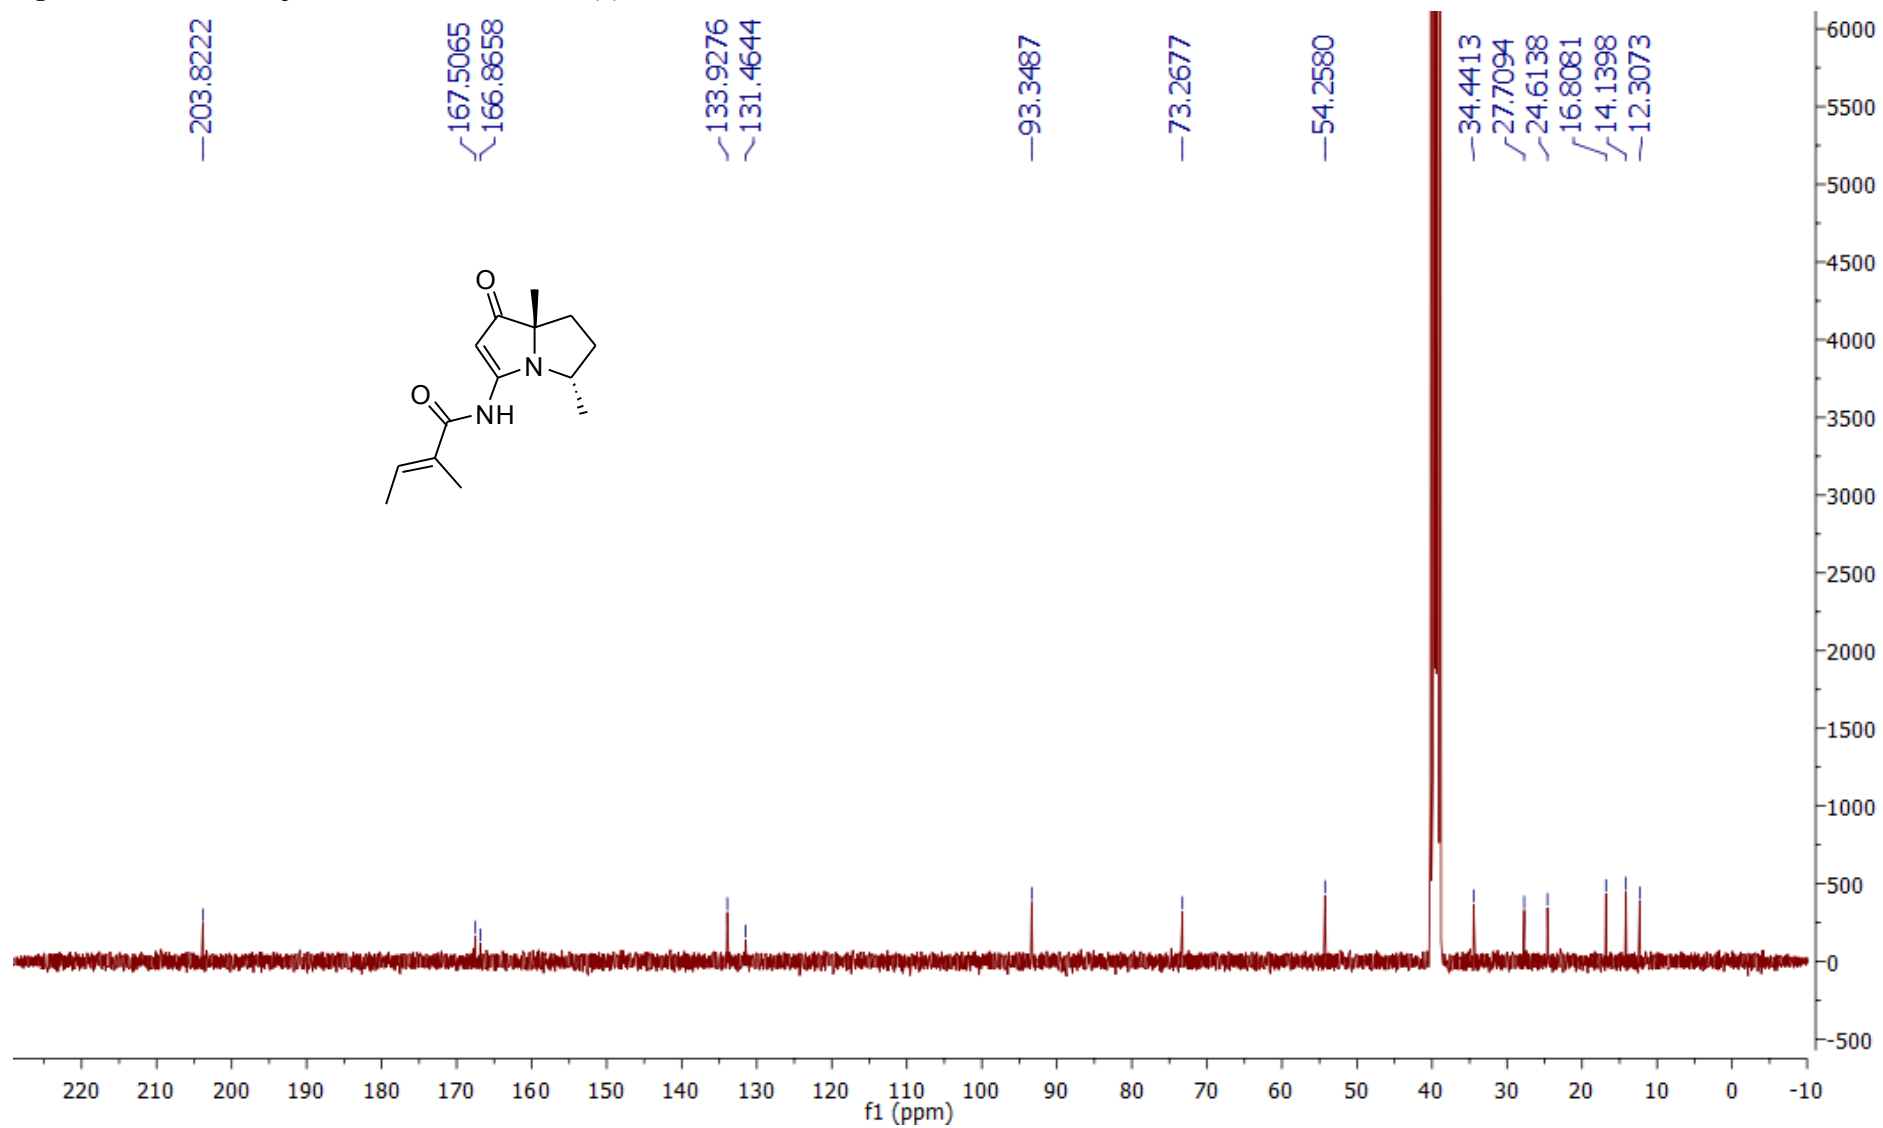

Figure S51.  $^1\text{H}$ - $^1\text{H}$  COSY spectrum of bohemamine H (7) in  $\text{DMSO-}d_6$

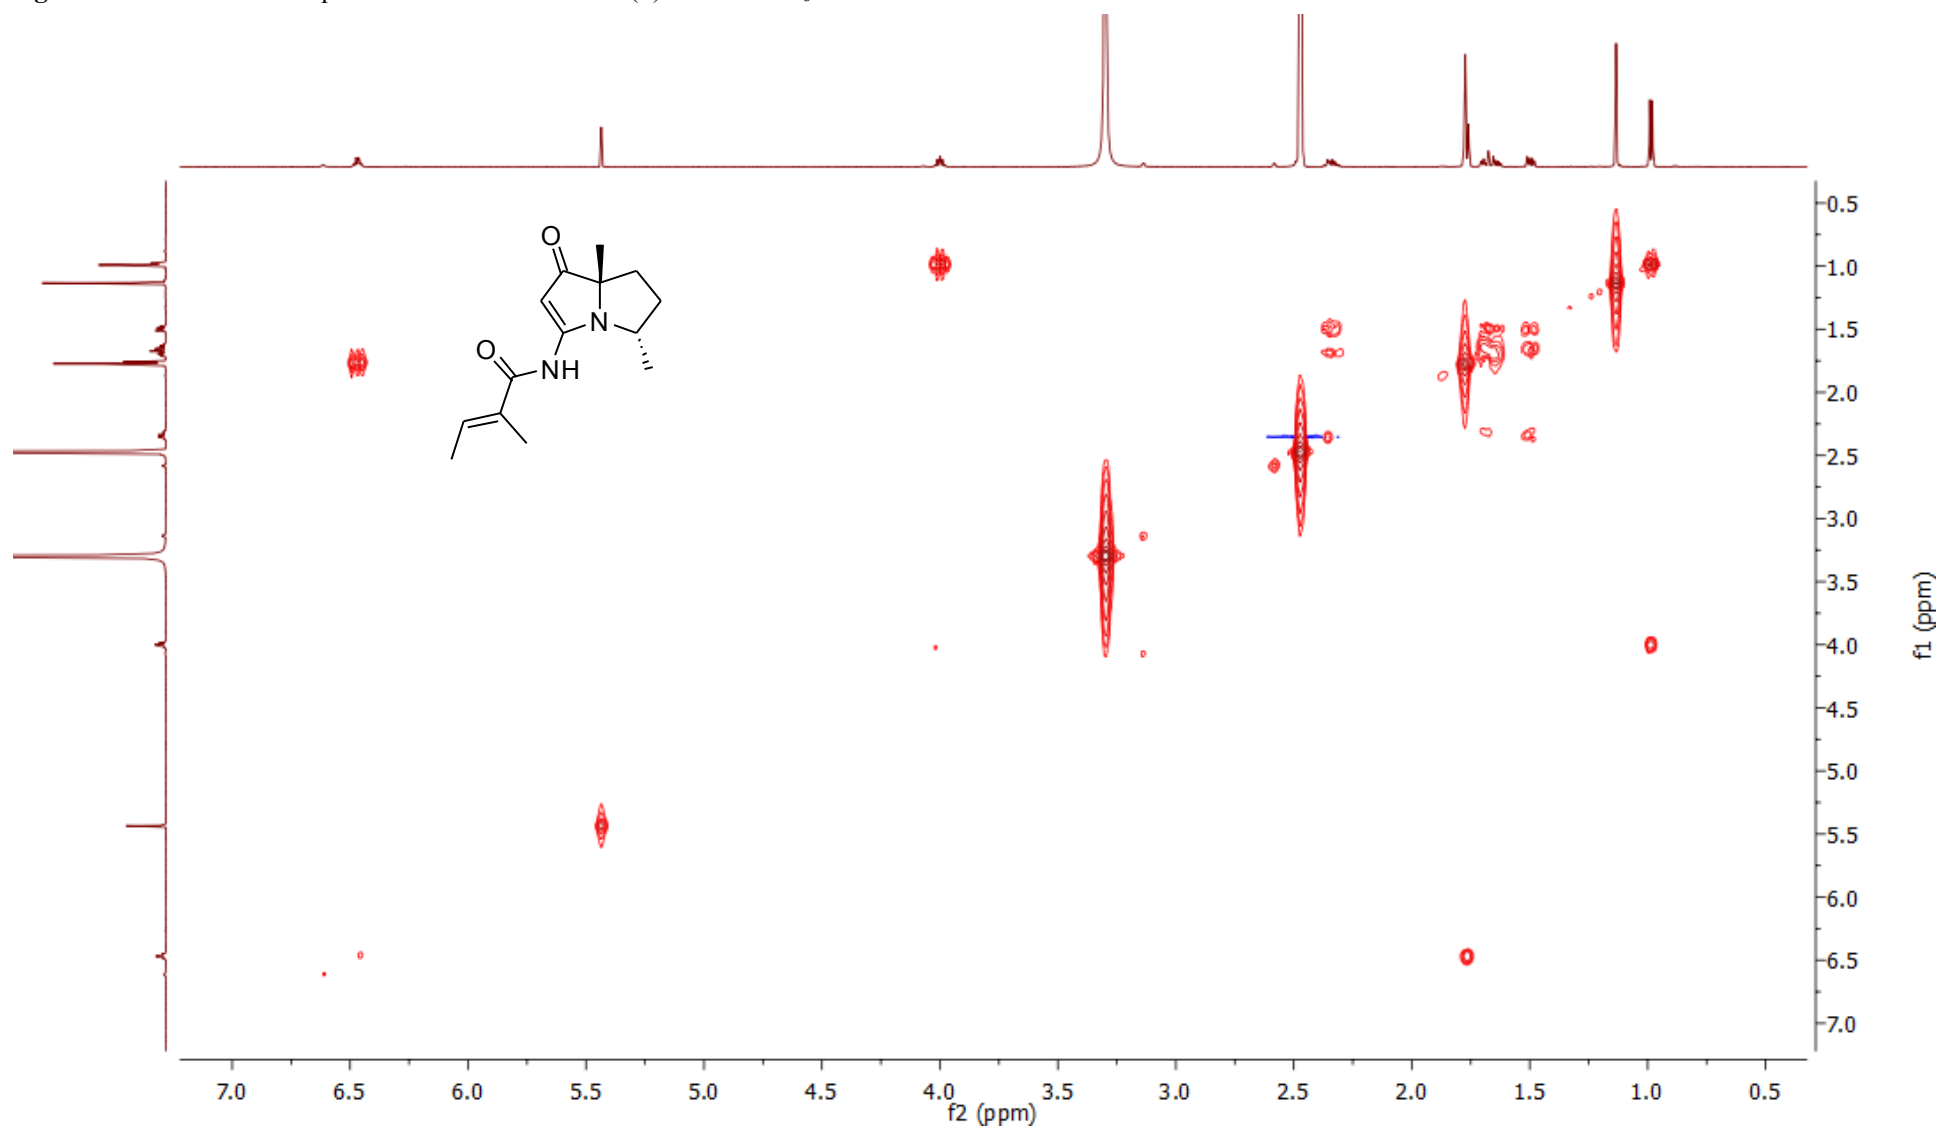

Figure S52. HSQC spectrum of bohemamine H (7) in DMSO- $d_6$

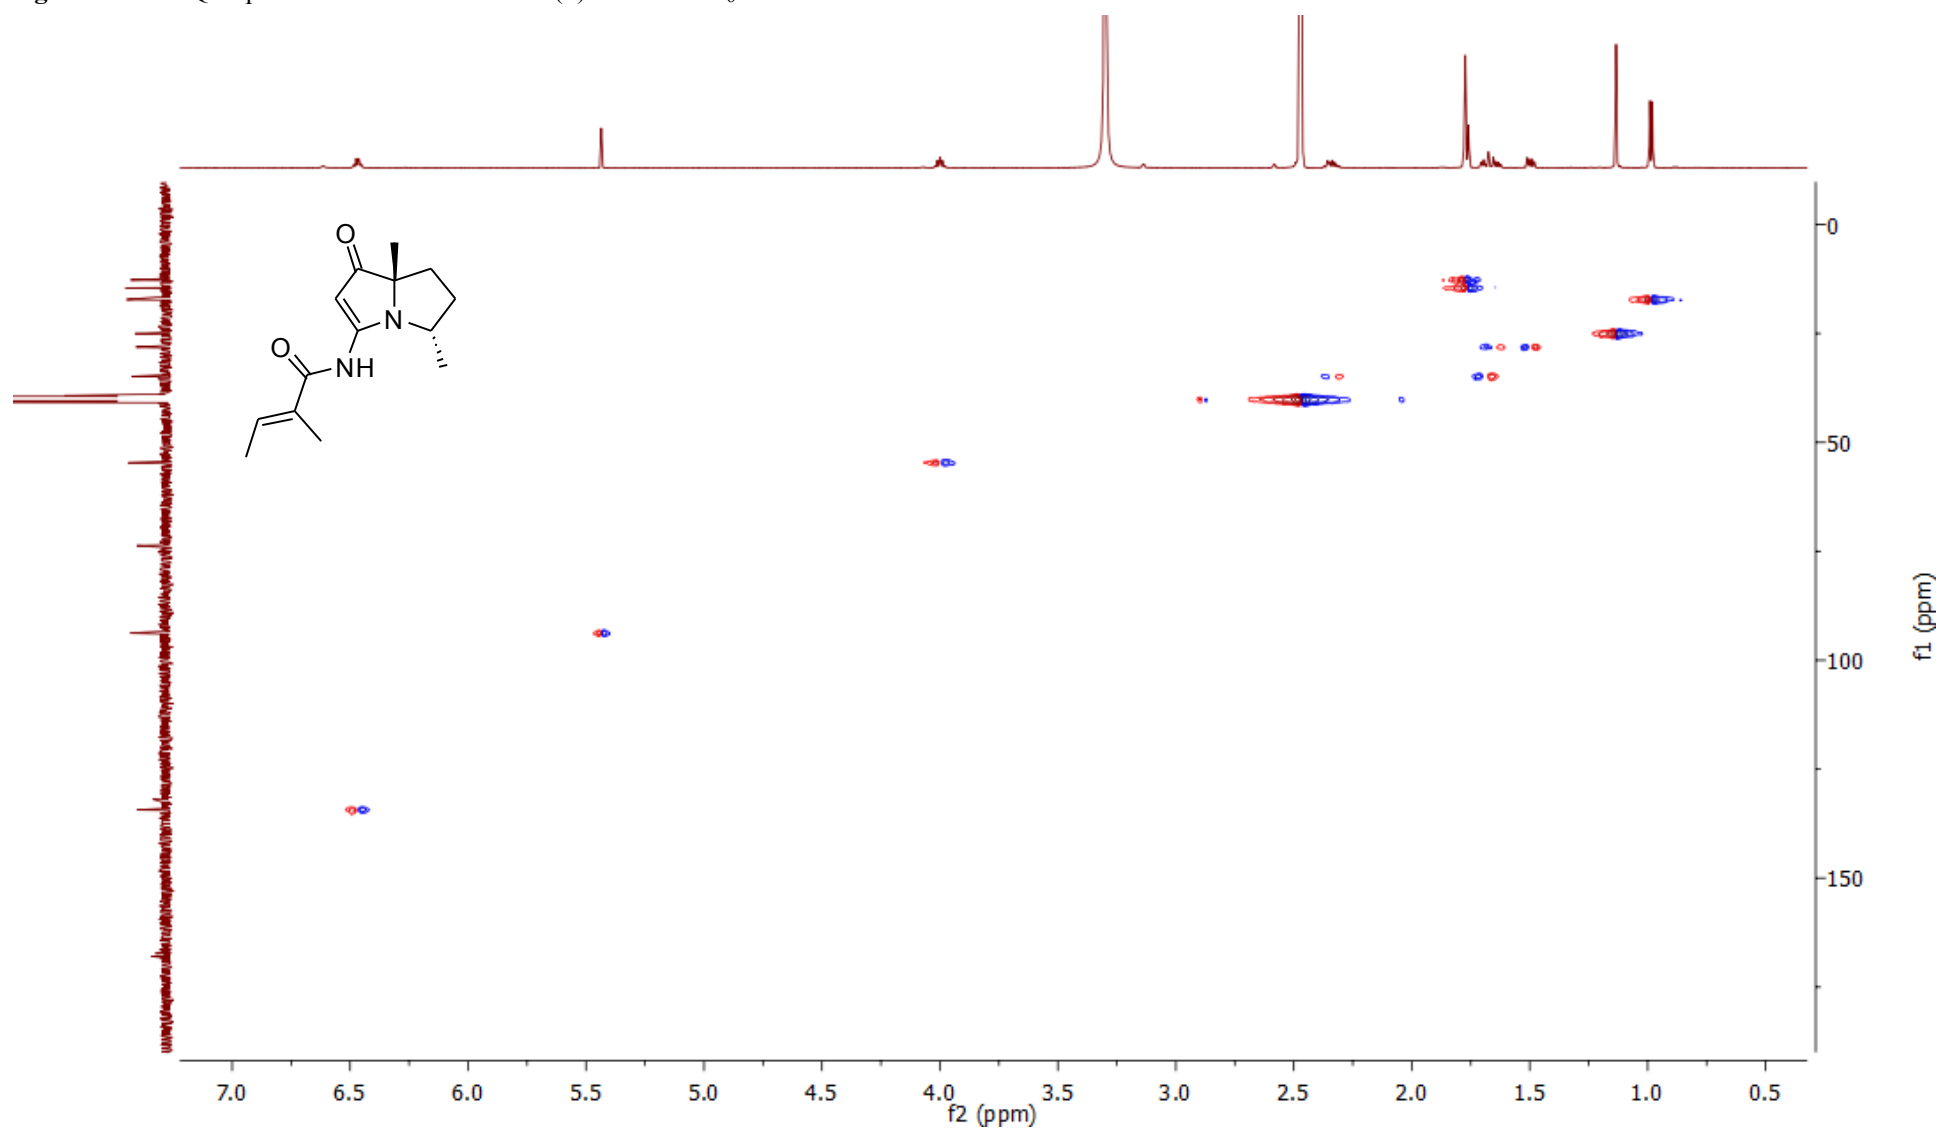

Figure S53. HMBC spectrum of bohemamine H (7) in DMSO- $d_6$

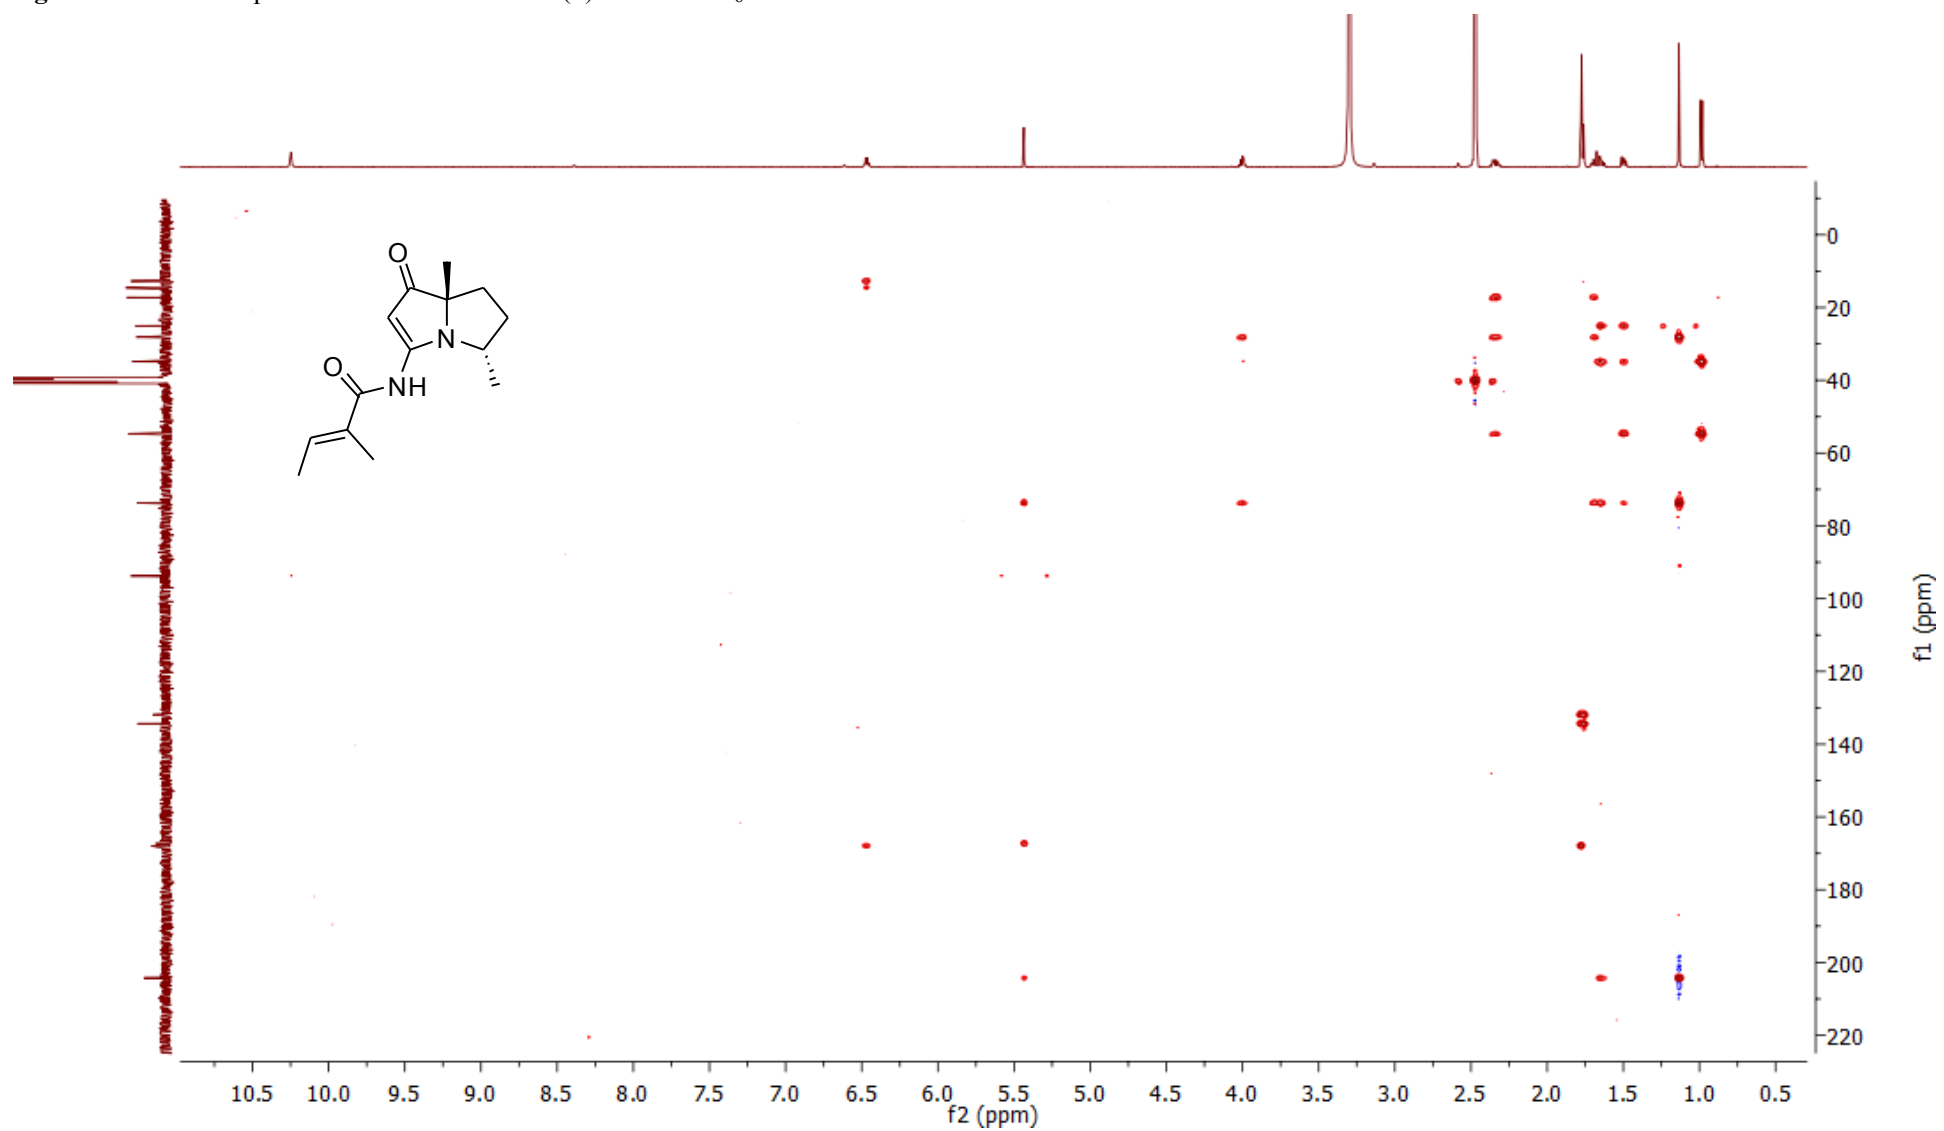



Figure S54. NOESY spectrum of bohemamine H (7) in DMSO- $d_6$

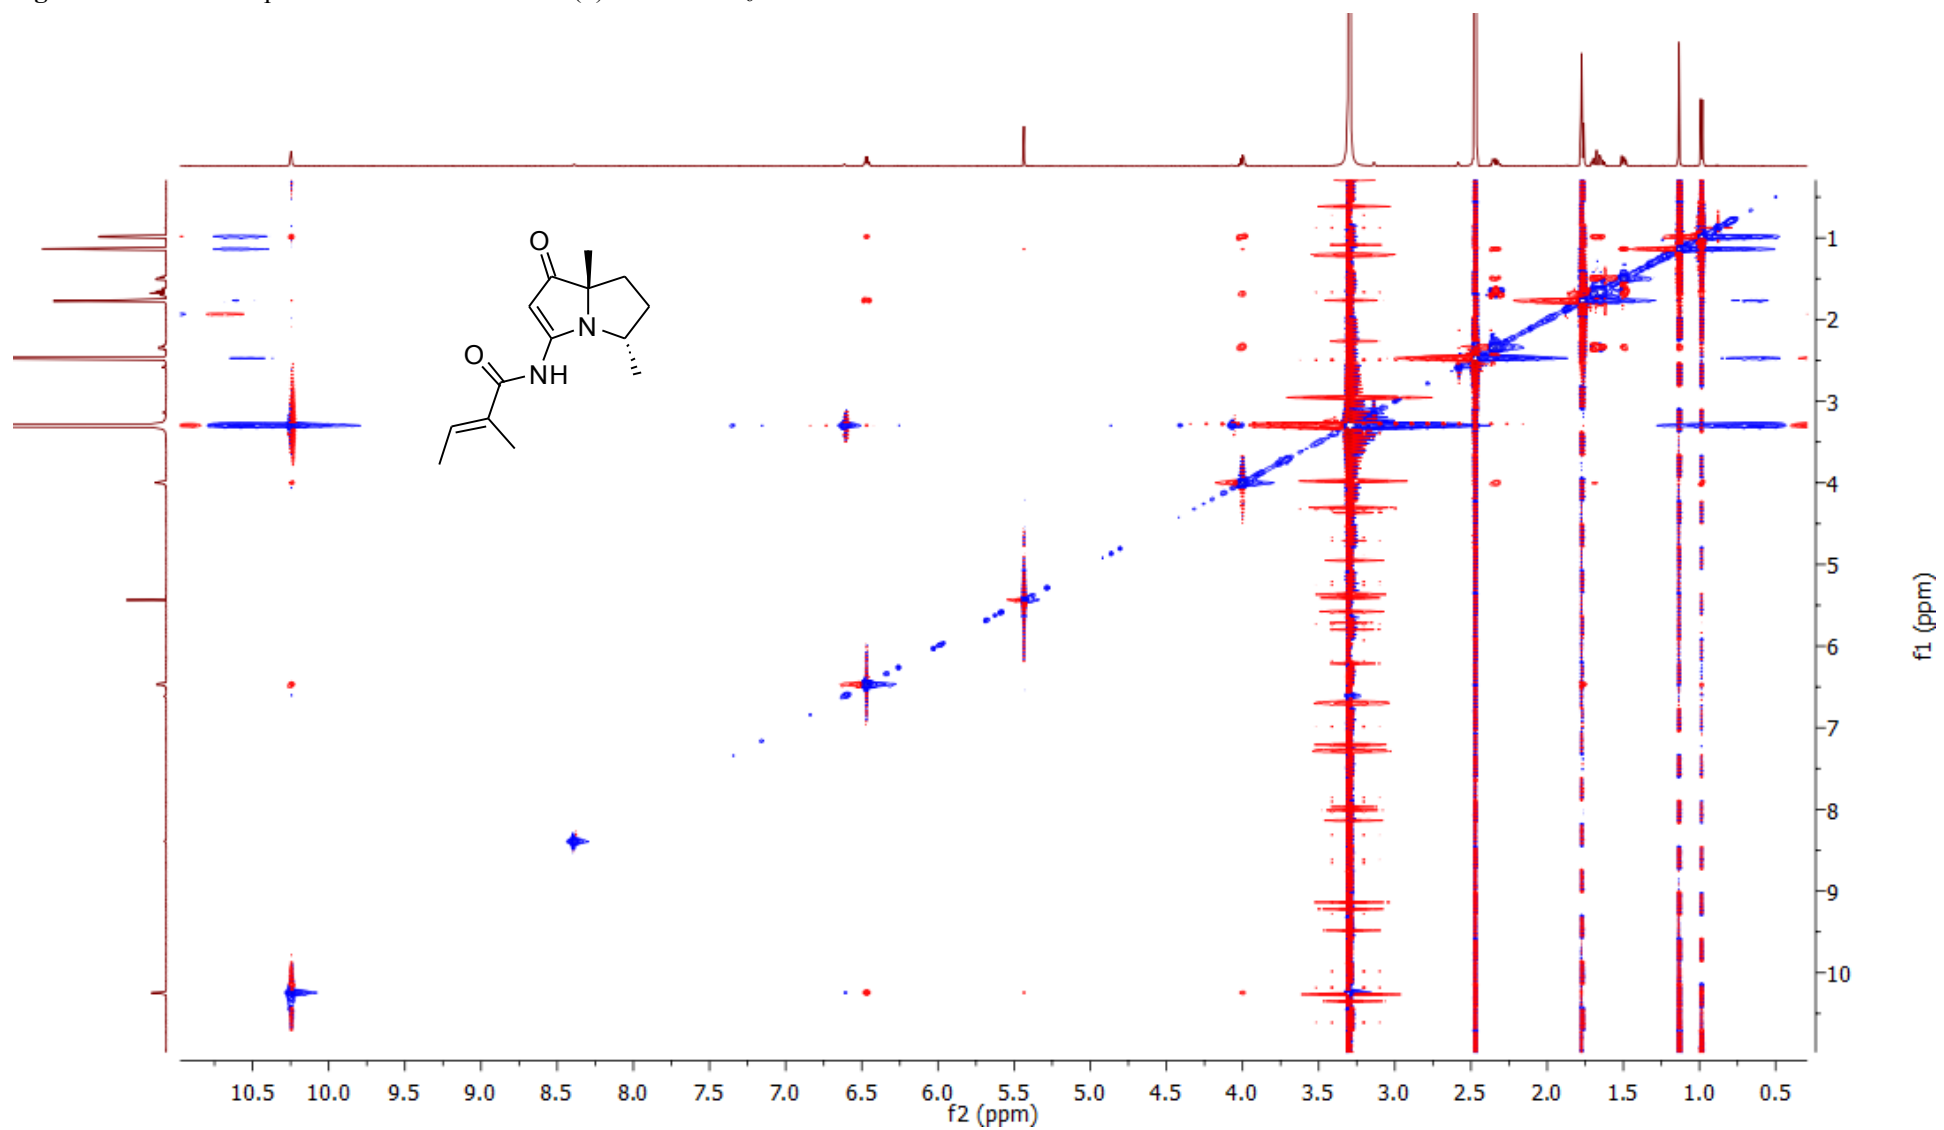

Figure S55. HRESIMS spectrum of bohemamine I (8)

Polarity/Scan Type: **Positive**

Sample Name: U6JM8180

Acq. File: 040215013.wiff

Acq. Date: Thursday, April 02, 20

Max. 3.5e5 counts.

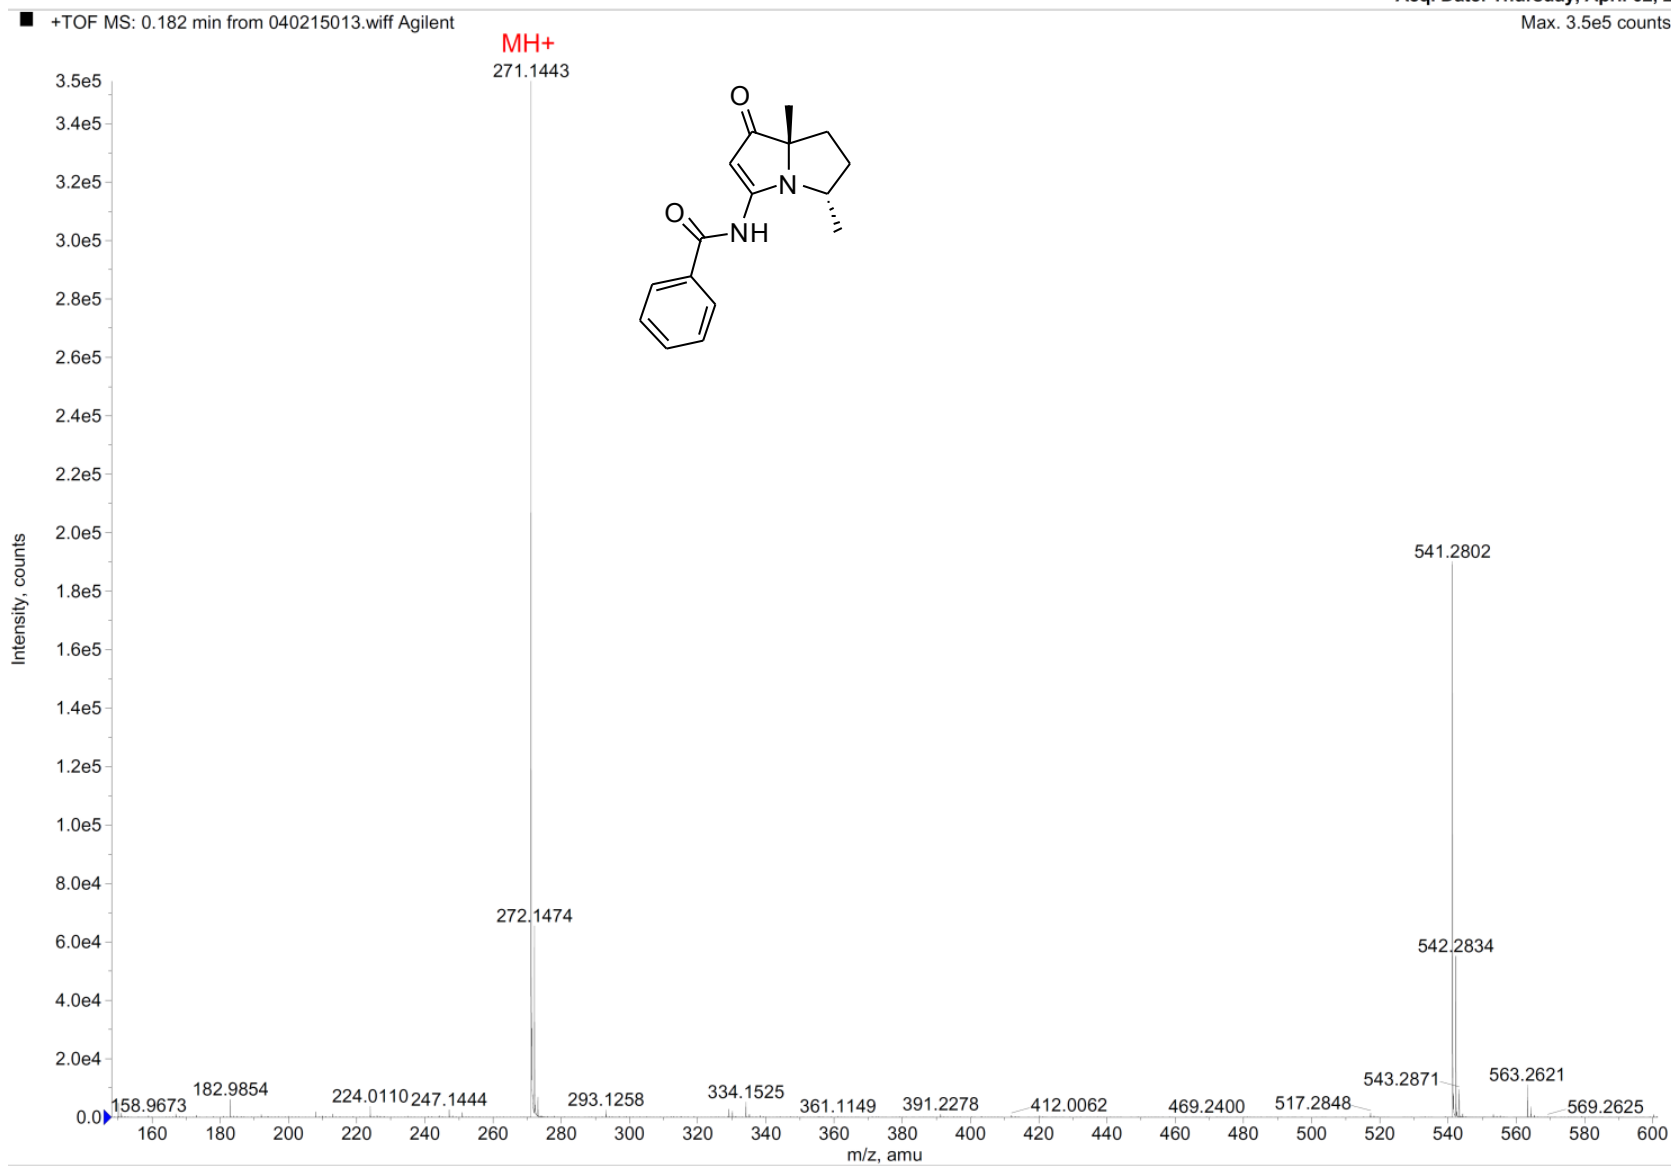

Figure S56. <sup>1</sup>H-NMR spectrum of bohemamine I (**8**) in DMSO-*d*<sub>6</sub>

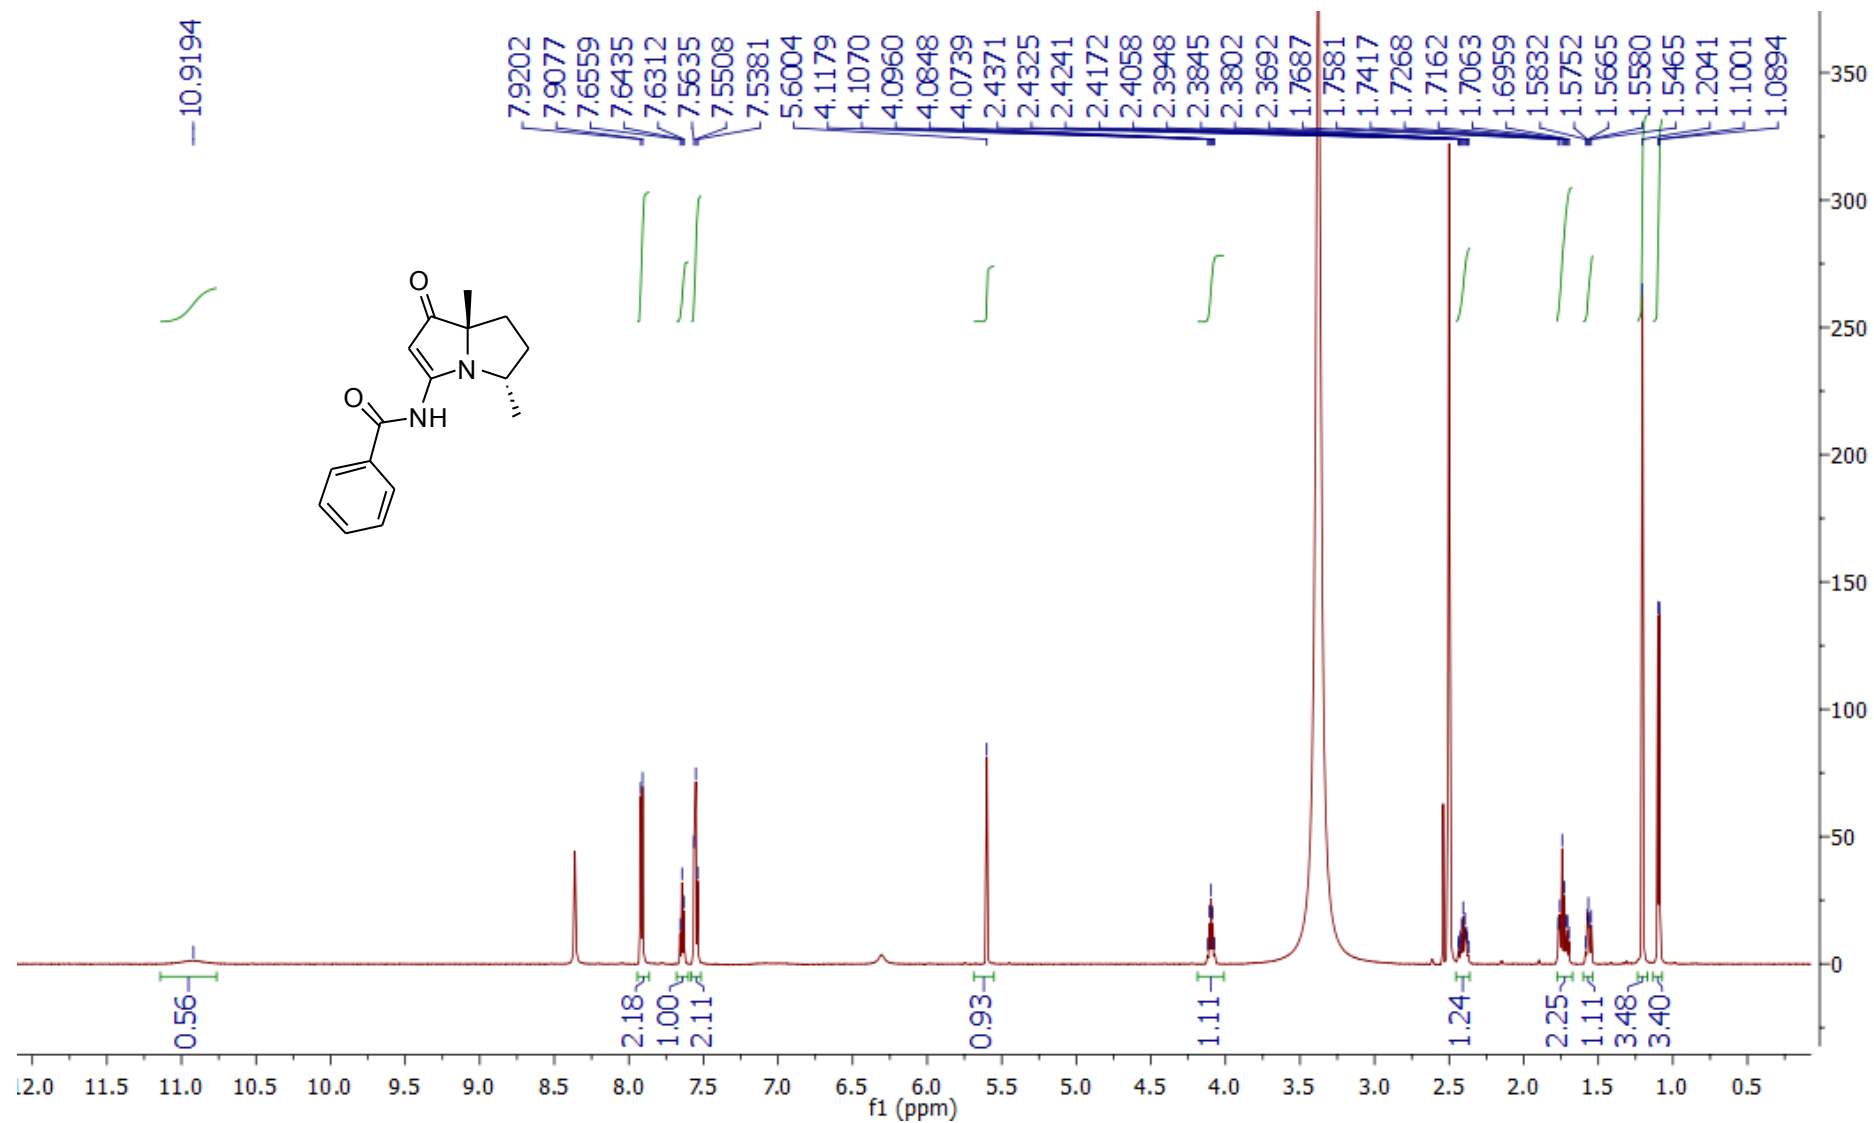

Figure S57.  $^{13}\text{C}$ -NMR spectrum of bohemamine I (**8**) in  $\text{DMSO-}d_6$

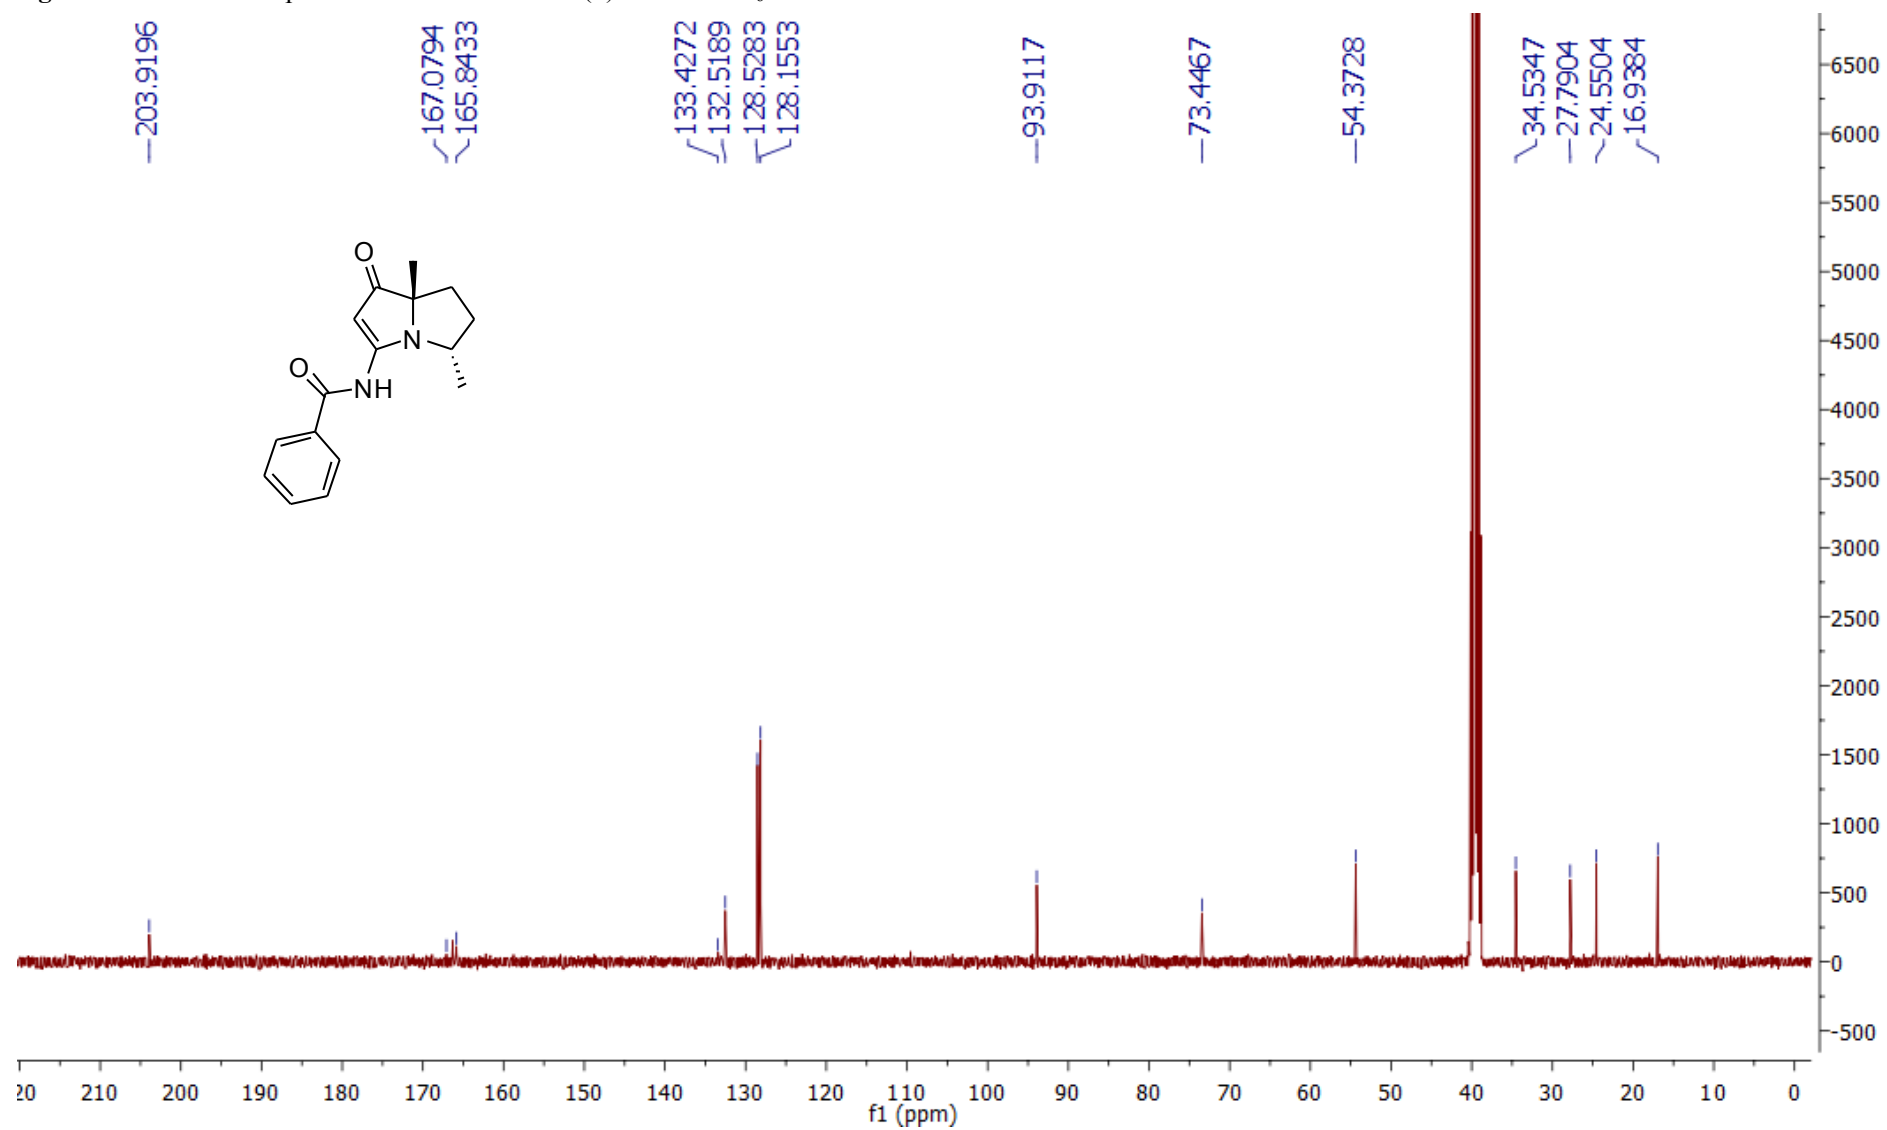

Figure S58.  $^1\text{H}$ - $^1\text{H}$  COSY spectrum of bohemamine I (**8**) in  $\text{DMSO-}d_6$

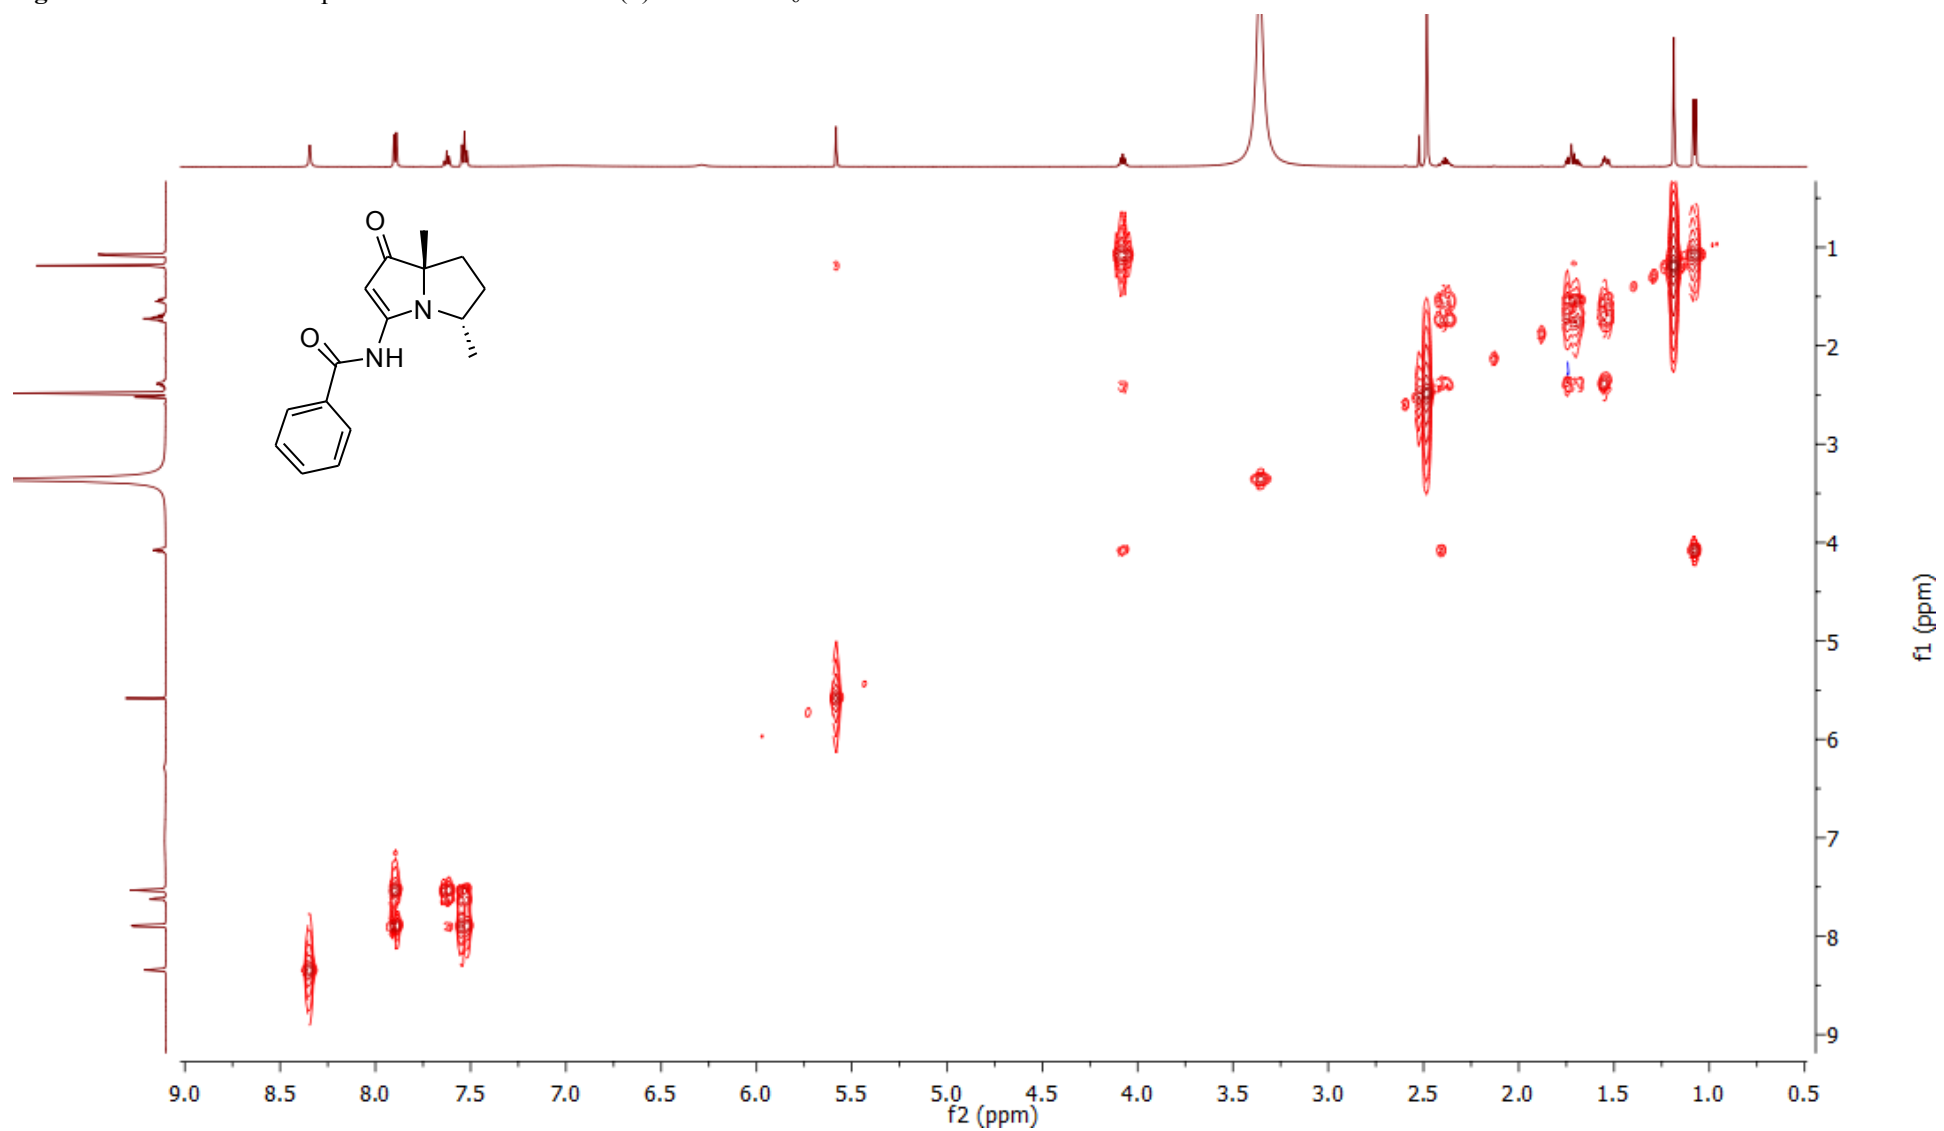

Figure S59. HSQC spectrum of bohemamine I (8) in DMSO- $d_6$

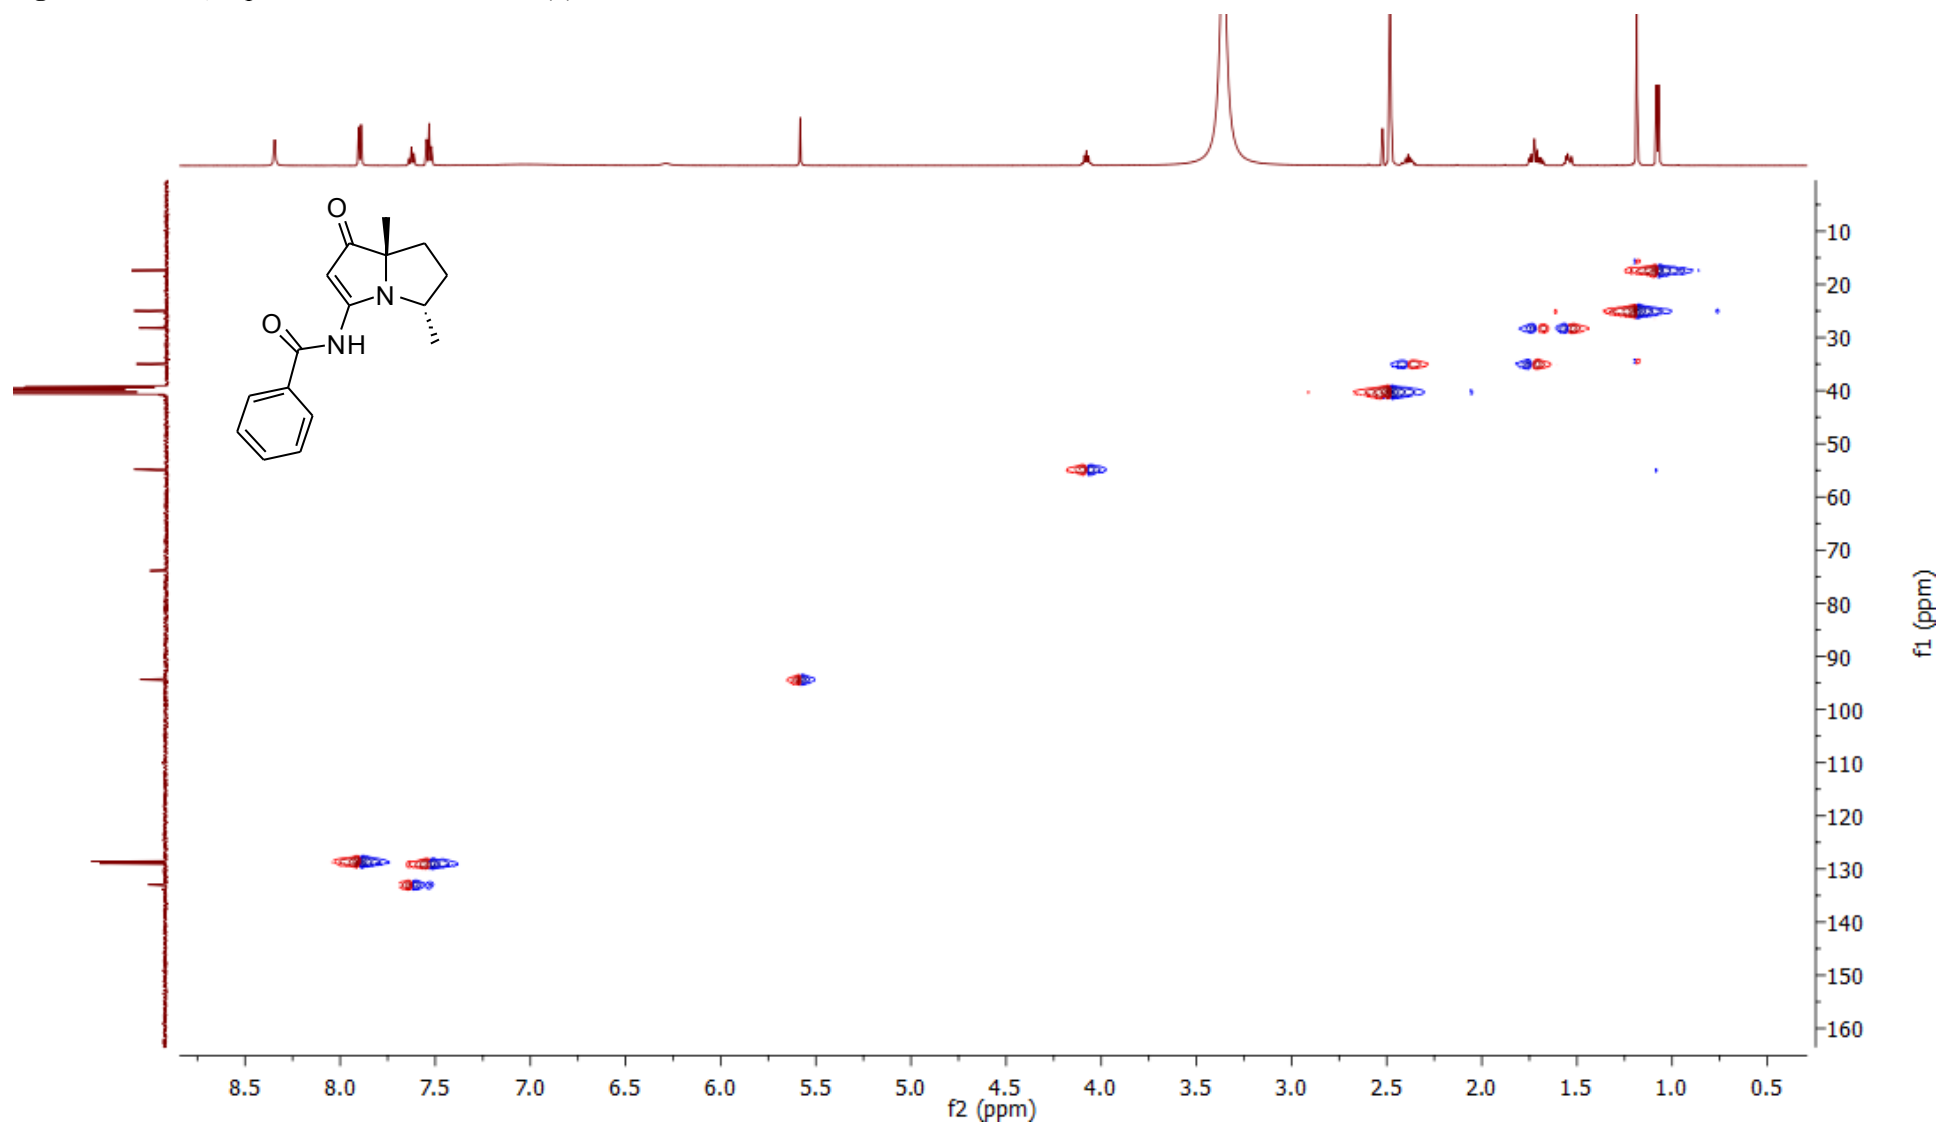

Figure S60. HMBC spectrum of bohemamine I (8) in DMSO- $d_6$

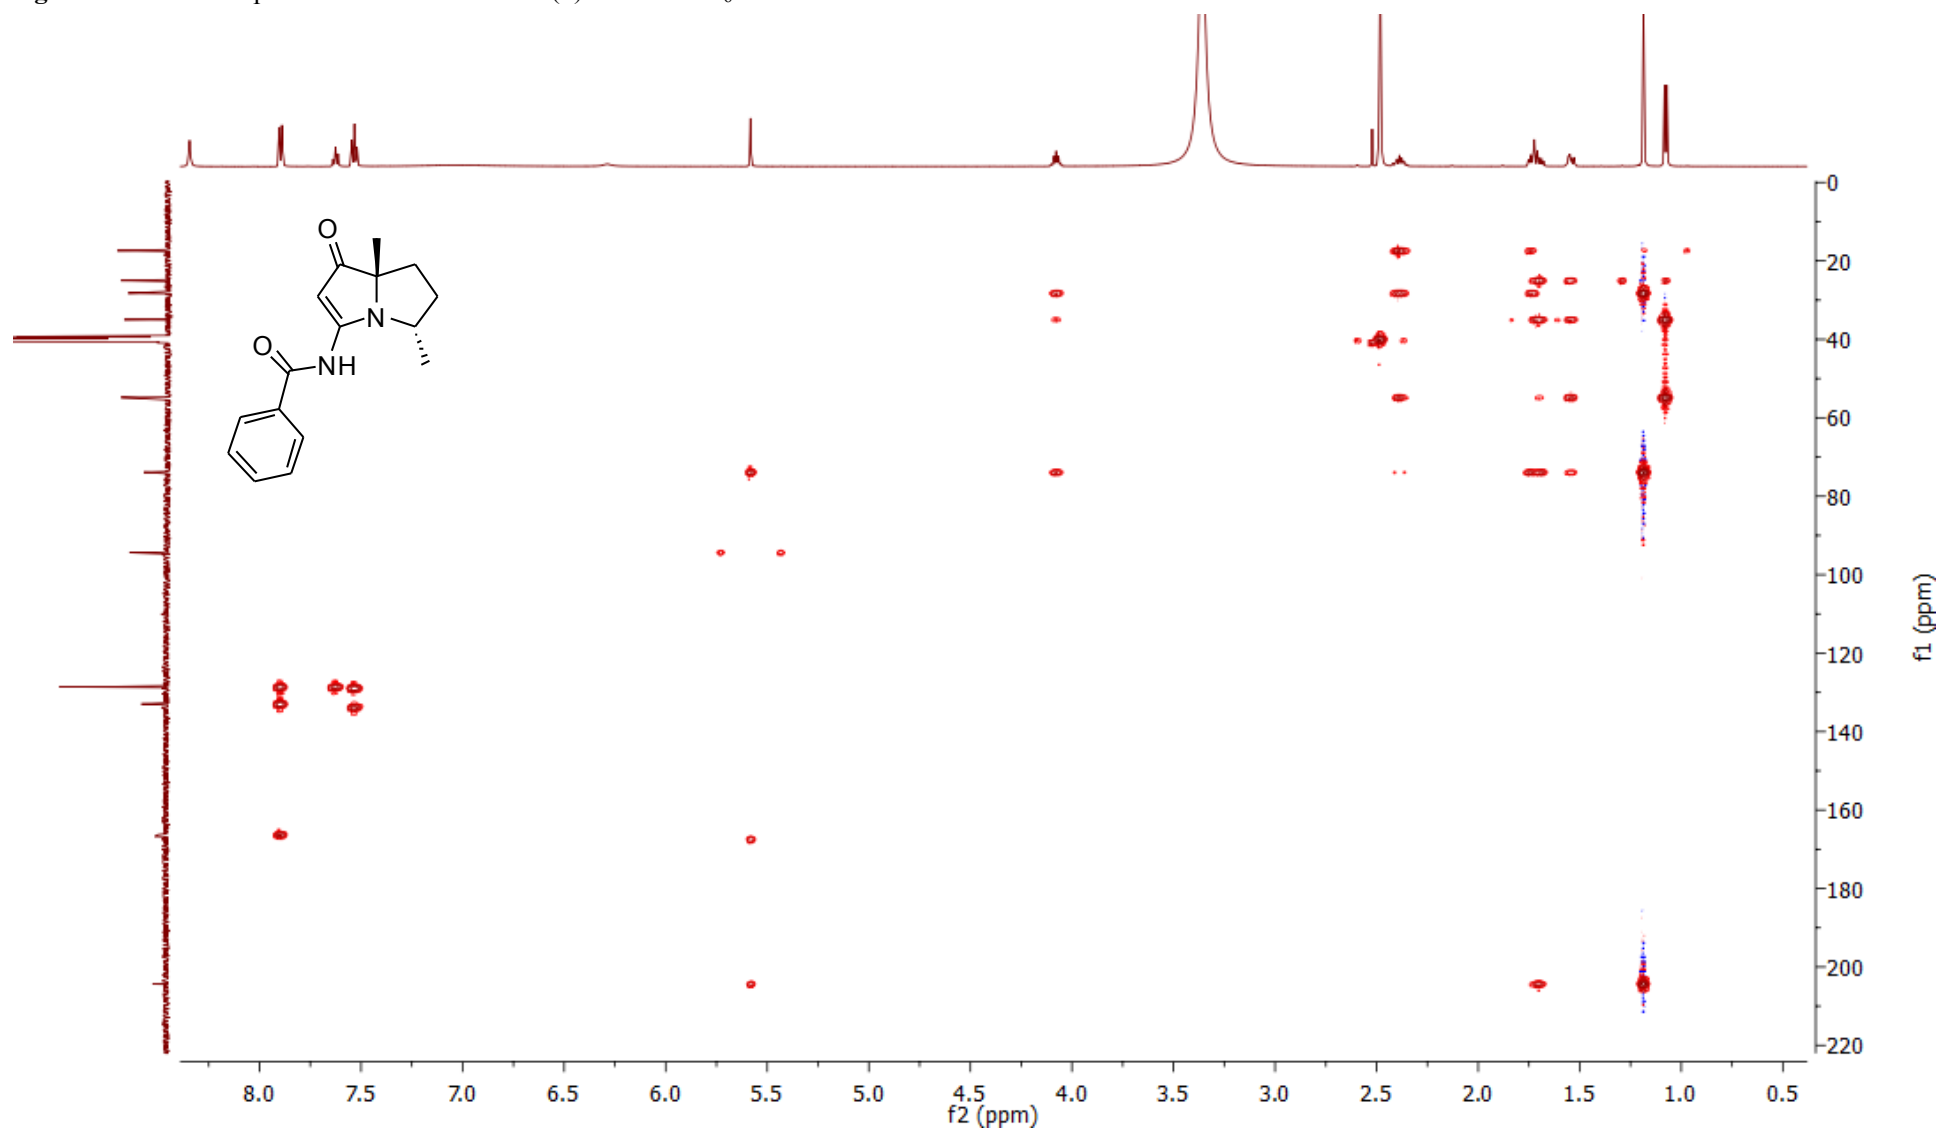

Figure S61. NOESY spectrum of bohemamine I (8) in DMSO- $d_6$

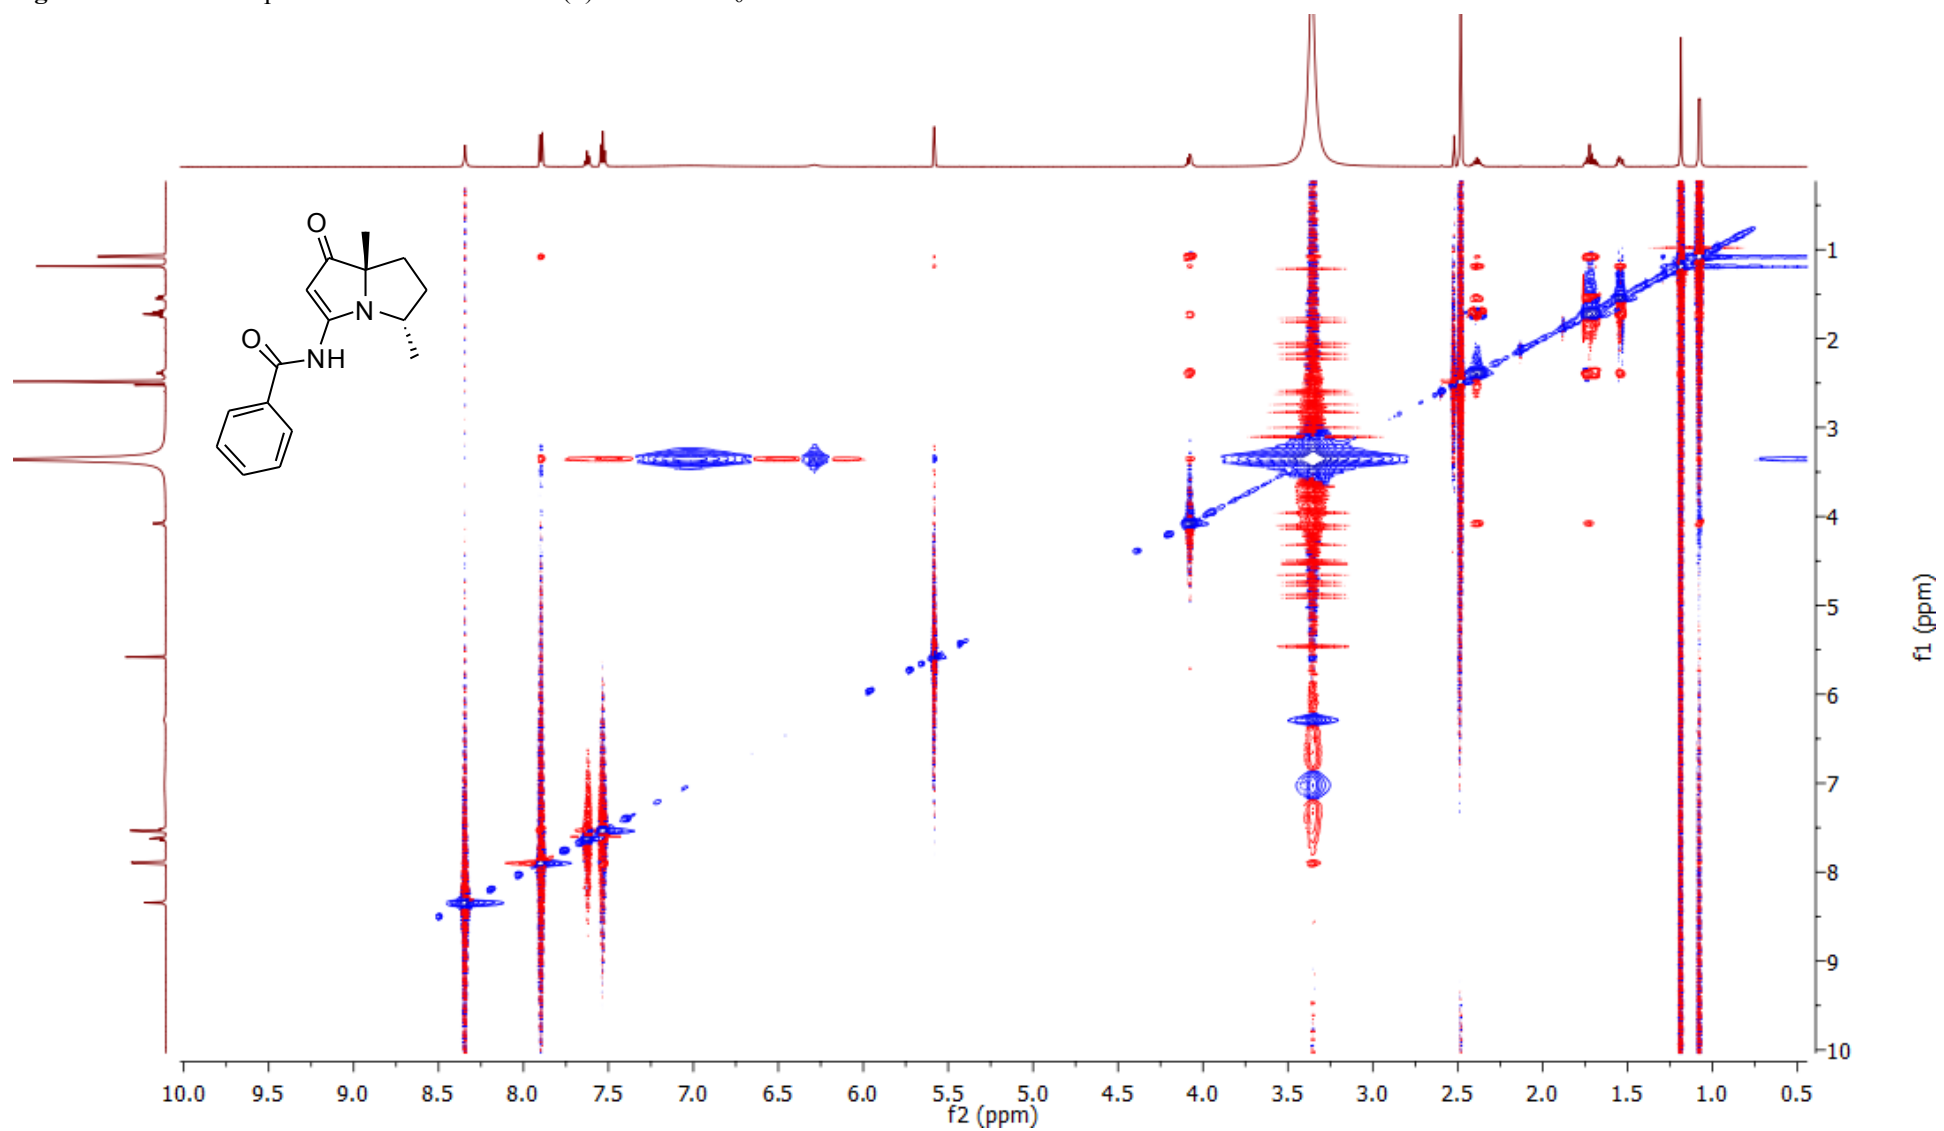

Supplement: np5b00604_si_001.pdf [file np5b00604_si_001.pdf]
